# Supplementary material for: Photoswitchable Epothilone‐Based Microtubule Stabilisers Allow GFP‐Imaging‐Compatible, Optical Control over the Microtubule Cytoskeleton
Source: PubMed Central journal article supplement — Angew Chem Int Ed Engl. 2022 Jan 20;61(10):e202114614. doi: 10.1002/anie.202114614 (PMC9305116; doi:10.1002/anie.202114614), 2022-01-20
Supplement: ANIE-61-0-s001.pdf [file ANIE-61-0-s001.pdf]

## Supporting Information

### **Photoswitchable Epothilone-Based Microtubule Stabilisers Allow GFP-Imaging-Compatible, Optical Control over the Microtubule Cytoskeleton**

*L. Gao, J. C. M. Meiring, C. Heise, A. Rai, A. Müller-Deku, A. Akhmanova, J. Thorn-Seshold, O. Thorn-Seshold\**

# Supplemental Information

## Table of Contents

|                                                                                   |    |
|-----------------------------------------------------------------------------------|----|
| Part A: Chemical Synthesis.....                                                   | 3  |
| Conventions.....                                                                  | 3  |
| Synthesis of STEpos .....                                                         | 4  |
| Synthesis of epothilone methyl ketones .....                                      | 9  |
| Synthesis of styrylthiazole phosphonates.....                                     | 11 |
| Synthesis of SBTax .....                                                          | 17 |
| Analysis of Epothilone binding for <i>E/Z</i> -STEpo2/4 activity prediction ..... | 19 |
| Part B: Photocharacterization .....                                               | 22 |
| Part C: Biological Data .....                                                     | 23 |
| Tubulin polymerisation.....                                                       | 23 |
| General cell culture.....                                                         | 24 |
| Resazurin antiproliferation assay.....                                            | 24 |
| Immunofluorescence staining .....                                                 | 25 |
| <i>In vitro</i> microtubule dynamics imaging.....                                 | 25 |
| Live cell microtubule dynamics: imaging .....                                     | 27 |
| Live cell microtubule dynamics: quantification and statistics .....               | 28 |
| Part D: NMR Spectra.....                                                          | 29 |
| Supporting Information Bibliography .....                                         | 52 |

### Author Contributions

L.G.<sup>†</sup> designed and performed the epothilone syntheses, performed photocharacterisation and cell viability assays, and coordinated data assembly. J.C.M.M.<sup>†</sup> performed live cell EB3 imaging during photoswitching and coordinated data assembly. C.H. performed cell viability assays, immunofluorescence staining, and cell cycle analysis. A.R. performed TIRF microscopy experiments. A.M.-D. synthesised the SBT-taxane. A.A. supervised TIRF microscopy and EB3 imaging. J.T.-S. performed cell cycle analysis, coordinated data assembly and supervised all other cell biology. O.T.-S. designed the concept and experiments, supervised all other experiments, coordinated data assembly and wrote the manuscript.

<sup>†</sup> These authors contributed equally.

## Part A: Chemical Synthesis

### Conventions

Abbreviations: The following abbreviations are used: Hex – distilled isohexanes, EA – ethyl acetate, DCM – dichloromethane, Et – ethyl, Ac – acetyl, Me – methyl, MeCN – acetonitrile, DMSO – dimethylsulfoxide, PBS – phosphate buffered saline, FA – Formic Acid, TFA – trifluoro acetic acid, TEA – triethyl amine, LR – Lawesson's reagent.

Safety Hazards: no unexpected or unusually high safety hazards were encountered.

Reagents and Conditions: Unless stated otherwise, (1) all reactions and characterizations were performed with unpurified, undried, non-degassed solvents and reagents, used as obtained, under closed air atmosphere without special precautions; (2) "hexane" used for chromatography was distilled from commercial crude isohexane fraction by rotary evaporation; (3) "column" and "chromatography" refer to manual flash column chromatography on Merck silica gel Si-60 (40–63  $\mu\text{m}$ ); (4) MPLC flash column chromatography refers to purification on a Biotage Isolera Spektra, using prepacked silica cartridges from Biotage; (5) procedures and yields are unoptimized; (6) yields refer to isolated chromatographically and spectroscopically pure materials, corrected for residual solvent content; (7) all eluent and solvent mixtures are given as volume ratios unless otherwise specified, thus "1:1 Hex:EA" indicates a 1:1 (v/v) mixture of hexanes and ethyl acetate; (8) chromatography eluents e.g. "0→25% EA:Hex" indicate a linear gradient of eluent composition.

Thin-layer chromatography (TLC) was run on 0.25 mm Merck silica gel plates (60, F-254), typically with Hex:EA eluents, except where indicated. UV light (254 nm) was used as a visualizing agent, with cross-checking by 365 nm UV lamp. Compounds not containing chromophores were stained with cerium ammonium molybdate instead. TLC characterizations are abbreviated as  $R_f = 0.64$  (EA:Hex = 1:1).

NMR: Standard NMR characterization was by  $^1\text{H}$ - and  $^{13}\text{C}$ -NMR spectra on a Bruker Ascend 400 (400 MHz & 100 MHz for  $^1\text{H}$  and  $^{13}\text{C}$  respectively) or a Bruker Ascend 500 (500 MHz & 125 MHz for  $^1\text{H}$  and  $^{13}\text{C}$ , respectively). Known compounds were checked against literature data and their spectral analysis is not detailed unless necessary. Chemical shifts ( $\delta$ ) are reported in ppm calibrated to residual non-perdeuterated solvent as an internal reference<sup>1</sup>. Peak descriptions singlet (s), doublet (d), triplet (t), quartet (q) and multiplet (m).

Analytical HPLC and Mass Spectra: Analytical HPLC-MS measurements were performed on an Agilent 1100 SL coupled HPLC-MS system with (a) a binary pump to deliver  $\text{H}_2\text{O}:\text{MeCN}$  eluent mixtures containing 0.1% formic acid at a 0.4 mL/min flow rate, (b) Thermo Scientific Hypersil GOLD™ C18 column (1.9  $\mu\text{m}$ ; 3 × 50 mm) maintained at 25°C, whereby the solvent front eluted at  $t_{\text{ret}} = 0.5$  min, (c) an Agilent 1100 series diode array detector used to acquire peak spectra of separated compounds/isomers in the range 200-550 nm after manually

baselining across each elution peak of interest to correct for eluent composition effects, (d) a Bruker Daltonics HCT-Ultra mass spectrometer used in ESI mode at unit mass resolution. Run conditions were a linear gradient of H<sub>2</sub>O:MeCN eluent composition from the starting ratio through to 10:90, applied during the separation phase (first 5 min), then 0:100 maintained until all peaks of interest had been observed (typically 2 min more); the column was equilibrated with the H<sub>2</sub>O:MeCN eluent mixture for 2 minutes before each run. HRMS was carried out by the Zentrale Analytik of the LMU Munich using ESI or EI ionization as specified. LRMS was carried out on an expression CMS by Advion with either APCI or ESI as ionization source.

**Preparative HPLC (prep-HPLC):** Prep-HPLC purification was carried out on a 1260 Infinity II Preparative LC System by Agilent using an Agilent reversed phase Prep-HT C18 column (21.2 x 250 mm, 10 μm) at a 20 mL/min flow rate.

## Synthesis of STEpos

### TES protected STEpo1:

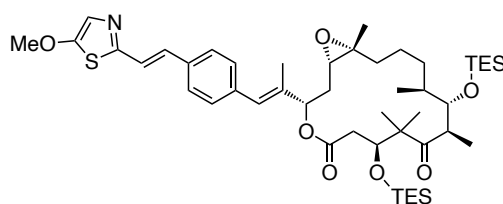

To a solution of styrylthiazole phosphonate **12a** (50 mg, 0.14 mmol, 2.5 eq) in dry THF (1.5 mL) was added sodium bis(trimethylsilyl)amide (2 M in THF, 50 μL, 0.10 mmol, 1.8 eq) and the solution was stirred at  $-78^{\circ}\text{C}$  for 30 min. A solution of methyl ketone **2** (35 mg, 55 μmol, 1 eq) in THF (1 mL) was added dropwise, and the red reaction mixture was stirred for 2 h at  $-78^{\circ}\text{C}$ . Then the reaction mixture was quenched with sat. aq. NH<sub>4</sub>Cl (2 mL), and allowed to warm to room temperature. The two phases were separated, and the aqueous layer was extracted with EA (3 × 5mL). The combined organic layers were dried over Na<sub>2</sub>SO<sub>4</sub> and concentrated under reduced pressure. The obtained residue was purified by normal phase MPLC (0→20% EA:Hex, elutes at 17% EA) to afford TES protected **STEpo1** (8.3 mg, 9.7 μmol, 18%) as a colorless oil.

**<sup>1</sup>H-NMR (500 MHz, CDCl<sub>3</sub>):** δ = 7.45 (d, *J* = 8.2 Hz, 2H), 7.29 (d, *J* = 8.0 Hz, 2H), 7.15 – 7.05 (m, 3H), 6.55 (s, 1H), 5.29 (dd, *J* = 8.9, 2.8 Hz, 1H), 4.14 (dd, *J* = 7.2, 4.8 Hz, 1H), 3.95 (s, 3H), 3.91 (d, *J* = 9.1 Hz, 1H), 3.09 – 3.00 (m, 1H), 2.84 (dd, *J* = 9.9, 3.6 Hz, 1H), 2.73 – 2.60 (m, 2H), 2.22 (dt, *J* = 14.9, 3.2 Hz, 1H), 1.93 (d, *J* = 1.4 Hz, 3H), 1.92 – 1.84 (m, 1H), 1.74 (dt, *J* = 12.5, 6.0 Hz, 1H), 1.44 – 1.31 (m, 4H), 1.28 (s, 3H), 1.25 (s, 1H), 1.21 (s, 1H), 1.18 (s, 3H), 1.14 (s, 3H), 1.10 (d, *J* = 6.8 Hz, 3H), 1.00 – 0.97 (m, 12H), 0.93 (t, *J* = 8.0 Hz, 9H), 0.64 (dd, *J* = 16.5, 8.1 Hz, 12H) ppm. **<sup>13</sup>C-NMR (125 MHz, CDCl<sub>3</sub>):** δ = 215.4, 170.8, 162.3, 155.1, 137.1,

136.8, 134.5, 131.7, 129.6, 127.0, 126.6, 122.6, 121.7, 79.8, 77.1, 75.7, 62.5, 62.1, 61.4, 53.5, 48.1, 39.9, 36.7, 33.9, 32.2, 31.3, 29.7, 24.9, 23.8, 22.4, 19.6, 17.5, 14.1, 7.2, 7.0, 5.5, 5.3 ppm.  $R_f = 0.48$  (EA:Hex = 2:8). **HRMS (ESI, positive)**: calc. for  $C_{47}H_{76}NO_7SSi_2^+$   $[M+H]^+$  854.4876, found 854.4864.

### STEpo1:

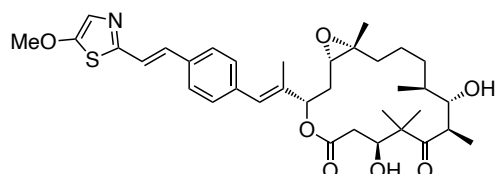

TES protected **STEpo1** (8.3 mg, 9.7  $\mu$ mol, 1 eq) was dissolved in dry THF (1 mL) and cooled to 0°C. HF•pyr (70%, 40  $\mu$ L, excess) was added and the reaction mixture was allowed to warm to room temperature. After 5 h, the reaction mixture was carefully quenched with sat. aq.  $NaHCO_3$  (10 mL). The two layers were separated, and the aqueous layer was extracted with EA (3  $\times$  10 mL). The combined organic layers were dried over  $Na_2SO_4$  and concentrated under reduced pressure. Purification by prep-HPLC (40 $\rightarrow$ 100% MeCN:H<sub>2</sub>O) afforded **STEpo1** (1 mg, 1.6  $\mu$ mol, 16%) as colorless solid.

**<sup>1</sup>H-NMR (500 MHz, CDCl<sub>3</sub>)**:  $\delta = 7.46$  (d,  $J = 8.3$  Hz, 2H), 7.28 (d,  $J = 8.4$  Hz, 2H), 7.13 – 7.05 (m, 3H), 6.58 (s, 1H), 5.48 (dd,  $J = 7.0, 4.0$  Hz, 1H), 4.08 (dd,  $J = 9.3, 3.1$  Hz, 1H), 3.95 (s, 3H), 3.81 (t,  $J = 4.4$  Hz, 1H), 3.35 – 3.26 (m, 1H), 2.83 (dd,  $J = 7.2, 5.5$  Hz, 1H), 2.57 (dd,  $J = 14.7, 9.6$  Hz, 1H), 2.48 (d,  $J = 3.5$  Hz, 1H), 2.35 (s, 1H), 2.13 – 2.03 (m, 2H), 2.02 – 1.92 (m, 5H), 1.70 (dd,  $J = 15.1, 7.9$  Hz, 3H), 1.57 – 1.43 (m, 3H), 1.35 (s, 3H), 1.30 (s, 3H), 1.18 (d,  $J = 7.0$  Hz, 3H), 1.11 (s, 3H), 1.01 (d,  $J = 7.0$  Hz, 3H) ppm.  $R_f = 0.24$  (EA:Hex = 6:4). **HRMS (ESI, positive)**: calc. for  $C_{35}H_{48}NO_7S^+$   $[M+H]^+$  626.3146, found 626.3144.

### TES protected STEpo2:

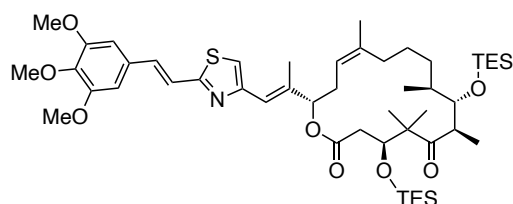

To a solution of styrylthiazole phosphonate **8** (45 mg, 0.11 mmol, 3.5 eq) in dry THF (1.5 mL) was added *n*-BuLi (2.5 M in hexane, 30  $\mu$ L, 76  $\mu$ mol, 2.5 eq) and the purple solution was stirred at –78°C for 45 min. A solution of methyl ketone **3** (19 mg, 30  $\mu$ mol, 1 eq) in THF (1 mL) was added dropwise, and the reaction mixture was allowed to slowly warm to 0°C. After 2 h the orange reaction mixture was quenched with sat. aq.  $NH_4Cl$  (2 mL), and transferred to a separation funnel. The two layers were separated, and the aqueous layer was extracted with

EA (3 × 5 mL). The combined organic layers were dried over Na<sub>2</sub>SO<sub>4</sub> and concentrated under reduced pressure. The obtained residue was purified by normal phase MPLC (0→20% EA:Hex, elutes at 10% EA) to afford TES protected **STEpo2** (12 mg, 13 μmol, 44%) as colorless oil.

**<sup>1</sup>H-NMR (500 MHz, C<sub>6</sub>D<sub>6</sub>):** δ = 7.52 (d, *J* = 16.1 Hz, 1H), 7.35 (d, *J* = 16.1 Hz, 1H), 6.78 (s, 1H), 6.62 (s, 1H), 6.53 (s, 2H), 5.33 (d, *J* = 9.8 Hz, 1H), 5.27 – 5.21 (m, 1H), 4.23 (d, *J* = 8.9 Hz, 1H), 4.15 (d, *J* = 9.4 Hz, 1H), 3.82 (s, 3H), 3.32 (s, 6H), 3.06 – 2.96 (m, 1H), 2.87 – 2.75 (m, 2H), 2.64 (ddd, *J* = 20.2, 11.8, 4.9 Hz, 2H), 2.38 (s, 3H), 2.03 (dd, *J* = 14.3, 6.3 Hz, 1H), 1.93 – 1.78 (m, 4H), 1.75 (s, 3H), 1.39 – 1.34 (m, 2H), 1.21 (d, *J* = 6.9 Hz, 3H), 1.19 (s, 3H), 1.12 – 1.07 (m, 21H), 0.86 – 0.80 (m, 6H), 0.77 (t, *J* = 7.9 Hz, 6H), 0.73 (s, 3H) ppm. **<sup>13</sup>C-NMR (125 MHz, C<sub>6</sub>D<sub>6</sub>):** δ = 214.0, 170.9, 166.0, 154.9, 154.4, 140.6, 140.4, 139.4, 135.1, 131.4, 121.2, 120.3, 120.1, 116.7, 105.1, 80.6, 76.7, 60.6, 55.8, 53.4, 48.0, 39.4, 38.1, 32.7, 32.5, 32.0, 30.2, 28.1, 25.2, 23.4, 23.3, 19.5, 17.7, 15.3, 7.5, 7.4, 6.1, 5.9 ppm. **R<sub>f</sub>** = 0.56 (EA:Hex = 2:8). **LRMS (APCI, positive):** calc. for C<sub>49</sub>H<sub>80</sub>NO<sub>8</sub>SSi<sub>2</sub> [M+H]<sup>+</sup> 898.5138, found 899.5.

#### **STEpo2:**

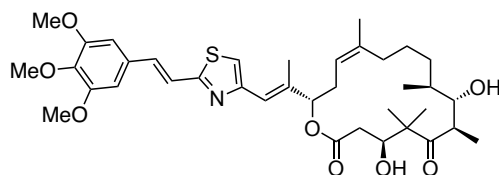

TES protected **STEpo2** (12 mg, 13 μmol, 1 eq) was dissolved in dry THF (1 mL) and cooled to 0°C. HF·pyr (70%, 75 μL, excess) was added and reaction mixture was allowed to warm to room temperature. After 1.5 h, only mono-deprotected TES **STEpo2** was observed. Another 50 μL HF·pyr was added at 0°C and stirring was continued another 2 h at room temperature. The reaction mixture was carefully quenched with sat. aq. NaHCO<sub>3</sub> (10 mL). The two layers were separated, and the aqueous layer was extracted with EA (3 × 10 mL). The combined organic layers were dried over Na<sub>2</sub>SO<sub>4</sub> and concentrated under reduced pressure. Purification by prep-HPLC (40→100% MeCN:H<sub>2</sub>O + 0.1% FA) afforded **STEpo2** (6.5 mg, 9.7 μmol, 73%) as slightly yellowish solid.

**<sup>1</sup>H-NMR (500 MHz, C<sub>6</sub>D<sub>6</sub>):** δ = 7.53 (d, *J* = 16.1 Hz, 1H), 7.30 (d, *J* = 16.1 Hz, 1H), 6.85 (t, *J* = 1.4 Hz, 1H), 6.63 (s, 1H), 6.56 (s, 2H), 5.48 – 5.43 (m, 1H), 5.20 (dd, *J* = 10.2, 5.2 Hz, 1H), 4.22 (dd, *J* = 11.0, 2.8 Hz, 1H), 3.83 (s, 3H), 3.74 (dd, *J* = 4.1, 2.8 Hz, 1H), 3.34 (s, 6H), 2.97 (qd, *J* = 6.8, 2.8 Hz, 1H), 2.69 (dt, *J* = 15.0, 9.8 Hz, 1H), 2.39 (dd, *J* = 14.9, 11.0 Hz, 1H), 2.26 (d, *J* = 1.3 Hz, 4H), 2.18 – 2.10 (m, 2H), 1.81 (dt, *J* = 19.0, 5.7 Hz, 2H), 1.64 (t, *J* = 1.5 Hz, 4H), 1.28 – 1.20 (m, 3H), 1.10 (d, *J* = 6.8 Hz, 3H), 1.03 (d, *J* = 7.0 Hz, 3H), 1.01 (s, 3H), 0.97 (s, 3H) ppm. **<sup>13</sup>C-NMR (125 MHz, C<sub>6</sub>D<sub>6</sub>):** δ = 219.6, 170.1, 166.1, 154.6, 154.4, 140.7, 139.6, 138.6, 135.2, 131.4, 121.4, 120.8, 119.7, 116.3, 105.2, 79.4, 74.5, 72.8, 60.6, 55.8, 53.6, 42.1,

40.1, 38.7, 32.8, 32.0, 31.7, 25.9, 23.2, 22.8, 18.4, 16.1, 15.9, 13.9 ppm.  $R_f = 0.31$  (EA:Hex = 4:6). **HRMS (ESI, positive)**: calc. for  $C_{37}H_{52}NO_8S^+$   $[M+H]^+$  670.3408, found 670.3410.

### TES protected STEpo3:

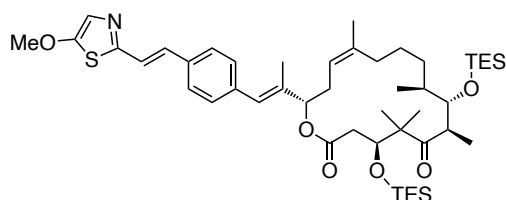

To a solution of styrylthiazole phosphonate **12a** (39 mg, 0.11 mmol, 3 eq) in dry THF (1.5 mL) was added sodium bis(trimethylsilyl)amide (2 M in THF, 44  $\mu$ L, 88  $\mu$ mol, 2.5 eq) and the red solution was stirred at  $-78^\circ\text{C}$  for 50 min. A solution of methyl ketone **3** (22 mg, 35  $\mu$ mol, 1 eq) in THF (1 mL) was added dropwise, and the reaction mixture was allowed to slowly warm to  $0^\circ\text{C}$ . After 2.5 h the reaction mixture was quenched with sat. aq.  $\text{NH}_4\text{Cl}$  (5 mL), and the reaction mixture was allowed to warm to room temperature. The two layers were separated, and the aqueous layer was extracted with EA ( $3 \times 5\text{ mL}$ ). The combined organic layers were dried over  $\text{Na}_2\text{SO}_4$  and concentrated under reduced pressure. The obtained residue was purified by normal phase MPLC (5 $\rightarrow$ 25% EA:Hex, elutes at 11%) to afford TES protected **STEpo3** (12 mg, 14  $\mu$ mol, 41%) as colorless oil.

**$^1\text{H-NMR}$  (400 MHz,  $\text{CDCl}_3$ )**:  $\delta = 7.47$  (d,  $J = 8.2$  Hz, 2H), 7.29 (d,  $J = 8.1$  Hz, 2H), 7.17 (d,  $J = 6.7$  Hz, 2H), 7.08 (s, 1H), 6.51 (s, 1H), 5.19 (t,  $J = 8.2$  Hz, 1H), 5.12 (d,  $J = 9.9$  Hz, 1H), 4.12 (dd,  $J = 8.0, 3.9$  Hz, 1H), 3.97 (s, 3H), 3.94 (d,  $J = 9.0$  Hz, 1H), 3.11 – 2.98 (m, 1H), 2.73 – 2.68 (m, 2H), 2.44 (d,  $J = 8.5$  Hz, 1H), 2.08 (dd,  $J = 14.9, 5.7$  Hz, 1H), 1.94 (s, 3H), 1.77 – 1.63 (m, 5H), 1.60 – 1.49 (m, 2H), 1.25 (s, 3H), 1.18 (s, 3H), 1.11 (d,  $J = 7.3$  Hz, 6H), 0.99 (t,  $J = 7.8$  Hz, 12H), 0.90 (t,  $J = 7.9$  Hz, 9H), 0.67 (q,  $J = 8.0$  Hz, 6H), 0.59 (q,  $J = 7.5$  Hz, 6H) ppm.

**$^{13}\text{C-NMR}$  (125 MHz,  $\text{CDCl}_3$ )**:  $\delta = 215.6, 171.1, 162.2, 155.8, 140.6, 138.1, 134.0, 129.7, 127.0, 126.1, 119.4, 80.1, 80.0, 76.1, 61.7, 53.7, 48.0, 39.7, 37.5, 32.6, 32.1, 32.1, 31.3, 29.9, 27.5, 24.4, 24.0, 23.2, 22.8, 19.3, 17.7, 14.6, 14.3, 7.3, 7.1, 5.7, 5.4$  ppm.  $R_f = 0.28$  (EA:Hex = 15:85).

**HRMS (ESI, positive)**: calc. for  $C_{47}H_{76}NO_6\text{SSi}_2$   $[M+H]^+$  838.4926, 838.4926 found.

### STEpo3:

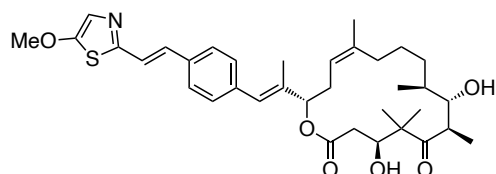

TES protected **STEpo3** (12 mg, 14  $\mu$ mol, 1 eq) was dissolved in dry THF (2 mL) and cooled to  $0^\circ\text{C}$ . HF $\cdot$ pyr (70%, 100  $\mu$ L, excess) was added and reaction mixture was allowed to warm to room temperature. After 5 h the reaction mixture was carefully quenched with sat. aq.



NaHCO<sub>3</sub> (10 mL). The two layers were separated, and the aqueous layer was extracted with EA (3 × 10 mL). The combined organic layers were dried over Na<sub>2</sub>SO<sub>4</sub> and concentrated under reduced pressure. Purification by prep-HPLC (40→100% MeCN:H<sub>2</sub>O + 0.1% FA) afforded desired product *E*-**STEpo3** (1.7 mg, 28 μmol, 20%) as colorless solid and *Z*-**STEpo3** (1.3 mg, 21 μmol, 25%) as colorless solid.

**<sup>1</sup>H-NMR (500 MHz, C<sub>6</sub>D<sub>6</sub>):** δ = 7.27 (d, *J* = 16.1 Hz, 1H), 7.21 – 7.18 (m, 4H), 7.13 (d, *J* = 12.3 Hz, 1H), 7.03 (s, 1H), 6.72 (s, 1H), 5.45 (dd, *J* = 9.9, 2.2 Hz, 1H), 5.20 (dd, *J* = 10.1, 5.2 Hz, 1H), 4.07 (ddd, *J* = 10.4, 6.7, 2.9 Hz, 1H), 3.73 (s, 1H), 3.17 (s, 3H), 2.93 (qd, *J* = 6.8, 3.0 Hz, 1H), 2.80 (s, 1H), 2.68 (dt, *J* = 15.0, 9.9 Hz, 1H), 2.34 – 2.27 (m, 2H), 2.14 (dd, *J* = 15.3, 2.9 Hz, 1H), 2.11 – 2.07 (m, 1H), 2.00 (d, *J* = 7.0 Hz, 1H), 1.86 (s, 3H), 1.84 – 1.78 (m, 2H), 1.64 (s, 3H), 1.62 – 1.56 (m, 1H), 1.23 – 1.18 (m, 3H), 1.08 (d, *J* = 6.8 Hz, 3H), 1.02 (d, *J* = 7.1 Hz, 3H), 0.92 (s, 3H), 0.89 (s, 3H) ppm. **<sup>13</sup>C-NMR (125 MHz, C<sub>6</sub>D<sub>6</sub>):** δ = 219.3, 170.0, 162.7, 154.8, 138.6, 137.7, 137.5, 135.0, 131.7, 129.9, 127.1, 126.8, 123.4, 122.3, 121.4, 79.7, 74.5, 73.1, 60.5, 53.2, 42.3, 40.0, 38.7, 32.7, 31.9, 30.2, 26.1, 23.2, 22.5, 18.8, 16.2, 14.9, 14.0 ppm. **R<sub>f</sub>** = 0.43 (EA:Hex = 6:4). **HRMS (ESI, positive):** calc. for C<sub>35</sub>H<sub>48</sub>NO<sub>6</sub>S<sup>+</sup> [M+H]<sup>+</sup> 610.3197, found 610.3201.

#### STEpo4:

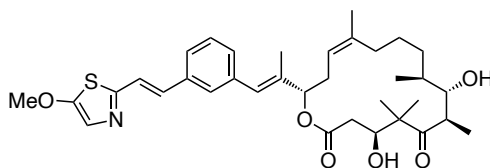

To a solution of styrylthiazole phosphonate **12b** (30 mg, 82 μmol, 4.6 eq) in dry THF (1 mL) was added *n*-BuLi (2 M in THF, 25 μL, 63 μmol, 3.5 eq) and the solution was stirred at –78°C for 1 h. A solution of methyl ketone **3** (11 mg, 18 μmol, 1 eq) in THF (1 mL) was added dropwise, and the reaction mixture was allowed to slowly warm to 0°C. Reaction progress was checked by TLC after 2.5 h, showing a weak fluorescent spot **R<sub>f</sub>** = 0.32 (EA:Hex = 1:9). The reaction mixture was quenched with sat. aq. NH<sub>4</sub>Cl (4 mL), and the reaction mixture was allowed to warm to room temperature. The two layers were separated, and the aqueous layer was extracted with EA (3 × 5 mL). The combined organic layers were dried over Na<sub>2</sub>SO<sub>4</sub> and concentrated under reduced pressure. The crude product was filtered over a short silica plug (EA:Hex = 3:7) to remove phosphonate **12b** and the filtrate was concentrated. The crude was redissolved in dry THF (1 mL) and cooled to 0°C. HF•pyr (70%, 100 μL, excess) was added and reaction mixture was allowed to warm to room temperature. After 3 h the reaction mixture was carefully quenched with sat. aq. NaHCO<sub>3</sub> (10 mL). The two layers were separated, and the aqueous layer was extracted with EA (3 × 10 mL). The combined organic layers were dried over Na<sub>2</sub>SO<sub>4</sub> and concentrated under reduced pressure. Purification over prep-HPLC

(40→100% MeCN:H<sub>2</sub>O + 0.1% FA) afforded **STepo4** (0.8 mg, 1.3 μmol, 7%) as colorless solid.

**<sup>1</sup>H-NMR (400 MHz, C<sub>6</sub>D<sub>6</sub>):** δ = 7.37 (s, 1H), 7.27 (s, 1H), 7.23 (s, 1H), 7.21 (s, 1H), 7.08 – 7.04 (m, 2H), 7.01 (s, 1H), 6.73 (s, 1H), 5.46 (dd, *J* = 9.7, 2.1 Hz, 1H), 5.21 (dd, *J* = 9.8, 4.8 Hz, 1H), 4.09 (dd, *J* = 10.8, 2.4 Hz, 1H), 3.73 (t, *J* = 3.3 Hz, 1H), 3.46 (br, 1H), 3.16 (s, 3H), 2.93 (dd, *J* = 6.8, 3.0 Hz, 1H), 2.81 (br, 1H), 2.69 (dt, *J* = 14.8, 9.8 Hz, 1H), 2.32 (dd, *J* = 15.1, 10.9 Hz, 2H), 2.18 – 2.09 (m, 2H), 1.87 – 1.77 (m, 5H), 1.65 (d, *J* = 1.5 Hz, 3H), 1.60 (d, *J* = 4.0 Hz, 1H), 1.23 (s, 3H), 1.07 (d, *J* = 6.8 Hz, 3H), 1.02 (d, *J* = 7.0 Hz, 3H), 0.92 (s, 3H), 0.89 (s, 3H) ppm. **R<sub>f</sub>** = 0.51 (EA:Hex = 6:4). **HRMS (ESI, positive):** calc. for C<sub>35</sub>H<sub>48</sub>NO<sub>6</sub>S<sup>+</sup> [M+H]<sup>+</sup> 610.3197, found 610.3203.

## Synthesis of epothilone methyl ketones

Synthesis of the Epothilone B/ Epothilone D methyl ketones was performed closely following previously reported protocols by Nicolaou et al<sup>2,3</sup> and characterization matched the literature.

### Synthesis of methyl ketone 1

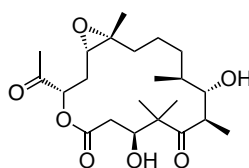

Freshly generated ozone was bubbled through a stirred solution of Epothilone B (117 mg, 230 μmol, 1.0 eq) in dichloromethane (5 mL) at –78°C. The reaction mixture was immediately quenched with dimethyl sulfide (170 μL, 2.31 mmol, 10 eq) when the color turned blue. The reaction mixture was warmed to room temperature and stirred for 1 h before the solvent was removed under reduced pressure and purified by MPLC (20→60% EA:Hex) to give methyl ketone 1 (76 mg, 184 μmol, 80%) as colorless solid and recovered starting material Epothilone B (11 mg, 22 μmol, 9%).

**<sup>1</sup>H-NMR (500 MHz, CDCl<sub>3</sub>):** δ = 5.30 (dd, *J* = 10.5, 1.9 Hz, 1H), 4.30 (dd, *J* = 10.6, 3.2 Hz, 1H), 3.69 (t, *J* = 4.3 Hz, 1H), 3.24 (qd, *J* = 6.8, 4.7 Hz, 1H), 2.82 (dd, *J* = 9.4, 3.1 Hz, 1H), 2.55 (d, *J* = 10.6 Hz, 1H), 2.52 (d, *J* = 10.6 Hz, 1H), 2.34 (dt, *J* = 15.3, 2.6 Hz, 1H), 2.28 (s, 3H), 2.25 (d, *J* = 3.0 Hz, 1H), 1.79 – 1.70 (m, 2H), 1.68 – 1.61 (m, 1H), 1.51 – 1.43 (m, 1H), 1.41 (s, 3H), 1.37 – 1.29 (m, 2H), 1.28 (s, 3H), 1.27 – 1.22 (m, 2H), 1.19 (d, *J* = 6.8 Hz, 3H), 1.08 (s, 3H), 0.98 (d, *J* = 6.9 Hz, 3H) ppm. **<sup>13</sup>C-NMR (125 MHz, CDCl<sub>3</sub>):** δ = 220.6, 204.9, 170.7, 76.8, 74.5, 71.6, 62.4, 62.1, 53.4, 42.7, 39.9, 37.4, 32.8, 31.2, 28.9, 26.3, 23.2, 22.5, 22.4, 18.0, 17.2, 14.4 ppm. **R<sub>f</sub>** = 0.28 (EA:Hex = 1:1). **LRMS (ESI, positive):** calc for C<sub>22</sub>H<sub>37</sub>O<sub>7</sub><sup>+</sup> [M+H]<sup>+</sup> 413.2534, 413.3 found.

**Synthesis of TES protected methyl ketone 2.**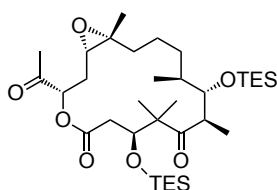

To a stirred solution of methyl ketone **1** (44 mg, 107  $\mu\text{mol}$ , 1 eq) in dry dichloromethane (2 mL) was added 2,6-lutidine (37  $\mu\text{L}$ , 320  $\mu\text{mol}$ , 3 eq) and triethylsilyl trifluoromethanesulfonate (58  $\mu\text{L}$ , 265  $\mu\text{mol}$ , 2.4 eq) at  $-78^\circ\text{C}$ . The reaction mixture was stirred for 30 min, before quenching with water (5 mL) and warming up to room temperature. The reaction mixture was transferred to a separation funnel and the organic layer was separated. The aqueous layer was extracted with EA (3  $\times$  5 mL) and the combined organic layers were dried over  $\text{Na}_2\text{SO}_4$ . The solvent was removed under reduced pressure and purification by normal phase MPLC (10 $\rightarrow$ 20% EA:Hex) afforded desired compound **2** (55 mg, 85.8  $\mu\text{mol}$ , 80%) as colorless foam.  **$^1\text{H-NMR}$  (500 MHz,  $\text{CDCl}_3$ ):**  $\delta$  = 5.01 (dd,  $J$  = 9.9, 2.1 Hz, 1H), 4.04 (dd,  $J$  = 10.0, 2.3 Hz, 1H), 3.91 (d,  $J$  = 9.4 Hz, 1H), 3.02 (dq,  $J$  = 9.2, 6.7 Hz, 1H), 2.91 (dd,  $J$  = 16.3, 2.4 Hz, 1H), 2.84 (dd,  $J$  = 10.1, 4.0 Hz, 1H), 2.75 (dd,  $J$  = 16.4, 10.0 Hz, 1H), 2.35 (ddd,  $J$  = 15.0, 4.1, 2.1 Hz, 1H), 2.22 (s, 3H), 1.70 (ddt,  $J$  = 18.5, 10.1, 4.9 Hz, 2H), 1.63 – 1.53 (m, 2H), 1.52 – 1.43 (m, 2H), 1.38 (d,  $J$  = 12.1 Hz, 1H), 1.27 (s, 3H), 1.22 (s, 3H), 1.15 (s, 3H), 1.07 (d,  $J$  = 6.8 Hz, 3H), 1.05 – 1.01 (m, 1H), 0.99 – 0.96 (m, 12H), 0.91 (t,  $J$  = 7.8 Hz, 9H), 0.64 (q,  $J$  = 7.8 Hz, 6H), 0.58 (q,  $J$  = 7.8 Hz, 6H) ppm.  **$^{13}\text{C-NMR}$  (125 MHz,  $\text{CDCl}_3$ ):**  $\delta$  = 215.2, 203.4, 171.8, 80.2, 76.5, 76.2, 62.5, 62.2, 53.4, 48.5, 39.4, 36.8, 32.0, 31.0, 30.3, 25.9, 24.9, 24.6, 23.6, 22.6, 19.6, 17.8, 7.3, 7.0, 5.7, 5.3 ppm.  **$R_f$**  = 0.53 (EA:Hex = 2:8). **LRMS (ESI, positive):** calc for  $\text{C}_{34}\text{H}_{65}\text{O}_7\text{Si}_2^+$   $[\text{M}+\text{H}]^+$  641.4263, 641.3 found.

**Synthesis of deepoxidised TES protected methyl ketone 3.**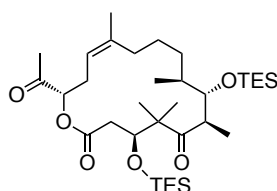

A solution of tungsten hexachloride (27 g, 0.069 mmol, 2.0 eq) in dry THF (2 mL) was cooled to  $-78^\circ\text{C}$  and  $n\text{-BuLi}$  (2.5 M in hexanes, 55  $\mu\text{L}$ , 0.137 mmol, 4.0 eq) was added dropwise. The suspension was stirred for 10 min, before the reaction mixture was warmed to  $25^\circ\text{C}$  and stirred another 30 min. The black suspension was cooled to  $-20^\circ\text{C}$ , and a solution of methyl ketone **2** (0.22 mg, 0.034 mmol, 1.0 eq) in tetrahydrofuran (1 mL) was added dropwise, and the reaction mixture was warmed to  $0^\circ\text{C}$ . After 3 h, the reaction mixture was quenched with sat. aq.  $\text{NH}_4\text{Cl}$  (5 mL), and allowed to warm to room temperature. The reaction mixture was

transferred into a separation funnel and the two phases were separated. The aqueous layer was extracted with ethyl acetate (3 × 5 mL). The combined organic layers were dried over Na<sub>2</sub>SO<sub>4</sub>, filtered and concentrated under reduced pressure. The obtained residue was purified by MPLC purification (0→15% EA:Hex) to afford deepoxidised methyl ketone **3** (10.6 g, 0.017 mmol, 49%) as a colorless oil.

**<sup>1</sup>H-NMR (500 MHz, CDCl<sub>3</sub>):** δ = 5.16 (t, *J* = 8.2 Hz, 1H), 4.84 (d, *J* = 9.7 Hz, 1H), 4.04 (dd, *J* = 10.4, 1.9 Hz, 1H), 3.91 (d, *J* = 9.1 Hz, 1H), 3.08 – 2.96 (m, 1H), 2.92 (dd, *J* = 15.7, 1.8 Hz, 1H), 2.76 (dd, *J* = 16.2, 10.2 Hz, 1H), 2.54 (dt, *J* = 14.7, 9.8 Hz, 1H), 2.42 (t, *J* = 11.0 Hz, 1H), 2.24 (dd, *J* = 14.7, 7.4 Hz, 1H), 2.19 (s, 3H), 1.78 – 1.69 (m, 2H), 1.69 (s, 3H), 1.55 – 1.48 (m, 2H), 1.22 (s, 3H), 1.14 (s, 3H), 1.09 (d, *J* = 6.7 Hz, 3H), 1.07 – 1.02 (m, 2H), 1.01 – 0.96 (m, 12H), 0.88 (t, *J* = 7.9 Hz, 9H), 0.65 (q, *J* = 7.9 Hz, 6H), 0.56 (q, *J* = 7.8 Hz, 6H) ppm. **R<sub>f</sub>** = 0.58 (EA:Hex = 15:85). **LRMS (ESI, positive):** calc for C<sub>34</sub>H<sub>65</sub>O<sub>7</sub>Si<sub>2</sub><sup>+</sup> [M+H]<sup>+</sup> 641.4263, 641.3 found.

## Synthesis of styrylthiazole phosphonates

### Synthesis of styrylthiazole phosphonate **8**:

*General remarks: Synthesis of phosphonate photoswitches was performed with as little purification as possible for time efficiency reasons. It is recommended to remove most of the side products after synthesis of **6**.*

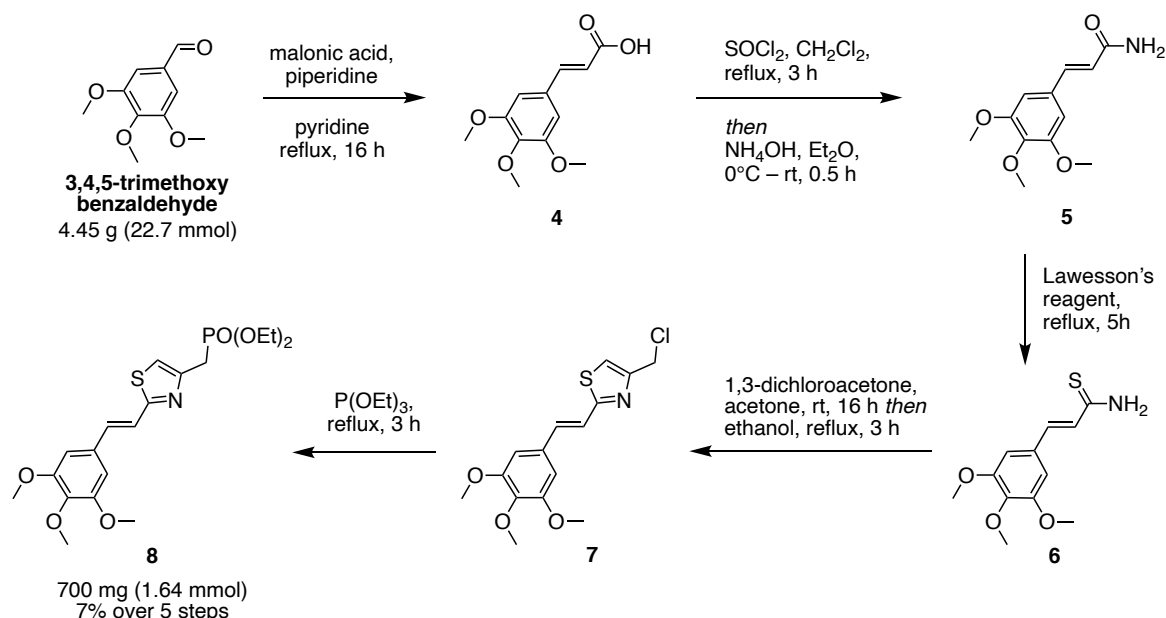

A solution of 3,4,5-trimethoxybenzaldehyde (4.45 g, 22.7 mmol, 1.0 eq.), malonic acid (2.83 g, 27.2 mmol, 1.2 eq) and piperidine (0.5 mL) in pyridine (20 mL) was stirred overnight at reflux. After cooling down to room temperature, the solvent was removed under reduced pressure and redissolved in EA (30 mL). The organic layer was washed with 2 M HCl (15 mL), water

(15 mL) and brine (15 mL), dried over MgSO<sub>4</sub> and filtered to afford cinnamic acid **4** (5.40 g, 22.7 mmol, quant.) without further purification.

**<sup>1</sup>H-NMR (400 MHz, CDCl<sub>3</sub>):** δ = 7.71 (d, *J* = 15.9 Hz, 1H), 6.78 (s, 2H), 6.36 (d, *J* = 15.9 Hz, 1H), 3.90 (s, 6H), 3.90 (s, 3H) ppm. **<sup>13</sup>C-NMR (100 MHz, CDCl<sub>3</sub>):** δ = 172.1, 153.6, 147.2, 140.7, 129.6, 116.5, 105.7, 61.1, 56.3 ppm. **R<sub>f</sub>** = 0.57 (EA:Hex:FA = 1:1:0.01). **HRMS (EI, positive):** calc. for C<sub>12</sub>H<sub>14</sub>O<sub>5</sub><sup>+</sup> [M]<sup>+</sup> 238.0836, found 238.0836.

The cinnamic acid **4** (5.40 g, 22.7 mmol, 1 eq) was dissolved in dichloromethane (100 mL). Thionyl chloride (16.5 mL, 227 mmol, 10 eq.) was added slowly and the reaction mixture was stirred at reflux for 3 h. The solvent was removed under reduced pressure and redissolved in Et<sub>2</sub>O (80 mL) and NH<sub>4</sub>OH (10 mL) was added slowly at 0°C. Stirring was continued for 30 min. The precipitate was washed with Et<sub>2</sub>O several times to give cinnamic amide **5** (4.95 g, 20.9 mmol, 91%).

**<sup>1</sup>H-NMR (400 MHz, DMSO-*d*<sub>6</sub>):** δ = 7.49 (s, 1H), 7.35 (d, *J* = 15.8 Hz, 1H), 7.06 (s, 1H), 6.88 (s, 2H), 6.57 (d, *J* = 15.8 Hz, 1H), 3.80 (s, 6H), 3.67 (s, 3H) ppm. **<sup>13</sup>C-NMR (100 MHz, DMSO-*d*<sub>6</sub>):** δ = 166.9, 153.1, 139.5, 138.7, 130.6, 121.7, 105.0, 60.2, 55.9 ppm. **R<sub>f</sub>** = 0.23 (EA = 100%). **HRMS (ESI, positive):** calc. for C<sub>12</sub>H<sub>16</sub>NO<sub>4</sub><sup>+</sup> [M+H]<sup>+</sup> 238.1074, found 238.1075.

The cinnamic amide **5** (5.40 g, 22.7 mmol, 1 eq) was dissolved in THF (100 mL). Lawesson's reagent (4.95 g, 11.3 mmol, 0.5 eq.) was added portionwise and the reaction mixture was stirred at reflux for 5 h. The solvent was removed under reduced pressure and redissolved in dichloromethane (100 mL) transferred into a separation funnel and washed with 2M HCl (3 × 30 mL) and brine (30 mL), dried over MgSO<sub>4</sub> and filtered. All volatiles were removed by rotary evaporation and filtered. Purification by normal phase MPLC (40→60% EA:Hex, elutes at 60% EA) to remove most of the Lawesson's reagent byproducts afforded cinnamic thioamide **6** (840 mg, 3.32 mmol, 14% over 3 steps).

**<sup>1</sup>H-NMR (400 MHz, CDCl<sub>3</sub>):** δ = 7.71 (d, *J* = 15.8 Hz, 1H), 6.78 (s, 2H), 6.36 (d, *J* = 15.8 Hz, 1H), 3.90 (s, 6H), 3.89 (s, 3H) ppm. **<sup>13</sup>C-NMR (100 MHz, CDCl<sub>3</sub>):** δ = 172.1, 153.6, 147.2, 140.7, 129.6, 116.5, 105.7, 61.1, 56.3 ppm. **R<sub>f</sub>** = 0.26 (EA:Hex = 1:1). **HRMS (ESI, positive):** calc. for C<sub>12</sub>H<sub>16</sub>NO<sub>3</sub>S<sup>+</sup> [M+H]<sup>+</sup> 254.0845, found 254.0847.

A solution of cinnamic thioamide **6** (840 mg, 3.32 mmol, 1 eq) in acetone (25 mL) was added dropwise to a solution of 1,3-dichloroacetone (421 mg, 3.32 mg, 1 eq) in acetone (25 mL) at 50°C. The reaction mixture was allowed to cool down to room temperature and stirred overnight. The acetone was removed under reduced pressure, redissolved in ethanol (30 mL) and refluxed for 3 h. After cooling down to room temperature the solvent was removed *in*

*vacuo* and purified by MPLC (30→40% EA:Hex) to give compound **7** (811 mg, 2.49 mmol, 75%) as slightly yellowish solid.

**<sup>1</sup>H NMR (400 MHz, CDCl<sub>3</sub>):** δ = 7.33 (d, *J* = 16.2 Hz, 1H), 7.24 – 7.16 (m, 2H), 6.76 (s, 2H), 4.69 (d, *J* = 0.7 Hz, 2H), 3.90 (s, 6H), 3.88 (s, 3H) ppm. **<sup>13</sup>C-NMR (100 MHz, CDCl<sub>3</sub>):** δ = 168.0, 153.6, 152.3, 139.5, 136.0, 131.0, 120.1, 116.6, 104.5, 61.1, 56.3, 40.5 ppm. **R<sub>f</sub>** = 0.38 (EA:Hex = 3:7). **HRMS (ESI, positive):** calc. for C<sub>15</sub>H<sub>17</sub>NO<sub>3</sub>CIS<sup>+</sup> [M+H]<sup>+</sup> 326.0612, found 326.0615.

A stirred solution styrylthiazole **7** (811 mg, 2.49 mmol, 1 eq) in triethyl phosphite (6 mL, 35 mmol, 10.5 eq) was heated to 160 °C. After 3 h, the triethyl phosphite was removed under a steady flow of nitrogen gas, and the reaction mixture was allowed to cool to 25°C. The crude material was purified by normal phase MPLC (20→100% EA:Hex, elutes at 100% EA) to give styrylthiazole phosphonate **8** (700 mg, 1.64 mmol, 66%) as yellow oil.

**<sup>1</sup>H-NMR (500 MHz, CDCl<sub>3</sub>):** δ = 7.30 (d, *J* = 16.1 Hz, 1H), 7.19 (dd, *J* = 16.1, 0.7 Hz, 1H), 7.16 (d, *J* = 3.4 Hz, 1H), 6.75 (s, 2H), 4.11 (dq, *J* = 8.3, 7.1 Hz, 4H), 3.90 (s, 6H), 3.87 (s, 3H), 3.40 (dd, *J* = 21.0, 0.8 Hz, 2H), 1.30 (t, *J* = 7.1 Hz, 6H) ppm. **<sup>13</sup>C-NMR (125 MHz, CDCl<sub>3</sub>):** δ = 166.5, 153.6, 147.5, 147.4, 139.1, 134.4, 131.4, 121.0, 115.6, 115.6, 104.3, 62.5, 62.4, 61.1, 56.3, 30.3, 29.1, 16.6, 16.5 ppm. **R<sub>f</sub>** = 0.13 (EA:Hex = 9:1). **HRMS (ESI, positive):** calc. for C<sub>19</sub>H<sub>27</sub>NO<sub>6</sub>PS<sup>+</sup> [M+H]<sup>+</sup> 428.1291, found 428.1293.

### Synthesis of styrylthiazole phosphonate **12a**

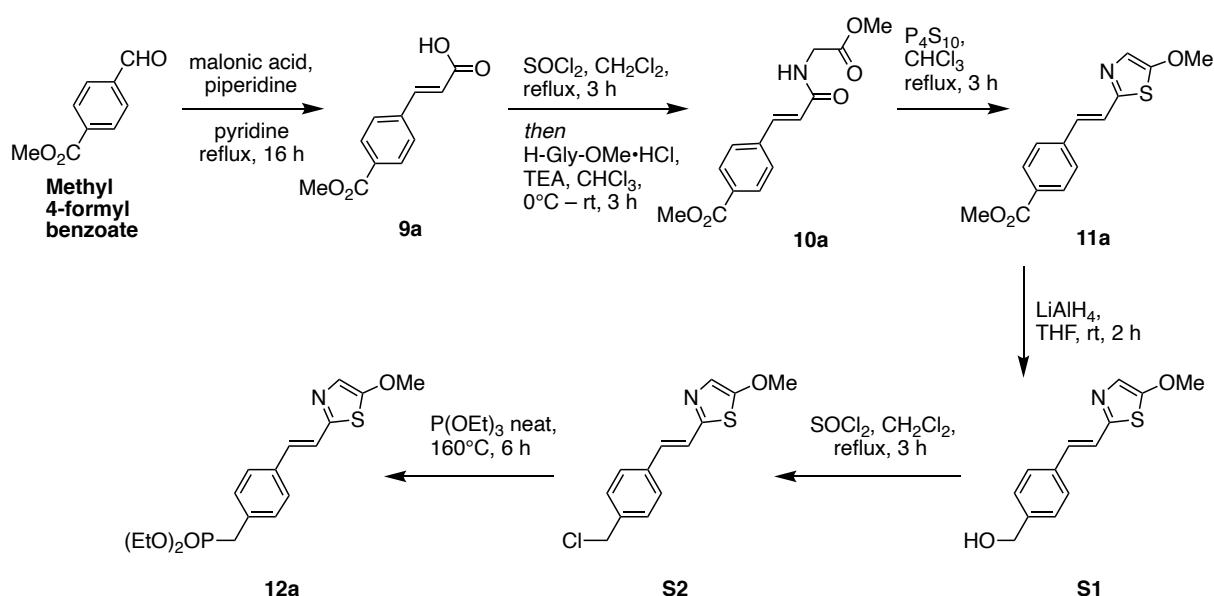

A mixture of methyl 4-formylbenzoate (1.64 g, 10 mmol, 1 eq), malonic acid (1.25 g, 12 mmol, 1.2 eq) and piperidine (99 μL, 1 mmol, 0.1 eq) in pyridine (20 mL) was refluxed overnight. The reaction mixture was cooled down to room temperature, the solvent was removed, redissolved

in EA (30 mL) and transferred into a separation funnel. The organic layer was washed with 2M HCl (2 × 20 mL), water (20 mL) and brine (20 mL). After drying over MgSO<sub>4</sub>, the solvent was filtered and concentrated *in vacuo* to give crude cinnamic acid **9a** (2.06 g, 10 mmol, quant.) as colorless solid, which was directly resuspended in DCM (30 mL). SOCl<sub>2</sub> (7.25 mL, 10 mmol, 1.1 eq) was added in a dropwise manner. The reaction mixture was stirred at reflux for 1.5 h, cooled down to room temperature and all volatiles were removed by rotary evaporation. The residuals were redissolved in CHCl<sub>3</sub> (30 mL) and added slowly to a stirring suspension of glycine methyl ester hydrochloride (1.38 g, 11 mmol, 1.1 eq) and TEA (3.1 mL, 22 mmol, 2.2 eq) at 0°C. The reaction mixture was allowed to warm up to room temperature and stirring was continued for 3 h. The solution was transferred into a separation funnel and washed with water (20 mL) and brine (20 mL), dried over MgSO<sub>4</sub>, filtered and concentrated under reduced pressure to give crude amide **10a**, which was directly redissolved in chloroform (50 mL) and phosphorus pentasulfide (4.45 g, 10 mmol, 1 eq) was added. The reaction mixture was stirred at 80°C for 3 h after cooling down to room temperature the reaction was carefully quenched with 2M NaOH (100 mL) and extracted with EA (5 × 40 mL). The combined organic layers were dried over MgSO<sub>4</sub>, filtered and purified by normal phase MPLC (10→40% EA:Hex) to give styrylthiazole **11a** (678 mg, 2.46 mmol, 25% over three steps) as brown solid.

**<sup>1</sup>H-NMR (500 MHz, CDCl<sub>3</sub>):** δ = 8.02 (d, *J* = 8.4 Hz, 2H), 7.53 (d, *J* = 8.5 Hz, 2H), 7.22 (s, 1H), 7.11 (d, *J* = 16.3 Hz, 1H), 7.09 (d, *J* = 0.8 Hz, 1H), 3.95 (s, 3H), 3.91 (s, 3H) ppm. **<sup>13</sup>C-NMR (125 MHz, CDCl<sub>3</sub>):** δ = 166.8, 163.0, 154.3, 140.5, 130.7, 130.2, 129.8, 126.7, 125.0, 122.2, 61.6, 52.3 ppm. **R<sub>f</sub>** = 0.29 (EA:Hex = 3:7). **HRMS (ESI, positive):** calc. for C<sub>14</sub>H<sub>14</sub>NO<sub>3</sub>S<sup>+</sup> [M+H]<sup>+</sup> 276.0689, found 276.0691.

**11a** (552 mg, 2 mmol, 1 eq) was dissolved in dry THF (20 mL) and LiAlH<sub>4</sub> (2.21 mL, 2.21 mmol, 1.1 eq) was added dropwise at 0°C. The mixture was stirred at room temperature until complete reduction, and then cooled to 0°C, quenched with ice water, and filtered through Celite. The filtrate was dried over MgSO<sub>4</sub> and concentrated *in vacuo* to give benzyl alcohol **S1** (495 mg, 2 mmol, quant.) as colorless solid.

**<sup>1</sup>H-NMR (400 MHz, CDCl<sub>3</sub>):** δ = 7.38 (d, *J* = 8.0 Hz, 2H), 7.26 (d, *J* = 7.9 Hz, 2H), 7.01 (d, *J* = 0.9 Hz, 2H), 6.96 (s, 1H), 4.61 (s, 2H), 3.85 (d, *J* = 0.9 Hz, 3H) ppm. **<sup>13</sup>C-NMR (125 MHz, CDCl<sub>3</sub>):** δ = 162.4, 155.2, 141.4, 135.5, 131.9, 127.6, 127.2, 122.8, 121.8, 65.2, 61.6 ppm. **R<sub>f</sub>** = 0.45 (EA:Hex = 1:1). **HRMS (ESI, positive):** calc. for C<sub>13</sub>H<sub>14</sub>NO<sub>2</sub>S<sup>+</sup> [M+H]<sup>+</sup> 248.0740, found 248.0742.

The benzyl alcohol **S1** (495 mg, 2 mmol, 1 eq) was dissolved in DCM (20 mL) and SOCl<sub>2</sub> (0.73 ml, 10.1 mmol, 5 eq) and DMF (0.5 mL) was added at 0°C. The reaction mixture was

stirred at room temperature for 2 h before all volatiles were removed under reduced pressure and purified by normal phase MPLC (10→80% EA:Hex, elutes at 40% EA) to give benzyl chloride **S2** (460 mg, 1.73 mmol, 87%).

**<sup>1</sup>H-NMR (400 MHz, CDCl<sub>3</sub>):** δ = 7.48 (d, *J* = 8.3 Hz, 2H), 7.39 (d, *J* = 8.3 Hz, 2H), 7.12 (s, 1H), 7.11 (s, 1H), 7.08 (s, 1H), 4.59 (s, 2H), 3.96 (s, 3H) ppm. **<sup>13</sup>C-NMR (125 MHz, CDCl<sub>3</sub>):** δ = 162.5, 154.8, 137.7, 136.2, 131.3, 129.1, 127.1, 123.3, 121.7, 61.4, 45.9 ppm. **R<sub>f</sub>** = 0.45 (EA:Hex = 4:6). **HRMS (ESI, positive):** calc. for C<sub>13</sub>H<sub>13</sub>CINOS<sup>+</sup> [M+H]<sup>+</sup> 266.0401, found 266.0405.

The benzyl chloride **S2** (460 mg, 1.73 mmol, 1 eq) was dissolved in 2 mL triethyl phosphite and stirred at 160°C for 6 h. The solvent was removed over a steady stream of N<sub>2</sub> gas. And the remaining crude was purified over normal phase MPLC (10→100% EA:Hex, elutes at 100% EA) to give phosphonate **12a** (470 mg, 1.28 mmol, 74%) as a yellow oil.

**<sup>1</sup>H-NMR (400 MHz, CDCl<sub>3</sub>):** δ = 7.43 (dd, *J* = 8.4, 1.2 Hz, 2H), 7.29 (dd, *J* = 8.3, 2.5 Hz, 2H), 7.08 (s, 2H), 7.05 (s, 1H), 4.02 (dq, *J* = 8.2, 7.1, 2.0 Hz, 4H), 3.94 (s, 3H), 3.15 (d, *J* = 21.9 Hz, 2H), 1.25 (td, *J* = 7.1, 0.5 Hz, 6H) ppm. **<sup>13</sup>C-NMR (100 MHz, CDCl<sub>3</sub>):** δ = 162.3, 155.0, 134.7, 134.6, 132.2, 132.1, 131.6, 131.6, 130.3, 130.2, 127.0, 127.0, 122.6, 122.6, 121.7, 62.2, 62.2, 61.4, 34.4, 33.0, 16.4, 16.4 ppm. **R<sub>f</sub>** = 0.14 (EA:Hex = 9:1). **HRMS (ESI, positive):** calc. for C<sub>17</sub>H<sub>23</sub>NO<sub>4</sub>PS<sup>+</sup> [M+H]<sup>+</sup> 368.1080, found 368.1083.

### Synthesis of styrylthiazole phosphonate **12b**

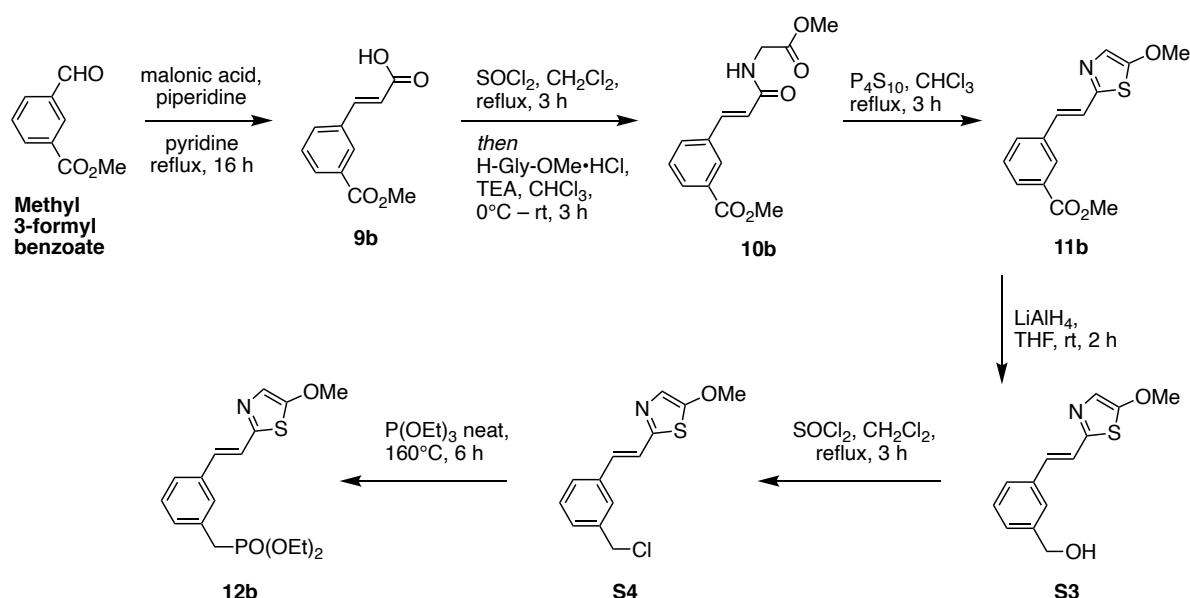

Styrylthiazole **11b** was synthesized following the same procedures for **11a**, starting from Methyl 3-formylbenzoate (2 g, 12.2 mmol, 1 eq) to give **11b** (766 mg, 2.78 mmol, 23% over three steps) as brown solid.



**<sup>1</sup>H-NMR (400 MHz, CDCl<sub>3</sub>):** δ = 8.12 (t, *J* = 1.8 Hz, 1H), 7.91 (ddd, *J* = 7.8, 1.7, 1.2 Hz, 1H), 7.64 – 7.58 (m, 1H), 7.39 (t, *J* = 7.8 Hz, 1H), 7.15 (d, *J* = 16.3 Hz, 1H), 7.08 (d, *J* = 16.3 Hz, 1H), 7.05 (s, 1H), 3.91 (s, 3H), 3.90 (s, 3H) ppm. **<sup>13</sup>C-NMR (100 MHz, CDCl<sub>3</sub>):** δ = 166.7, 162.6, 154.3, 136.3, 130.8, 130.8, 130.7, 129.3, 128.9, 127.9, 123.8, 121.9, 61.4, 52.2 ppm. **R<sub>f</sub>** = 0.51 (EA:Hex = 1:1). **HRMS (ESI, positive):** calc. for C<sub>14</sub>H<sub>14</sub>NO<sub>3</sub>S<sup>+</sup> [M+H]<sup>+</sup> 276.0689, found 276.0687.

Reduction of **11b** (433 mg, 2 mmol, 1 eq) following the same procedure as for benzyl alcohol **S1** gave benzyl alcohol of **S3** (367 mg, 1.48 mmol, 94%).

**<sup>1</sup>H-NMR (500 MHz, CDCl<sub>3</sub>):** δ = 7.50 (s, 1H), 7.42 (d, *J* = 7.6 Hz, 1H), 7.36 (t, *J* = 7.6 Hz, 1H), 7.30 (d, *J* = 7.5 Hz, 1H), 7.13 (d, *J* = 1.8 Hz, 2H), 7.06 (s, 1H), 4.72 (s, 2H), 3.95 (s, 3H) ppm. **<sup>13</sup>C-NMR (125 MHz, CDCl<sub>3</sub>):** 162.5, 155.1, 141.6, 136.4, 131.9, 129.2, 127.2, 126.2, 125.4, 123.1, 121.9, 65.3, 61.6 ppm. **R<sub>f</sub>** = 0.20 (EA:Hex = 3:7). **HRMS (ESI, positive):** calc. for C<sub>13</sub>H<sub>14</sub>NO<sub>2</sub>S<sup>+</sup> [M+H]<sup>+</sup> 248.0740, found 248.0739.

Chlorination of benzyl alcohol of **S3** (330 mg, 1.33 mg, 1 eq) was obtained following the same the same procedure as for benzyl chloride **S2** to yield benzyl chloride **S4** (315 mg, 1.19 mmol, 89%).

**<sup>1</sup>H-NMR (400 MHz, CDCl<sub>3</sub>):** δ = 7.50 (d, *J* = 1.8 Hz, 1H), 7.45 (dt, *J* = 7.5, 1.6 Hz, 1H), 7.36 (t, *J* = 7.5 Hz, 1H), 7.32 (dt, *J* = 7.7, 1.6 Hz, 1H), 7.15 (d, *J* = 16.2 Hz, 1H), 7.10 (d, *J* = 16.1 Hz, 2H), 4.60 (s, 2H), 3.96 (s, 3H) ppm. **<sup>13</sup>C-NMR (100 MHz, CDCl<sub>3</sub>):** δ = 162.6, 154.8, 138.2, 136.7, 131.4, 129.4, 128.7, 127.1, 126.8, 123.5, 122.0, 61.6, 46.1 ppm. **R<sub>f</sub>** = 0.49 (EA:Hex = 3:7). **HRMS (ESI, positive):** calc. for C<sub>13</sub>H<sub>13</sub>ClNOS<sup>+</sup> [M+H]<sup>+</sup> 266.0401, found 266.0400.

Styrylthiazole phosphonate **12b** was synthesized from the benzyl chloride of **S4** (315 mg, 1.19 mmol, 1 eq), following the same procedure as for phosphonate **12a** to obtain desired product **12b** (211 mg, 0.574 mmol, 49%) as yellow oil.

**<sup>1</sup>H-NMR (400 MHz, CDCl<sub>3</sub>):** δ = 7.43 – 7.34 (m, 2H), 7.31 (t, *J* = 7.6 Hz, 1H), 7.24 (ddt, *J* = 7.6, 2.9, 1.5 Hz, 1H), 7.10 (s, 1H), 7.10 (s, 1H), 7.06 (s, 1H), 4.03 (dq, *J* = 8.3, 7.1, 2.1 Hz, 4H), 3.94 (s, 3H), 3.16 (d, *J* = 21.6 Hz, 2H), 1.25 (t, *J* = 7.1 Hz, 6H) ppm. **<sup>13</sup>C-NMR (100 MHz, CDCl<sub>3</sub>):** δ = 162.4, 154.9, 136.3, 136.3, 132.5, 132.4, 131.8, 130.1, 130.0, 129.1, 129.1, 128.4, 128.4, 125.3, 125.3, 123.0, 121.8, 62.3, 62.2, 61.5, 34.5, 33.1, 16.5, 16.5 ppm. **R<sub>f</sub>** = 0.12 (EA:Hex = 9:1). **HRMS (ESI, positive):** calc. for C<sub>17</sub>H<sub>23</sub>NO<sub>4</sub>PS<sup>+</sup> [M+H]<sup>+</sup> 368.1080, found 368.1083.

## Synthesis of SBTax

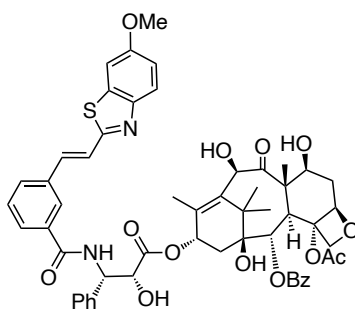

A flask was charged with docetaxel (19 mg, 24  $\mu\text{mol}$ , 1 eq) and DCM (2 mL) and the solution was stirred at 0°C for 2 min. TFA (2 mL) was added and the mixture was stirred at 0°C for 1 hour. The solution was added into rapidly stirred sat. aq.  $\text{NaHCO}_3$  (15 mL). Solid  $\text{NaHCO}_3$  was added until all TFA was neutralized. The mixture was extracted with DCM ( $3 \times 10$  mL). The combined organic layers were washed with sat. aq.  $\text{NaHCO}_3$  (10 mL), brine (10 mL), dried on  $\text{Na}_2\text{SO}_4$ , filtered and concentrated to give crude deprotected docetaxel as a colorless foam. The crude was dissolved in DMF (1 mL). The SBT photoswitch (22.4 mg, 72  $\mu\text{mol}$  3 eq) was dissolved in DMF (1 mL),  $\text{HOBt} \cdot \text{H}_2\text{O}$  (8.1 mg, 60  $\mu\text{mol}$ , 2.5 eq) and EDCI (8.4 mg, 54  $\mu\text{mol}$ , 2.25 eq) were added and the solution stirred at room temperature for 5 min. DIPEA (25  $\mu\text{L}$ , 144  $\mu\text{mol}$ , 6.0 eq) was added and stirring was continued for 10 min. The solution of crude deprotected docetaxel was added and the solution was stirred for 12 h at room temperature, then poured into 10% aq.  $\text{NaHCO}_3$  (20 mL) and extracted with DCM ( $3 \times 10$  mL). The combined organic layers were washed with sat. aq.  $\text{NaHCO}_3$  (10 mL), sat. aq.  $\text{LiCl}$  (10 mL), brine (10 mL), dried on  $\text{Na}_2\text{SO}_4$ , filtered and concentrated to a yellow solid. Chromatography on silica (EA:Hex = 3:7  $\rightarrow$  1:1 then DCM:MeOH = 1:0  $\rightarrow$  9:1) yielded **SBTax** as a colorless solid (6 mg, 6  $\mu\text{mol}$ , 25%).

**$^1\text{H-NMR}$  (400 MHz,  $\text{CDCl}_3$ ):**  $\delta$  = 8.14 (d,  $J$  = 7.3 Hz, 2H), 7.92 (s, 1H), 7.86 (d,  $J$  = 9.0 Hz, 1H), 7.73 (d,  $J$  = 7.8 Hz, 1H), 7.67 (d,  $J$  = 7.8 Hz, 1H), 7.61 (t,  $J$  = 7.3 Hz, 1H), 7.54 – 7.30 (m, 10H), 7.20 (d,  $J$  = 9.0 Hz, 1H), 7.07 (dd,  $J$  = 9.0, 2.5 Hz, 1H), 6.25 (t,  $J$  = 8.8 Hz, 1H), 5.85 – 5.79 (m, 1H), 5.69 (d,  $J$  = 7.1 Hz, 1H), 5.20 (s, 1H), 4.96 (d,  $J$  = 9.3 Hz, 1H), 4.81 (s, 1H), 4.35 – 4.17 (m, 4H), 3.93 (d,  $J$  = 7.1 Hz, 1H), 3.89 (s, 3H), 3.64 (s, 1H), 2.61 (dt,  $J$  = 14.9, 8.1 Hz, 1H), 2.42 (s, 3H), 2.31 (t,  $J$  = 8.8 Hz, 2H), 1.89 (t,  $J$  = 12.8 Hz, 1H), 1.79 (m, 5H), 1.78 – 1.71 (m, 1H), 1.22 (s, 3H), 1.13 (s, 3H) ppm.  **$^{13}\text{C-NMR}$  (100 MHz,  $\text{CDCl}_3$ ):**  $\delta$  = 211.4, 172.5, 170.9, 167.1, 166.7, 164.2, 158.3, 148.3, 138.1, 136.4, 136.3, 135.9, 135.5, 134.7, 133.9, 130.7, 130.4, 129.5, 129.3, 129.2, 128.9, 128.5, 127.7, 127.2, 125.8, 123.8, 123.6, 116.0, 104.2, 84.3, 81.4, 78.9, 74.9, 74.7, 73.6, 72.5, 72.2, 57.8, 56.0, 55.4, 46.8, 43.2, 37.3, 36.0, 29.9, 26.8, 22.7, 20.6, 14.7, 10.1 ppm.  **$R_f$**  = 0.22 (DCM:MeOH = 97:3). **HRMS (ESI, positive):** calc. for  $\text{C}_{55}\text{H}_{57}\text{N}_2\text{O}_{14}\text{S}^+$   $[\text{M}+\text{H}]^+$  1001.3525, found 1001.3517.

## Synthesis of SBT photoswitch

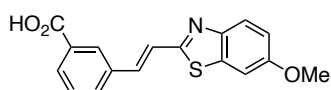

Was prepared following a procedure from Gao et al.<sup>4</sup> from 6-methoxy-2-methylbenzothiazole (358 mg, 2 mmol, 1 eq) and methyl 3-formylbenzoate (328 mg, 2 mmol, 1 eq). A light-yellow solid crashed out of DMSO. The precipitate was collected by filtration and washed with H<sub>2</sub>O (2 × 50 mL), acetone (2 × 50 mL) and methanol (2 × 50 mL). No further purification was needed. The product was obtained as a light-yellow solid (468 mg, 1.49 mmol, 75%).

**<sup>1</sup>H-NMR (400 MHz, DMSO-*d*<sub>6</sub>):** δ = 8.25 (t, *J* = 1.8 Hz, 1H), 8.03 (dt, *J* = 7.9, 1.5 Hz, 1H), 7.93 (dt, *J* = 7.7, 1.3 Hz, 1H), 7.87 (d, *J* = 8.9 Hz, 1H), 7.68 (d, *J* = 2.6 Hz, 1H), 7.66 – 7.63 (m, 2H), 7.56 (t, *J* = 7.7 Hz, 1H), 7.11 (dd, *J* = 8.9, 2.6 Hz, 1H), 3.85 (s, 3H), 2.54 (s, 1H) ppm.

**<sup>13</sup>C-NMR (100 MHz, DMSO-*d*<sub>6</sub>):** δ = 167.0, 163.6, 157.7, 147.9, 135.8, 135.8, 135.3, 131.5, 131.2, 129.8, 129.2, 128.5, 123.2, 123.1, 115.9, 104.8, 55.8 ppm. **R<sub>f</sub>** = 0.30 (DCM:MeOH = 97:3). **HRMS (EI, positive):** calc. for C<sub>17</sub>H<sub>12</sub>NO<sub>3</sub>S<sup>+</sup> [M-H]<sup>+</sup> 310.0532, found 310.0521.

## Analysis of Epothilone binding for *E/Z*-STEpo2/4 activity prediction

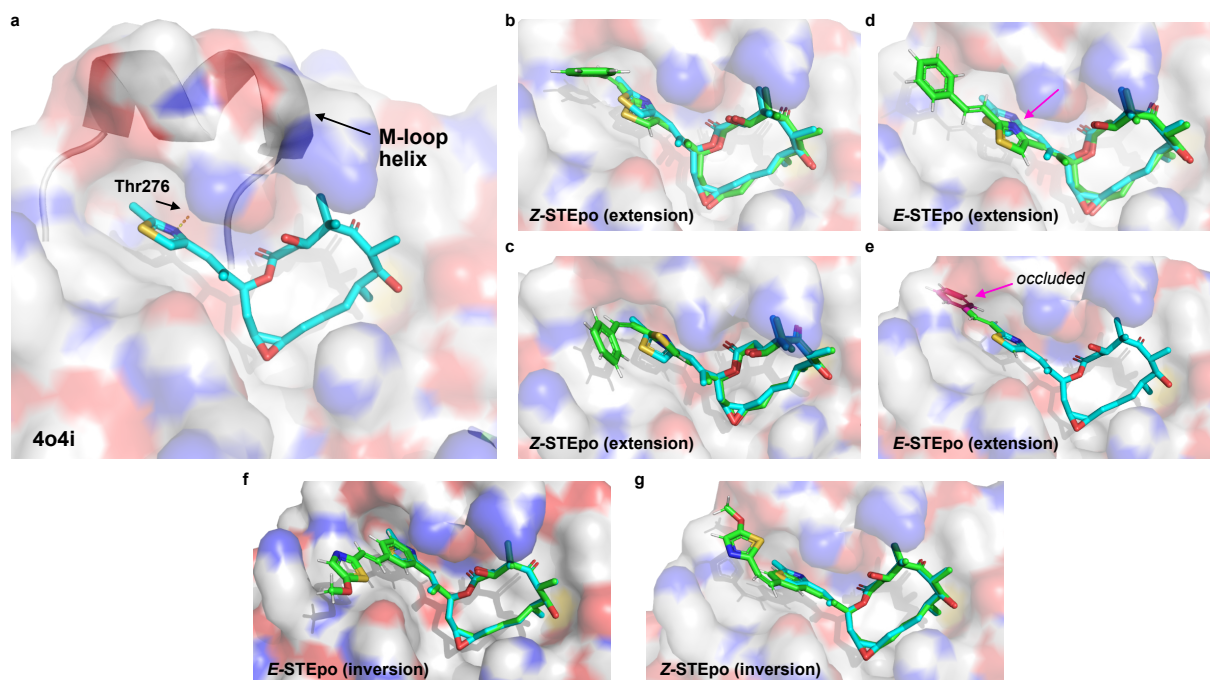

**Fig S1:** Epothilone A:tubulin structure from PDB 4o4i (epothilone carbons in cyan, protein carbons silver) with superimposed non-optimised core structures of STEpo2/4 (carbons green except as noted). **(a)** key H-bond to Thr276 ( $N\cdots HO = 2.6 \text{ \AA}$ ) and the M-loop helix are indicated. **(b-c)** Both possible chiralities of the favoured "sulfur-inside" conformation of the Z-extension design (later: **STEpo2**) seem feasible binding poses that preserve a position of the nitrogen suitable for the H-bond. Note the overall slight changes of thiazole angle and position needed to fit the Z-ST. **(d)** Keeping the nitrogen oriented towards the protein surface for the *E*-extension design requires the *E*-ST photoswitch to swing out due to steric clash to the M-loop, resulting in a  $N\cdots HO$ Thr276 distance of  $4.8 \text{ \AA}$ . **(e)** The pre-minimisation *E*-**STEpo2** core structure occludes the whole phenyl ring entirely inside the M-loop protein volume, so requiring the H-bond-breaking sidechain shift, as in **Fig S1d**. **(f-g)** *meta*-oriented *E/Z*-inversion design (later: **STEpo4**) which does not allow the Thr276 H-bond. **(f)** The *meta*-*E*-inversion isomer is accommodated by projecting the photoswitch out into solvent. **(g)** The *meta*-*Z*-inversion isomer also seems to fit sterically although with a rather close contact of the methoxy oxygen to the protein surface; the flipped projection of the thiazole (towards the viewer) would result in a slightly greater steric clash with the protein surface, although both are too borderline to be clear indicators of fit/mismatch (unlike the clear occlusion mismatch in panel **e**).

Simple models (aids to visualisation only) were created by loading PDB 4o4i (**Fig S1a**) then adding the styryl motif to the epothilone structure (**Fig S1e** shows the result of this for the *E*-extension design) then performing low-computational-cost energy-minimisation structure optimisation with the OPLS3 force field<sup>5-8</sup> in Schrödinger Release 2019-1: Maestro (Schrödinger, LLC, New York, NY, 2019) focusing on the ligand structure and position (**Fig S1b-d**). The thiazole nitrogen position was never constrained.

**It is important to note that** while the ST Z-isomer can theoretically orient the thiazole so either the sulfur or the nitrogen is on the "inside" (closer to the phenyl ring, crowded), the Z-SBTs have a "sulfur-inside" orientation both in crystal structure<sup>4</sup> and as evidenced by structure-activity relationships<sup>9</sup>; this orients the nitrogen accessibly towards the outside. We anticipated that the Z-STs would do likewise; and therefore, that both *E*- and Z-STs should be able to act as H-bond acceptors on their accessible nitrogens. **It will also become important below** that in the extension Z-isomer, a  $180^\circ$  rotation of the thiazole such that the sulfur faces

towards the protein surface is unrealistic: not only does this lose the beneficial H-bond, but since the Z-ST should prefer the "sulfur-inside" orientation, it would cause the distal phenyl ring to clash into the protein surface (continued below).

**Design Part 1:** Using an SBT-like photoswitch (in practice, our recently developed smaller styrylthiazole (ST) photoswitch) to replace the thiazole of epothilones (**Fig 1d-e**) seemed attractive as a rational design basis, for several reasons: (i) Orienting the photoswitch towards the M-loop (**Fig S1a**) has the greatest chance to isomer-dependently affect its helical folding and positioning. Even if the tubulin-binding *affinity* of the *E/Z*-isomers would be similar, differences in their ability to induce M-loop helical folding could be compounded through the thousands of tubulin-tubulin contacts per MT to cause substantial differences in their MT-stabilising potency (a nonlinear system). (ii) An SBT-like photoswitch incorporating an aryl nitrogen could have the exciting opportunity to *E/Z*-dependently alter its H-bond-accepting capacity, which could greatly influence its M-loop-stabilising activity and so its biological potency. This could occur simply by repositioning the nitrogen in and out of range of Thr276 (see e.g. **Fig S1b-d**). (iii) Replacing the thiazole with a photoswitch can, depending on its geometry, also cause an isomer-dependent steric clash with the M-loop that might additionally result in *E/Z*-differences of binding affinity (see e.g. **Fig S1b-e**). (iv) The epothilone scaffold seemed sufficiently water-soluble to support a photoswitch motif, without incurring the limitations seen with the taxanes.

**Design Part 2 - Extension approach:** The "extension approach" maintained the thiazole at its usual position as a potential H-bond acceptor, and extended a styryl residue instead of the methyl group to form an ST photoswitch (**Fig 1e**). In this way, the extension Z-ST could be sterically accommodated, while preserving the Thr276 H-bond, without substantial changes to the M-loop helix (**Fig S1b-c**). However, the corresponding extension *E*-ST would clash into the M-loop (**Fig S1e**) unless the thiazole was either shifted away from Thr276 (**Fig S1d**) or else rotated by 180° so that the *E*-styryl portion could project into solvent (compare **Fig S1f**): but both of these permitted orientations would break the biologically important H-bond. In this way we aimed to design a compound that was more active as the *Z* isomer than the *E*, based essentially on modulating helix induction, rather than binding affinity.

**Design Part 3 - Inversion approach:** An "inversion approach" tested moving the ring nitrogen to the far-side of the ST photoswitch, with phenyl as the near-side ring (**Fig 1e**). This sacrifices the often valuable H-bond to Thr276 in both *E* and *Z* isomers, but allows reorienting the ST photoswitch e.g. in either *meta* or *para* at the phenyl ring.

For the *E-para*-inversion-ST, we expected that the binding pose of the epothilone macrocycle would force a steric clash into the M-loop (similarly as discussed for the extension approach), but that the lesser steric pressure of the *Z-para*-inversion-ST would permit better binding affinity. Therefore we expected the *para*-compounds (later, **STEpo1** and **STEpo3**) to be more active as the *Z* than the *E* isomers (**Fig 2**).

However, the *meta*-inversion-ST (later, **STEpo4**) highlighted new design features.

Since a 2,5-substituted thiazole is a close steric mimic of a *meta*-substituted benzene, the *meta*-inversion isomers can closely sterically match those of the extension design described above, and a comparison between the two is informative. In the extension design, we had anticipated that the *Z*-isomer would orient the thiazole nitrogen, rather than the sulfur, towards Thr276 (**Fig S1b-c**): giving both a sterically tolerated fit and the beneficial H-bond; while its *E*-isomer cannot maintain the H-bond, so we had expected the extension design to be *Z*-active overall. However, in the inversion design, *neither* isomer can benefit from an H-bond since the phenyl ring is not an acceptor (**Fig S1f-g**). This gives a first prediction: since the permitted orientations of their *E*-isomers (see above) essentially overlap, and since neither can perform H-bonding, we would expect that the *E-meta*-inversion and *E-extension* potencies would be identical. Next, we considered the *Z* isomers. According to our analysis, the *Z*-potency of the extension design can be driven by H-bonding, but since the *Z-meta*-inversion design in the same pose cannot perform it (**Fig S1g**), we expected its absolute potency to be many-fold lower (by comparison to literature, e.g.  $\geq 20$ -fold lower<sup>10</sup>). An intriguing complication arises since, compared to the *Z-extension* design, the *Z-meta*-ST has an additional possible pose: rotating its phenyl ring by 180° will project the distal thiazole out into solvent (sterically tolerated, **Fig S1g**), which is allowed for this design since it has no equivalent restriction to the "sulfur-inside" preference. On a very simplistic level, if this extra *Z*-pose had the same affinity as the shared *Z*-pose this would double the *meta* affinity making the *Z-meta*-inversion design perhaps only  $\geq 10$ -fold less potent than the *Z-extension*. These are crude assumptions and are not informed by docking: but *if* they would be supported by experiment, it would suggest that this analysis of the factors determining photoswitchability of bioactivity had captured relevant features that could then be pursued further. (Note however that it cannot be predicted whether or not the *E-meta*-inversion isomer would be more potent than the *Z*.)

**Design Part 4 - ST photoswitch:** While we do not know of studies of substituent effects on ST photochemistry, we reasoned that raising the electron density in the thiazole by including an OMe substituent should shift ST absorption bands helpfully towards the visible. We therefore selected methoxythiazole for the inversion designs **STEpo1/3/4**. (Note too, that when correctly positioned, the vinyl group of the epothilone may also redshift both extension and inversion design spectra).

## Part B: Photocharacterization

Absorption spectra in cuvette (“UV-Vis”) were acquired on a Cary 60 UV-Vis Spectrophotometer from Agilent (1 cm pathlength). For photoisomerisation measurements, Hellma microcuvettes (HL105-200-15-40) taking 150  $\mu\text{L}$  volume to top of optical window were used with the test solution concentrations of 10-20  $\mu\text{M}$ . Measurements were performed in pure DMSO or in PBS/DMSO 1:1 indicated by asterisk.

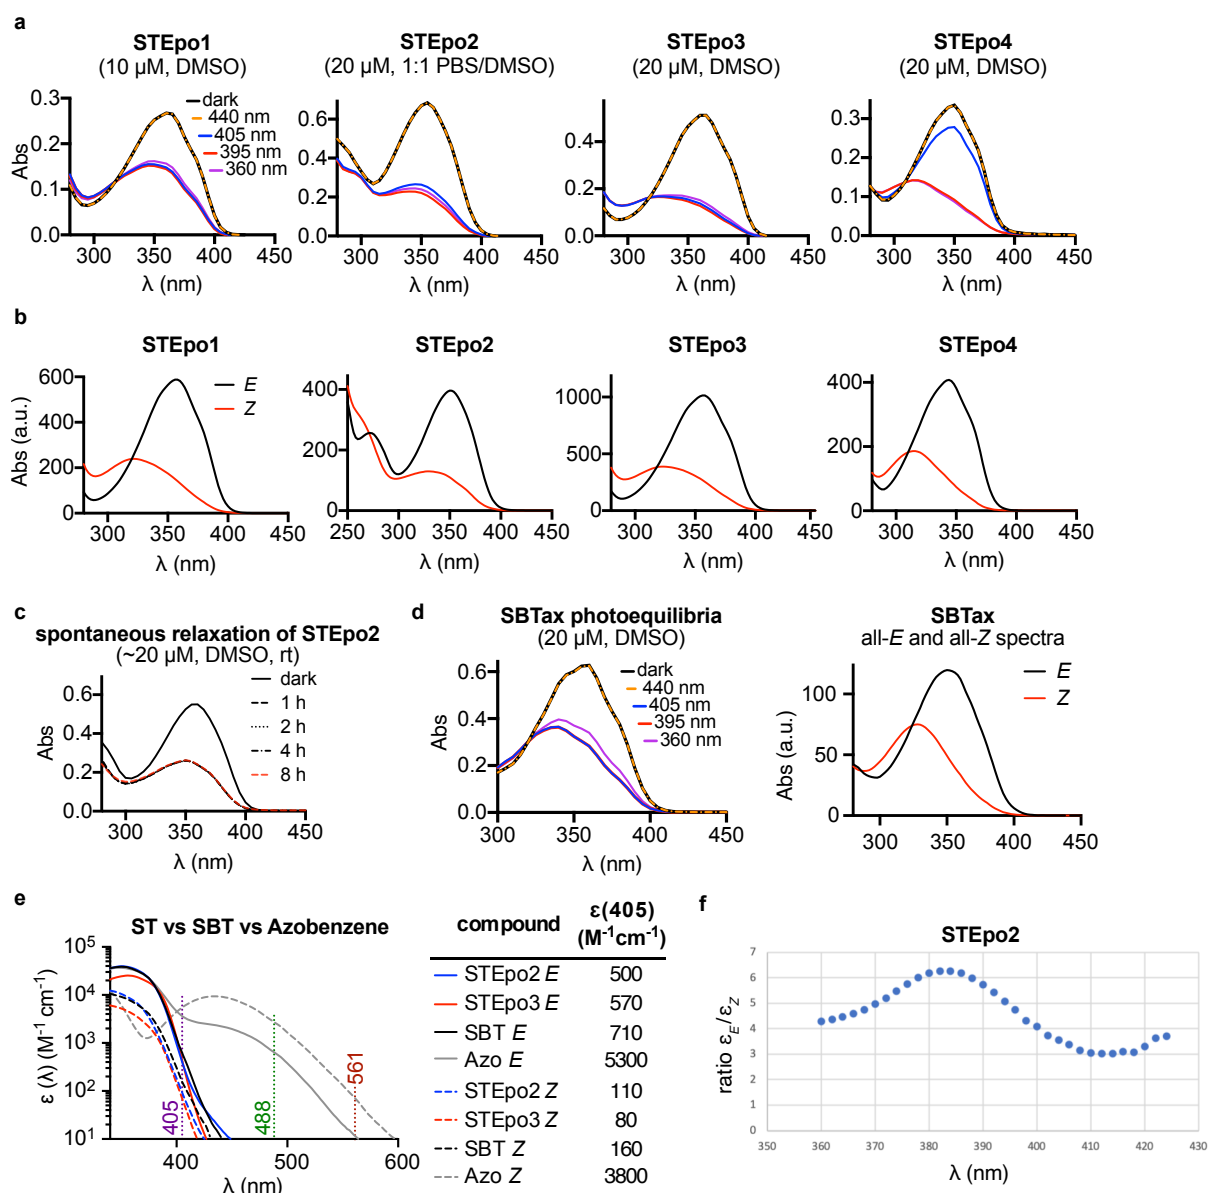

**Fig S2:** (a) UV-Vis spectra of **STEpos** at various photostationary states, shows that the ST photoswitch scaffold photoisomerizes from an all-*E* isomer state to a *Z*-isomer enriched state when irradiated with UV light (~400 nm). (b) all-*E* and all-*Z* spectra obtained from inline HPLC-DAD show that PSS spectra of **STEpos** irradiated with 395 nm photoisomerization (c) **STEpo2** shows no spontaneous relaxation after illumination with 395 nm light at room temperature over 8 hours in DMSO. (d) Photocharacterization of **SBT**ax. (e) Comparison of absorption spectra of *E* and *Z* isomers of **STEpos** with an SBT and a typical *para*-methoxylated azobenzene. At 405 nm, the **STEpos** have approx. two thirds of the absorption coefficient of an SBT photoswitch. The log scale plot highlights the full orthogonality of the ST (and SBT) photoswitches to 488 nm (GFP) or 561 nm (RFP) imaging, whereas the azobenzene is still responsive to high-intensity focused imaging lasers at these wavelengths. (f) Ratio between extinction coefficients  $\epsilon$  of *E*- and *Z*-**STEpo2** in the near-UV range (for analysis of PSS; see SI text below).

Photoisomerisations and relaxation monitoring (**Fig S2c**) were performed at room temperature unless indicated otherwise. Medium-power LEDs (H2A1-models spanning 360–490 nm from Roithner Lasertechnik) were used to deliver high-intensity and relatively monochromatic light (FWHM ~25 nm) into the cuvette, for rapid PSS determinations (**Fig S2a,d**) that were also predictive of what would be obtained in LED-illuminated cell culture. Spectra of pure *E* and *Z* isomers (**Fig S2b**) were acquired from the inline Diode Array Detector during analytical separation on the HPLC (injection of 5-10  $\mu$ L, 5 $\rightarrow$ 100% MeCN:H<sub>2</sub>O over 20 min), after a DMSO stock (0.5 – 2.5mM) was irradiated with a 395 nm LED (~ 5 min) or from the inline Diode Array Detector during **STEpo** purification on the prep-HPLC.

**STEpo quantum yield estimation:** Awad and English performed experimental and QM calculation studies of SBT photochemistry,<sup>11</sup> reporting quantum yields under illumination of the  $\pi\rightarrow\pi^*$  band of 11 $\pm$ 2% for *E* $\rightarrow$ *Z* (solvent-independent) and typically 8 $\pm$ 4% for *Z* $\rightarrow$ *E* (solvent dependent). Though these are not on STEpos, we are confident that they match at least the relative ratios for QYs of STEpos, since in the near-UV the ratio of  $\epsilon_E/\epsilon_Z$  for e.g. **STEpo2** lies between 4-6 (see **Fig S2e**, and compare **Fig 2g**, **Fig S2b**), and assuming 11 and 8% quantum yields, this relative ratio would lead to a near-UV PSS of between 85%-90% *Z*-isomer: which we experimentally observe (typically 85% *Z*-isomer by HPLC, see main text section *Photoisomerisation and GFP-orthogonality*).

**Speed of bulk photoresponse for photoisomerisation vs photouncaging in intended use situations:** The combination of both extinction coefficients and both quantum yields gives the speed of approaching PSS under a given photon flux; and, also, the higher the flux, the faster the approach to PSS. By contrast (see below), for photouncaging under high-intensity illumination as expected on confocal microscopes, the speed of photorelease may still be slow even at "infinite flux" if this is rate-limited by hydrolysis/fragmentation. Our discussion of "fast" and "slow" (main text: "slow kinetics of the hydrolytic step in the photouncaging cascade", "absence of a slow kinetic step in photoresponse") is a conceptual distinction based around this difference. *Microscopically*, photoisomerisations are typically complete on the timescale of picoseconds, maximal nanosecond, i.e. *macroscopically* under infinite flux, photoisomerisations can have nanosecond timescales for reaching PSS. By contrast, photouncaging can be both microscopically and therefore macroscopically rate-limited by post-illumination fragmentation/hydrolysis steps with intermediate halfives of seconds up to minutes for *ortho*-nitrobenzyl / *ortho*-nitrobenzyloxycarbonyl uncaging cascades.<sup>12</sup> The works we cite in the main text contain more discussion of this point.<sup>4,13,14</sup>

## Part C: Biological Data

### Tubulin polymerisation



99% tubulin from porcine brain was obtained from Cytoskeleton Inc. (cat. #T240). The polymerisation reaction was performed at 5 mg/mL tubulin, in polymerisation buffer BRB80 (80 mM piperazine-N,N'-bis(2-ethanesulfonic acid) (PIPES) pH = 6.9; 0.5 mM EGTA; 2 mM MgCl<sub>2</sub>), in a cuvette (120 µL final volume, 1 cm path length) in a Agilent CaryScan 60 with Peltier cell temperature control unit maintained at 37°C; with glycerol (10 µL). Tubulin was first incubated for 10 min at 37°C with "lit"- (395 nm-pre-illuminated; mostly-Z-), dark- (all-E) **STePo** (final concentration 1 µM) or docetaxel (positive ctrl, 10 µM) in buffer with 3% DMSO, without GTP. Then GTP was added to achieve final GTP concentration 1 mM (with mixing), and the change in absorbance at 340 nm was monitored for 15 min, scanning at 15 s intervals.

## General cell culture

HeLa cells were maintained under standard cell culture conditions in Dulbecco's modified Eagle's medium (DMEM; PAN-Biotech: P04-035550) supplemented with 10% fetal calf serum (FCS), 100 U/mL penicillin and 100 U/mL streptomycin. Cells were grown and incubated at 37°C in a 5% CO<sub>2</sub> atmosphere. Cells were typically transferred to phenol red free medium prior to assays (DMEM; PAN-Biotech: P04-03591). Substrates and cosolvent (DMSO; 1% final concentration) were added *via* a D300e digital dispenser (Tecan). Cells were either incubated under "lit" or "dark" conditions; "lit" indicates a pulsed illumination protocol was applied by multi-LED arrays (typically at 360 nm) to create the Z-isomers of the compounds *in situ* in cells and then maintain the wavelength-dependent PSS isomer ratio throughout the experiment, as described previously.<sup>4</sup> Typical "lit" timing conditions were 75 ms pulses of ~1 mW/cm<sup>2</sup> applied every 15 s. **STePo** biostocks were applied in the all-*trans* state (as determined by analytical HPLC) while working under red-light conditions, and stored kept in the dark at 4°C. "Dark" indicates that cells were then incubated in light-proof boxes to shield from ambient light, thereby maintaining the all-*E*-isomer population throughout the experiment.

## Resazurin antiproliferation assay

HeLa cells were seeded in 96-well plates at 5,000 cells/well and left to adhere for 24 h before treating with test compounds. *E*-**STePos** were added for 48 h (final well volume 100 µL, 1% DMSO; three technical replicates); the "cosolvent control" ("ctrl") indicates treatment with DMSO only. Cells were then treated with Resazurin 150 mg/mL for 3 h. Fluorescence was measured at 590 nm (excitation 544 nm) using a FLUOstar Omega microplate reader (BMG Labtech). Absorbance data was averaged over the technical replicates, then normalized to viable cell count from the cosolvent control cells (%control) as 100%, where 0% viability was assumed to correspond to fluorescence signal in PBS only with no cells. Three independent

experiments were performed. Data were plotted against the log of **STEpO** concentration ( $\log_{10}([\text{STEpO}])$  (M)) with mean and SD.

## Immunofluorescence staining

HeLa cells were seeded on glass coverslips in 24-well plates (50,000 cells/well) and treated with **STEpO2** the next day under “dark” or “lit” (360 nm) conditions for 20 h. Cells were fixed and permeabilised in ice-cold methanol for 5 min, then washed and kept in PBS at 4°C until staining. Samples were equilibrated to room temperature and blocked with PBS + 1% BSA for 30 min. Cells were treated with primary antibody (1:200 rabbit alpha-tubulin; abcam ab18251) in PBS/1% BSA/0.1% Triton X-100 overnight and with secondary antibody (1:500 goat-anti-rabbit Alexa Fluor 488; abcam ab150077) in PBS/1% BSA/0.1% Triton X-100 for 1 h. Coverslips were mounted onto glass slides using Roti-Mount FluorCare DAPI (Roth) and imaged with a Zeiss LSM710 confocal microscope (CALM platform, LMU). Images were processed using the free Fiji software<sup>15</sup> and Affinity Designer (Serif) for clarification. Postprocessing was only performed to improve visibility.

## *In vitro* microtubule dynamics imaging

*Reagents:* GMPCPP was obtained from Jena Biosciences. Biotinylated poly(L-lysine)-[g]-poly(ethylene glycol) (PLL-PEG-biotin) was obtained from Susos AG. NeutrAvidin was obtained from Invitrogen. Ethylene glycol-bis(2-aminoethylether)-N,N,N',N'-tetraacetic acid (EGTA), potassium chloride, potassium hydroxide, κ-casein, 1,4-piperazinediethanesulfonic acid (PIPES), GTP, methylcellulose, glucose oxidase from *Aspergillus niger*, catalase from bovine liver, dithiothreitol (DTT), magnesium chloride and glucose were obtained from Sigma-Aldrich. Different types of labeled and unlabeled purified tubulin used in the assays were purchased from Cytoskeleton.

The *in vitro* microtubule dynamics assay was performed as described previously (Bieling et al., 2007; Rai et al., 2020)<sup>16,17</sup>. GMPCPP (a slowly hydrolyzable GTP analog) stabilized microtubule seeds were prepared by two rounds of polymerization and depolymerization in the presence of GMPCPP. A solution of 20 μM porcine brain tubulin mix containing 12% rhodamine-labeled tubulin and 18% biotin-labeled tubulin was polymerized in MRB80 buffer (80 mM K-PIPES, pH 6.8, 4 mM MgCl<sub>2</sub>, 1 mM EGTA) in the presence of GMPCPP (1 mM) at 37°C for 30 min. After polymerization, the mixture was pelleted by centrifugation at 119,000 g for 5 min in an Airfuge centrifuge. The pellet obtained was resuspended in MRB80 buffer and microtubules were depolymerized further on ice for 20 min. The resuspended mixture was again polymerized in the presence of GMPCPP. After the second round of polymerization and

pelletting, GMPCPP-stabilized microtubule seeds were stored in MRB80 in the presence of 10% glycerol.

Microscopy slides with plasma-cleaned glass coverslips were used to prepare *in vitro* flow chambers using two strips of double-sided tape. Flow chambers were sequentially incubated with 0.2 mg/mL PLL-PEG-biotin and 1 mg/mL NeutrAvidin in MRB80 buffer. The chamber was further incubated with GMPCPP stabilized microtubule seeds followed by treatment with 1 mg/ml  $\kappa$ -casein in MRB80 buffer. The reaction mixtures containing 15  $\mu$ M porcine brain tubulin supplemented with 3% rhodamine-tubulin, 20 nM mCherry-EB3, 0.1% methylcellulose, 0.2 mg/mL  $\kappa$ -casein, 50 mM KCl, 1 mM GTP and oxygen scavenger mixture (50 mM glucose, 400  $\mu$ g/mL glucose oxidase, 200  $\mu$ g/mL catalase, and 4 mM DTT in MRB80 buffer) without or with **STEpo2** (50 nM) were added to the flow chambers after centrifugation in an Airfuge for 5 minutes at 119,000 g. The chambers were sealed with vacuum grease and microtubule dynamics was recorded at 30 °C using TIRF microscopy.

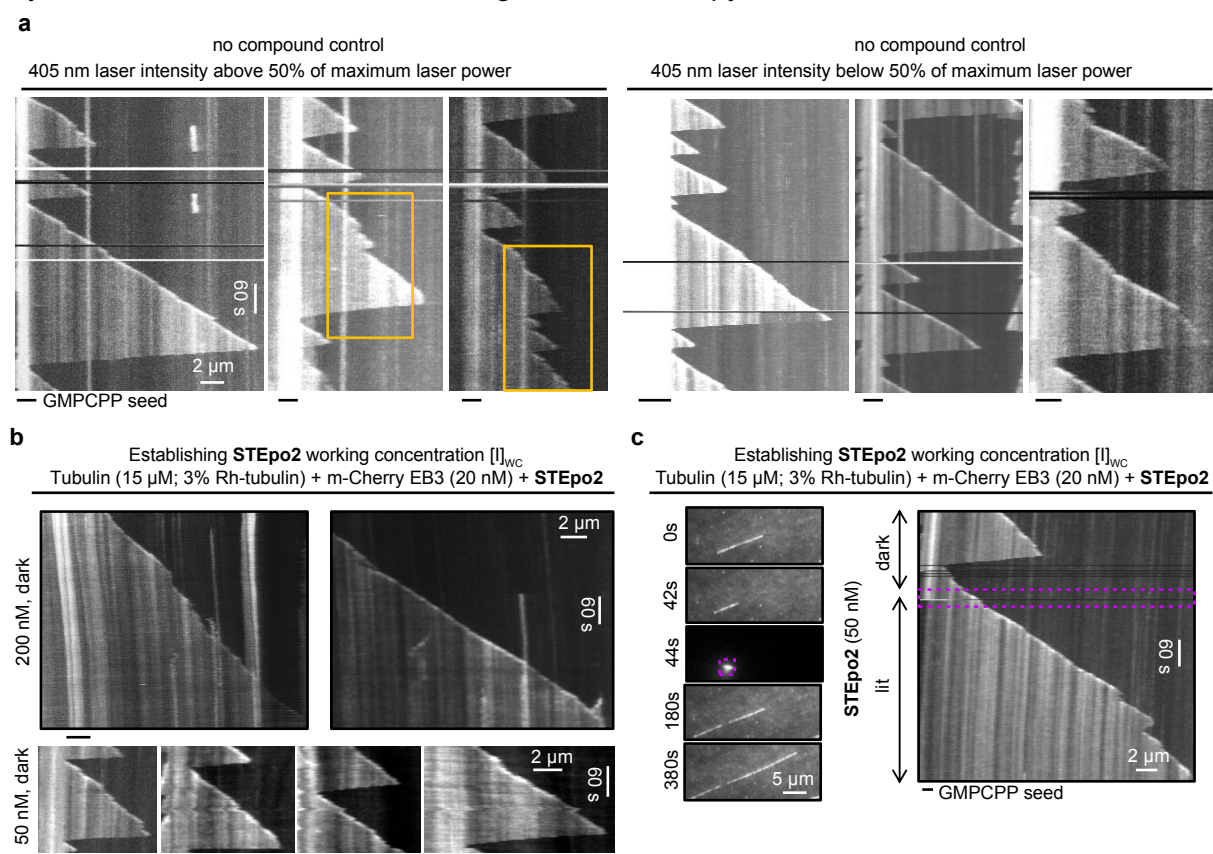

**Fig S3:** (a) Representative kymographs showing MT dynamics during control conditions with different laser intensities of 405 nm. The assay was performed in the presence of tubulin (15  $\mu$ M supplemented with 3% of rhodamine tubulin) and 20 nM m-Cherry EB3. MT were showing some random rescues or catastrophes (yellow boxes) when the laser was used above 50% of maximum laser power. No significant change in microtubule dynamics was observed when the laser was used below 50% of maximum laser power. A laser intensity of 20-30% of maximum laser power was used for the activation of **STEpo2** (two independent experiments). (b) Representative kymographs (two independent experiments) showing microtubule dynamics in the presence of different concentrations of **STEpo2** without 405 nm laser illumination (dark). MT stabilizing dark activity of *E*-**STEpo2** is observed at 200 nM. When decreasing **STEpo2** concentration to 50 nM, MT behave similar to control. 50 nM of **STEpo2** was selected as viable working concentration  $[I]_{WC}$  for light dependent MT stabilization. (c) Time-lapse images and representative kymographs (from three independent experiments) show MT dynamics before (dark) and after (lit) 405 nm photoactivation (20% of maximum laser power, purple box). MT growth events were similar

to control conditions in the presence of **E-STEpo2** (catastrophes reaching to GMPCPP seeds). After 405 nm photoactivation, MT was showing processive growth event with spontaneous rescues indicating activation of microtubule stabilization by **Z-STEpo2**.

#### Image acquisition by TIRF microscopy

Imaging was performed on a TIRF microscope setup (inverted research microscope Nikon Eclipse Ti-E) which was equipped with a perfect focus system (PFS) (Nikon) and Nikon CFI Apo TIRF 100x 1.49 N.A. oil objective (Nikon, Tokyo, Japan). The microscope was supplemented with TIRF-E motorized TIRF illuminator modified by Roper Scientific France/PICT-IBiSA Institut Curie, and a stage top incubator model INUBG2E-ZILCS (Tokai Hit) was used to regulate the temperature of the sample. Image acquisition was performed using Prime BSI sCMOS camera (Teledyne Photometrics, final magnification 0.068  $\mu\text{m}/\text{pixel}$ ) and controlled with MetaMorph 7.7 software (Molecular Devices, CA). Images were captured with 1 frame/2 s in time-lapse mode.

A TIRF microscope equipped with an ILas system (Roper Scientific/PICTIBiSA) was used to photoactivate **STEpo2** with 405 nm light. A region of microtubules was illuminated using a focused laser beam. *In vitro* microtubule dynamics assay was performed in the presence of GMPCPP-stabilized microtubule seeds with 15  $\mu\text{M}$  tubulin, supplemented with 3% rhodamine-tubulin without (control) or with 50 nM **STEpo2**. Kymographs representing the life history of microtubule dynamics were generated using KymoResliceWide v.0.4 (<https://github.com/ekatrakha/KymoResliceWide> (Katrakha, 2015)) plugin in ImageJ (**Fig S3**).

### Live cell microtubule dynamics: imaging

HeLa cells were transfected with EB3-tdTomato using FuGENE 6 (Promega) according to manufacturer's instructions. Experiments were imaged on a Nikon Eclipse Ti microscope equipped with a perfect focus system (Nikon), a spinning disk-based confocal scanner unit (CSU-X1-A1, Yokogawa), an Evolve 512 EMCCD camera (Photometrics) attached to a 2.0 $\times$  intermediate lens (Edmund Optics), a Roper Scientific custom-made set of Vortran Stradus 405 nm (100 mW), 487 nm (150 mW) and Cobolt Jive 561 nm (110 mW) lasers, a set of ET-DAPI, ET-GFP and ET-mCherry filters (Chroma), a motorized stage MS-2000-XYZ, a stage top incubator INUBG2E-ZILCS (Tokai Hit) and lens heating calibrated for incubation at 37°C with 5% CO<sub>2</sub>. Microscope image acquisition was controlled using MetaMorph 7.7 and images were acquired using a Plan Apo VC 40 $\times$  NA 1.3 oil objective. Imaging conditions were initially optimized to minimize tdTomato bleaching and phototoxicity for untreated cells. For compound treated acquisitions 0.6  $\mu\text{M}$  **STEpo2** diluted in prewarmed cell medium was applied to cells in a dark room with only red ambient light, cells were protected from all ambient light after application of drug. Drug was incubated on cells for at least 1 min before commencing

experiment. Comet count analysis was performed in ImageJ using the ComDet plugin (E. Katrukha, University of Utrecht, Netherlands, <https://github.com/ekatrukha/ComDet>).

### **Live cell microtubule dynamics: quantification and statistics**

All relevant assays were done in independent biological replicates. All attempts at replication were successful and no data were excluded from analysis. Blinding was not performed as assay readout is mostly unbiased (plate reader, flow cytometry, Fiji/ImageJ plugins). Microscopic evaluation was performed independently by two separate scientists. Data were analysed using Prism 9 software (GraphPad). Two-tailed unpaired t tests were used in pairwise group comparisons; \* was used for  $P < 0.05$ , \*\* for  $P < 0.01$ , \*\*\* for  $P < 0.001$ , \*\*\*\* for  $P < 0.0001$ .

## Part D: NMR Spectra

### <sup>1</sup>H-NMR of TES protected STEpo1:

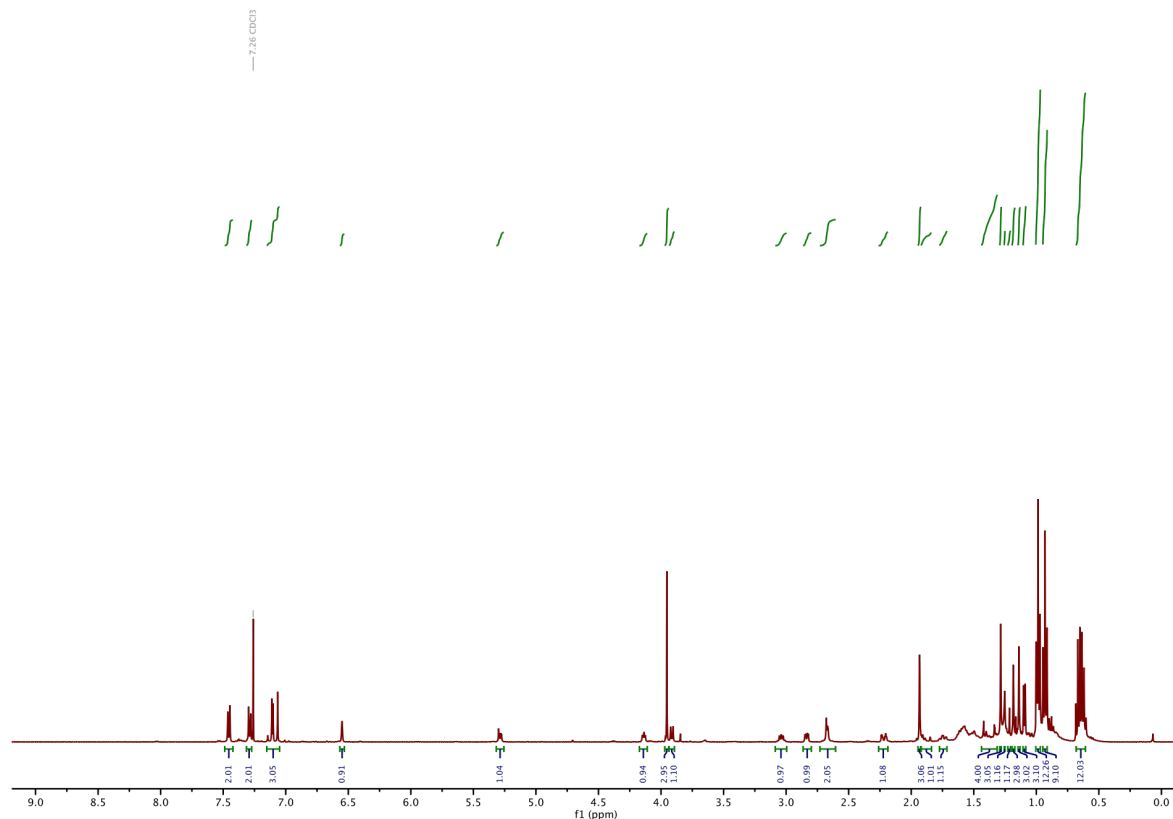

### <sup>13</sup>C-NMR of TES protected STEpo1:

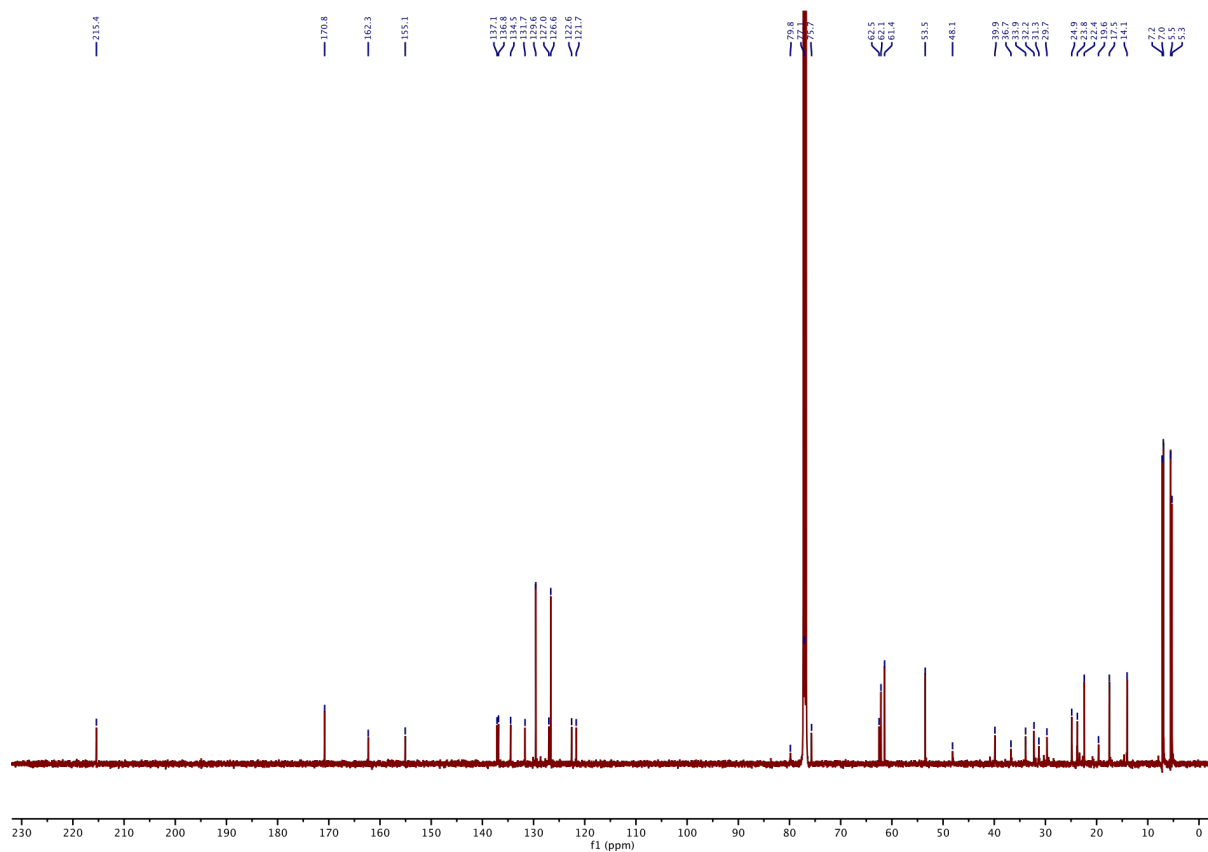

### **<sup>1</sup>H-NMR of STEpo1:**

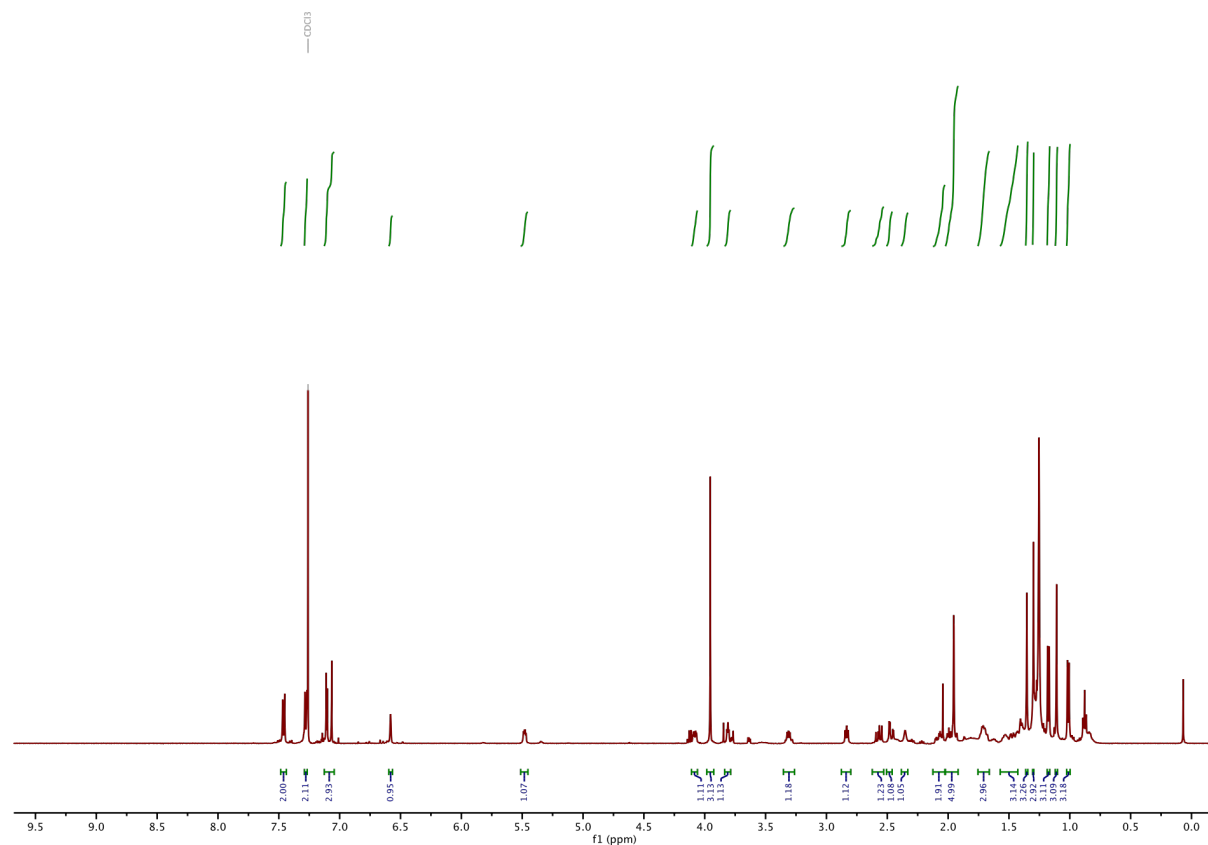

### **<sup>1</sup>H-NMR of TES protected STEpo2:**

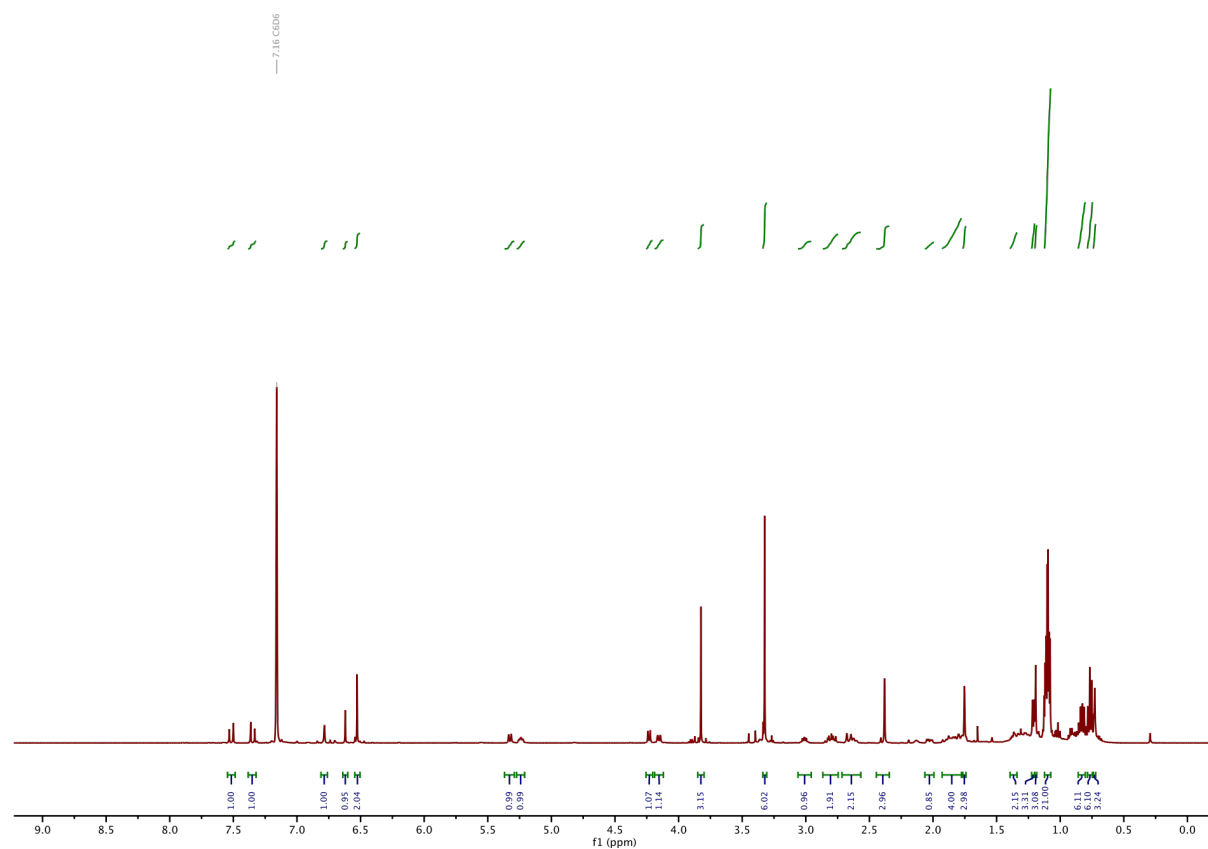

**<sup>13</sup>C-NMR of TES protected STEpo2:**

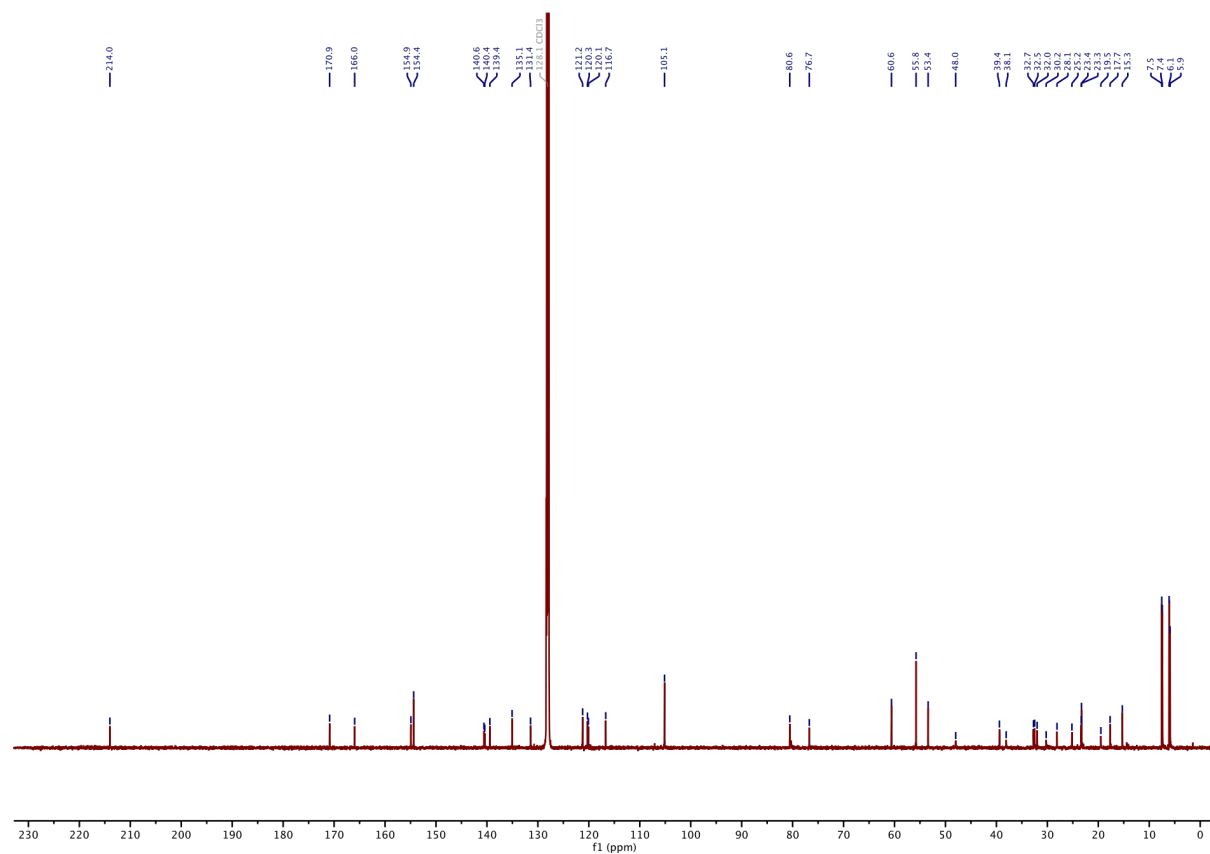

**<sup>1</sup>H-NMR of STEpo2:**

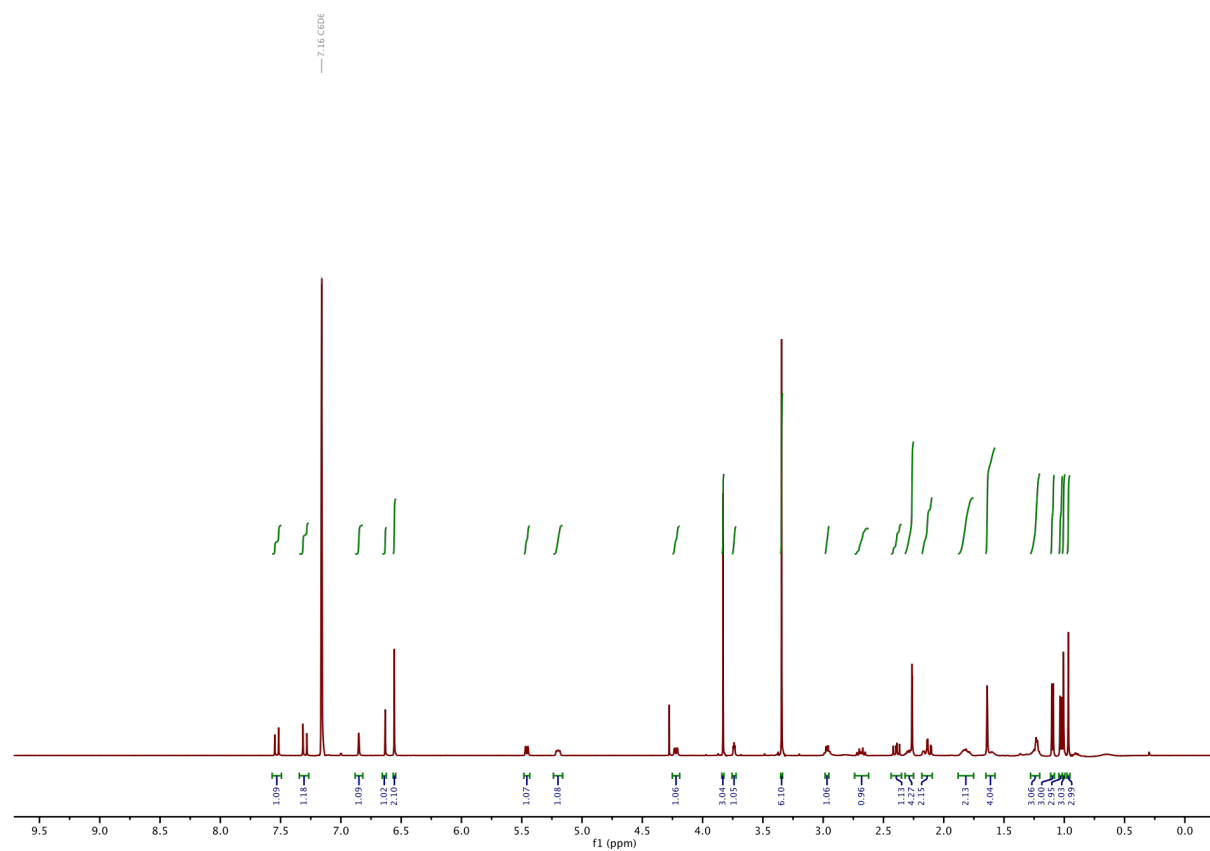



**<sup>13</sup>C-NMR of STEpo2:**

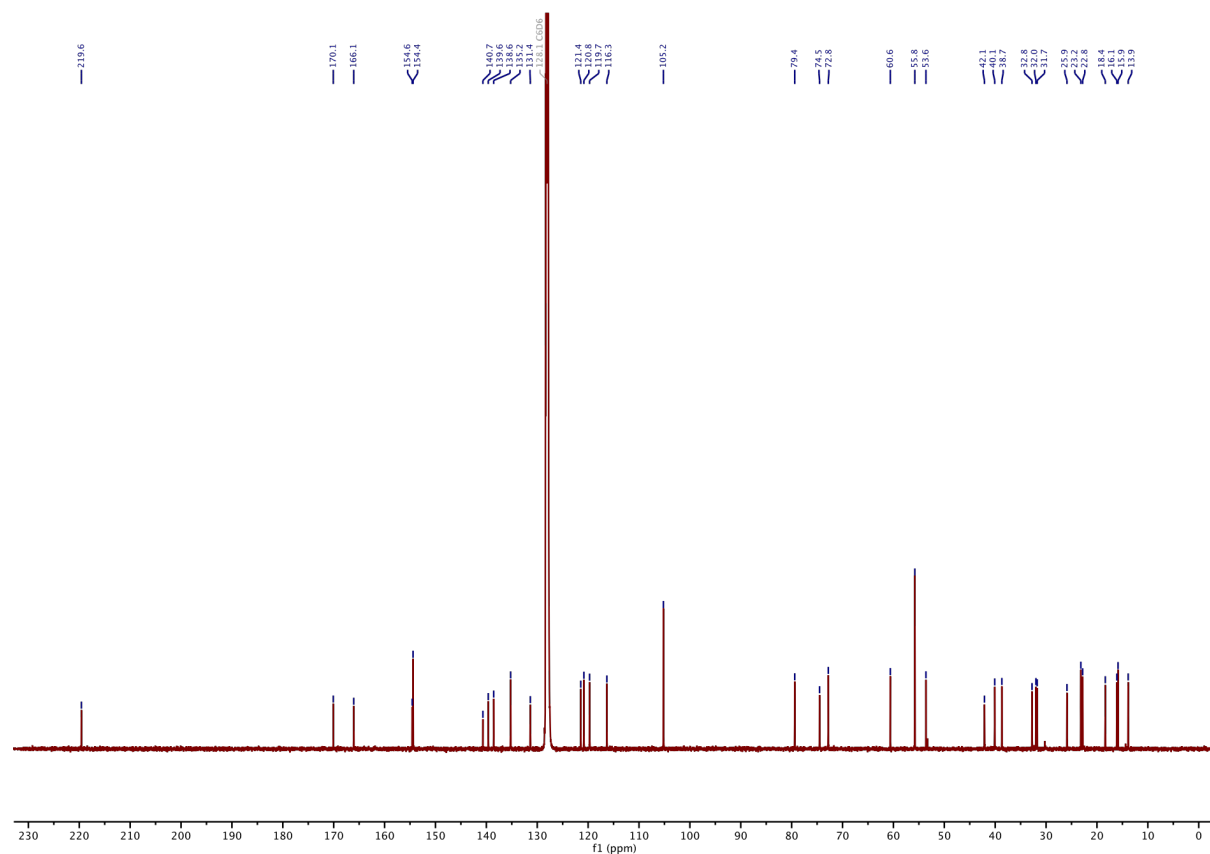

**<sup>1</sup>H-NMR of TES protected STEpo3:**

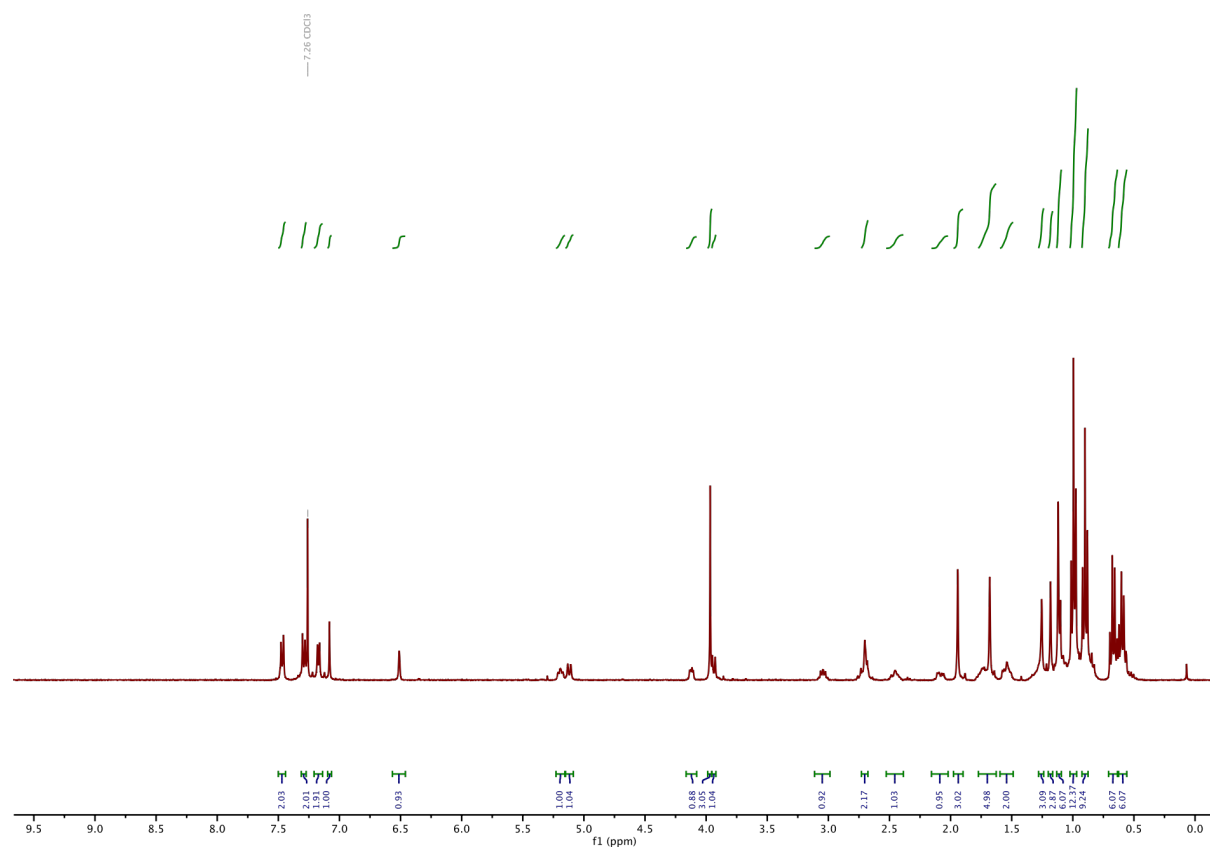

**<sup>13</sup>C-NMR of TES protected STEpo3:**

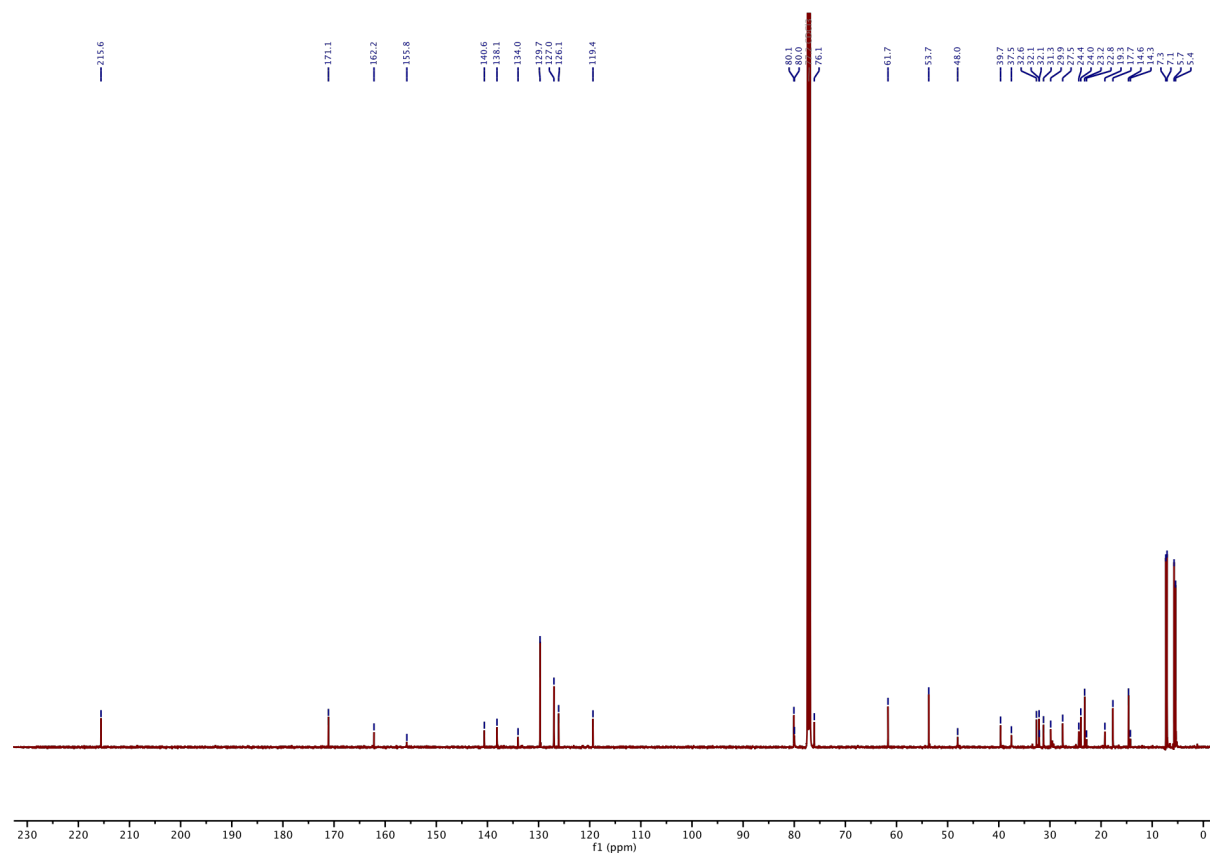

**<sup>1</sup>H-NMR of STEpo3:**

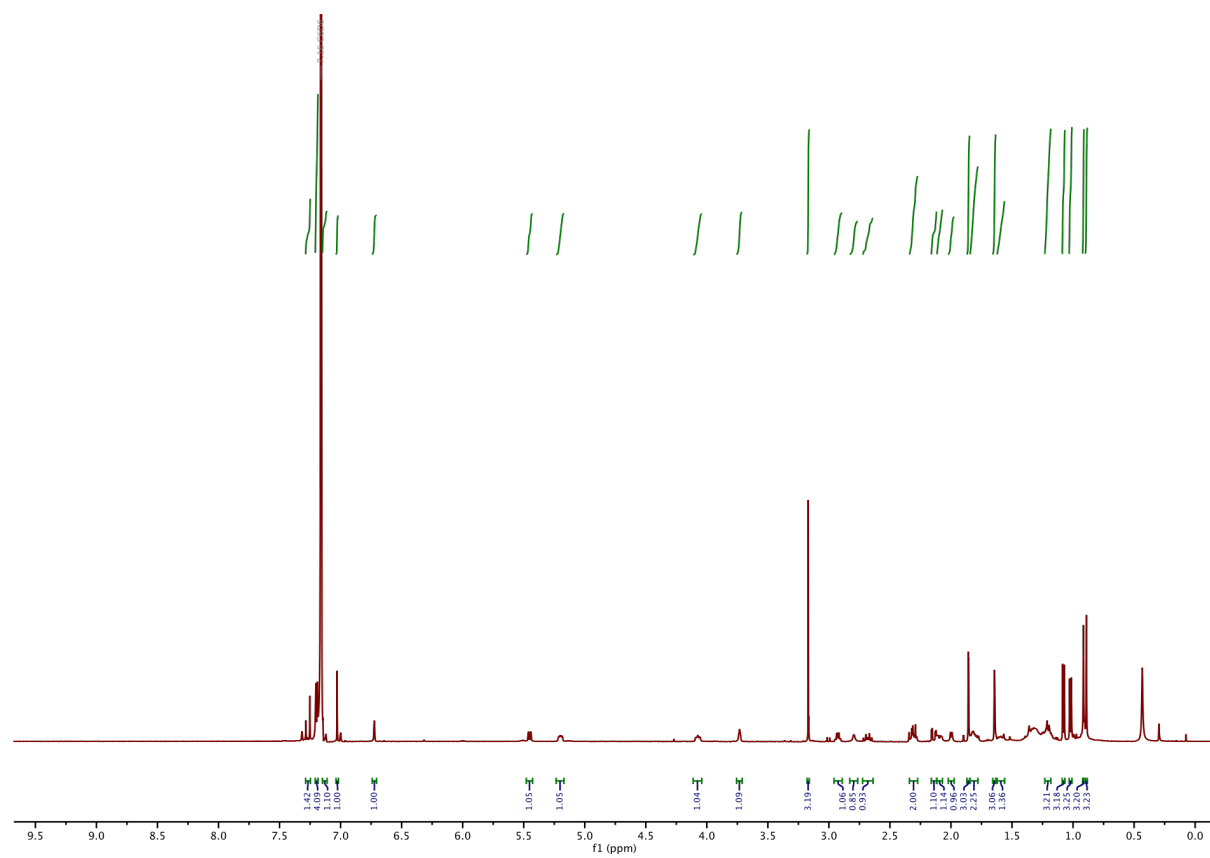

### **<sup>13</sup>C-NMR of STEp03:**

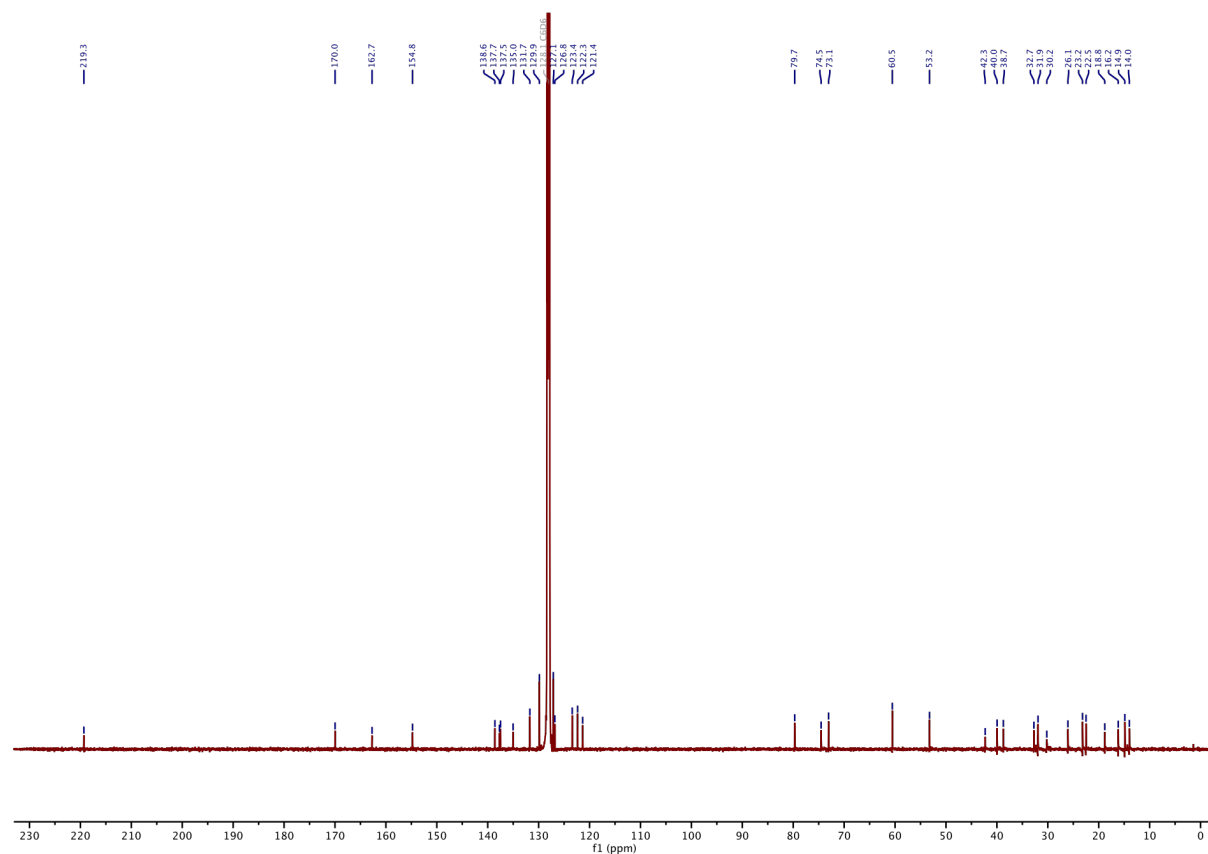

### **<sup>1</sup>H-NMR of STEp04:**

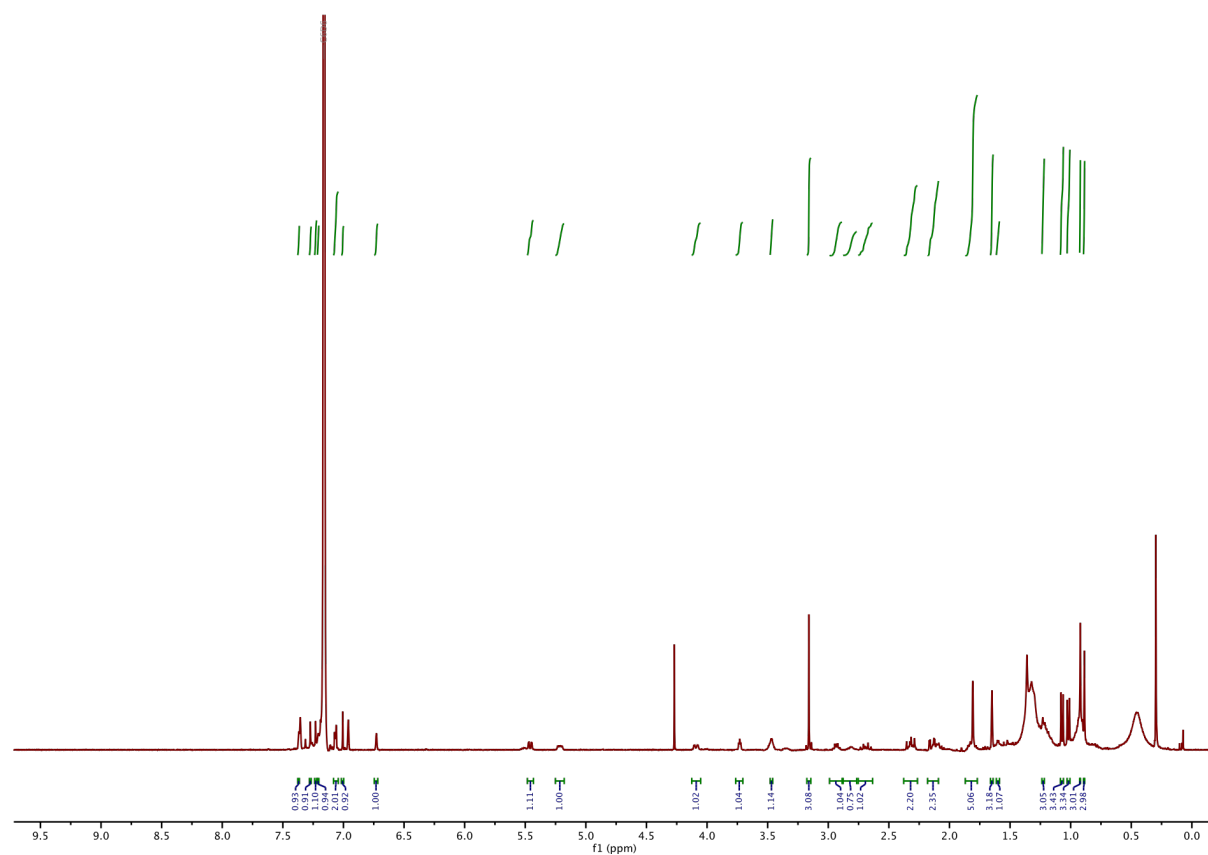

**<sup>1</sup>H-NMR of 1:**

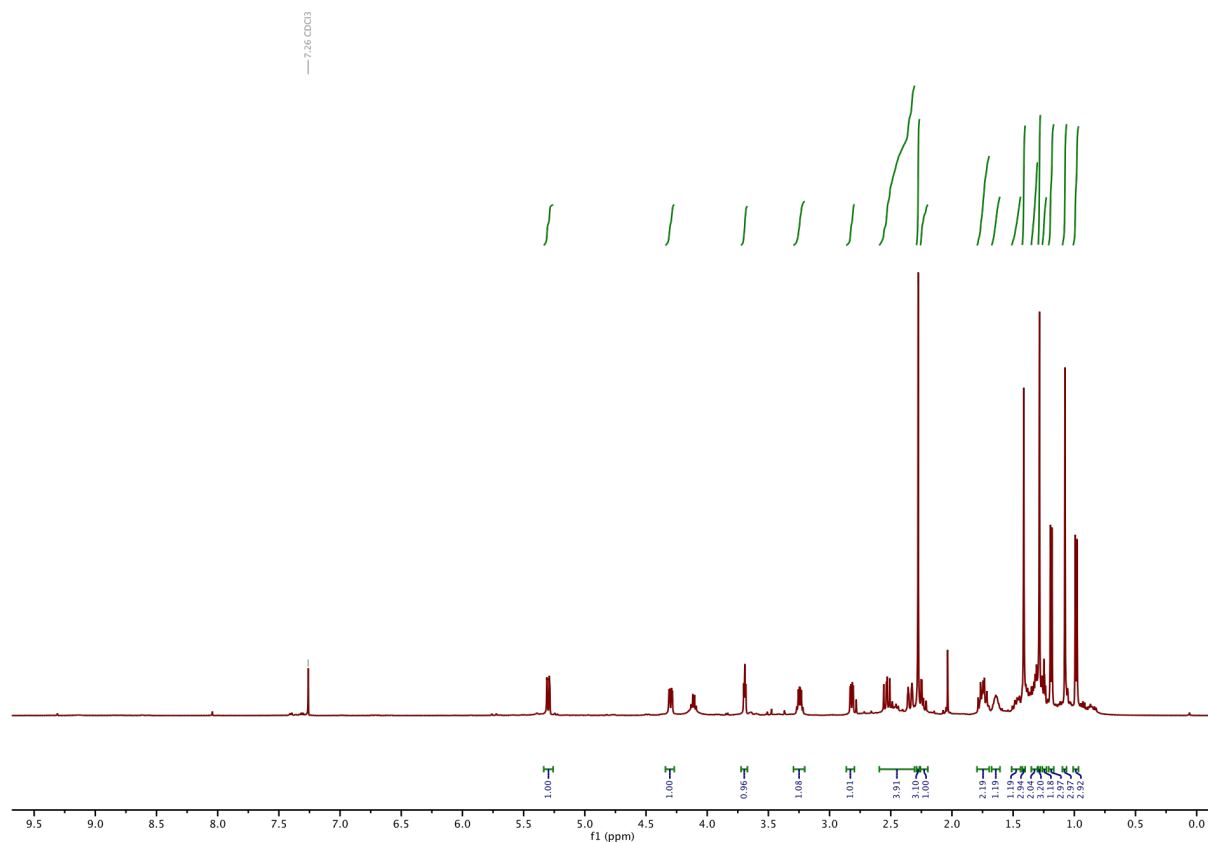

**<sup>13</sup>C-NMR of 1:**

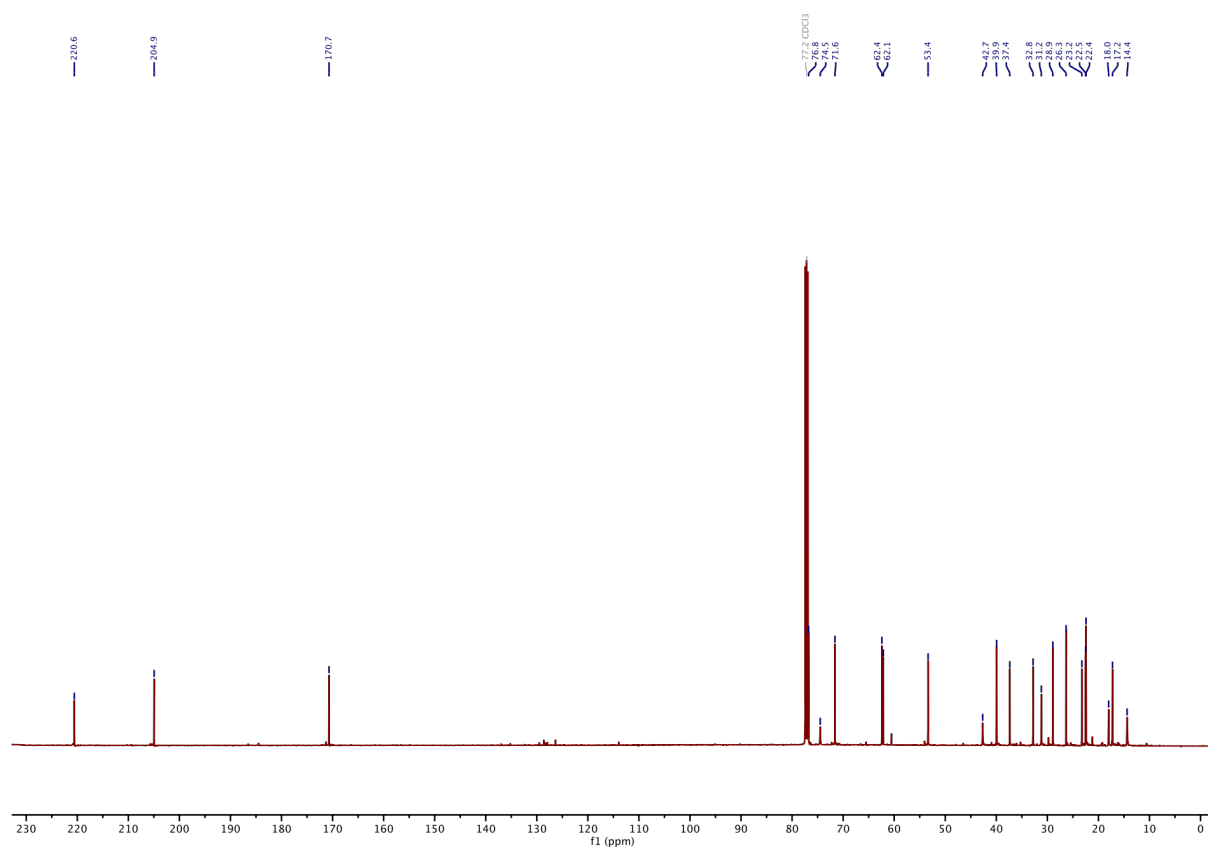

**<sup>1</sup>H-NMR of 2:**

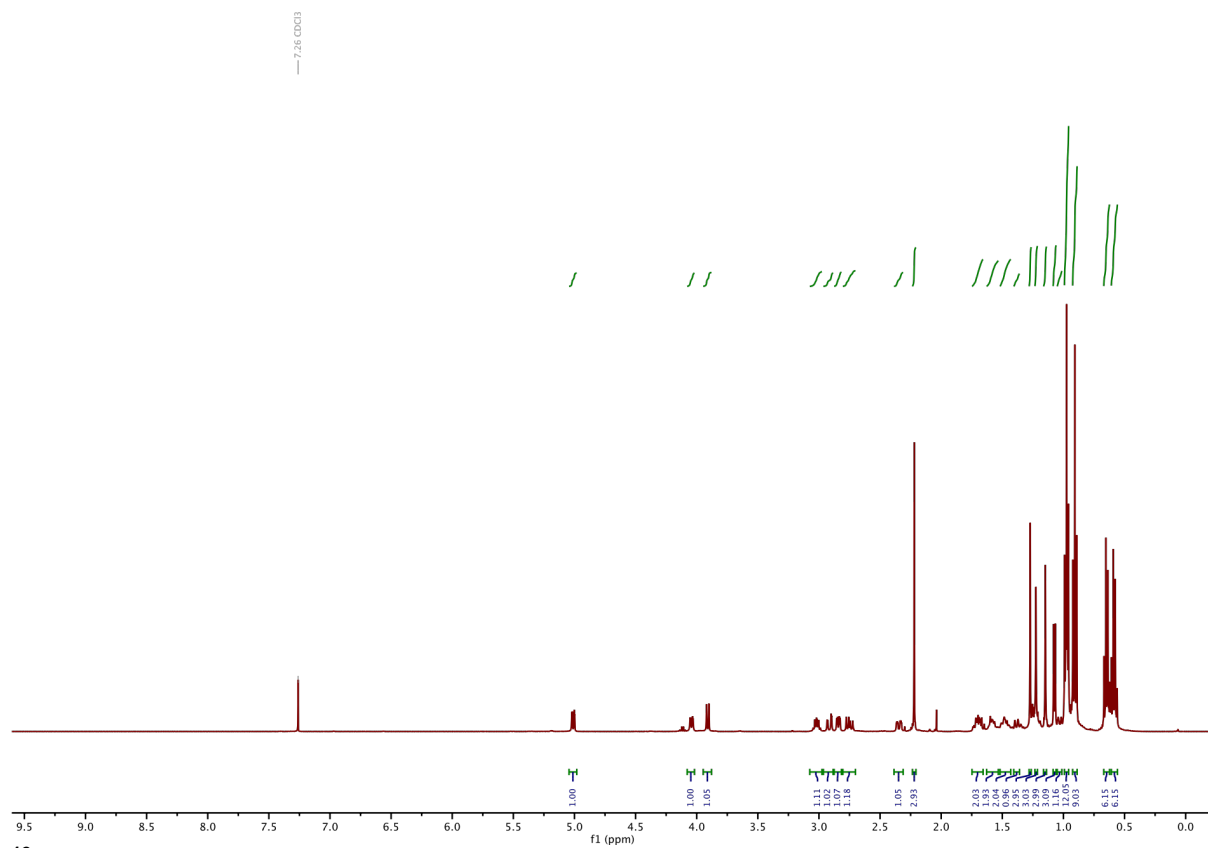

**<sup>13</sup>C-NMR of 2:**

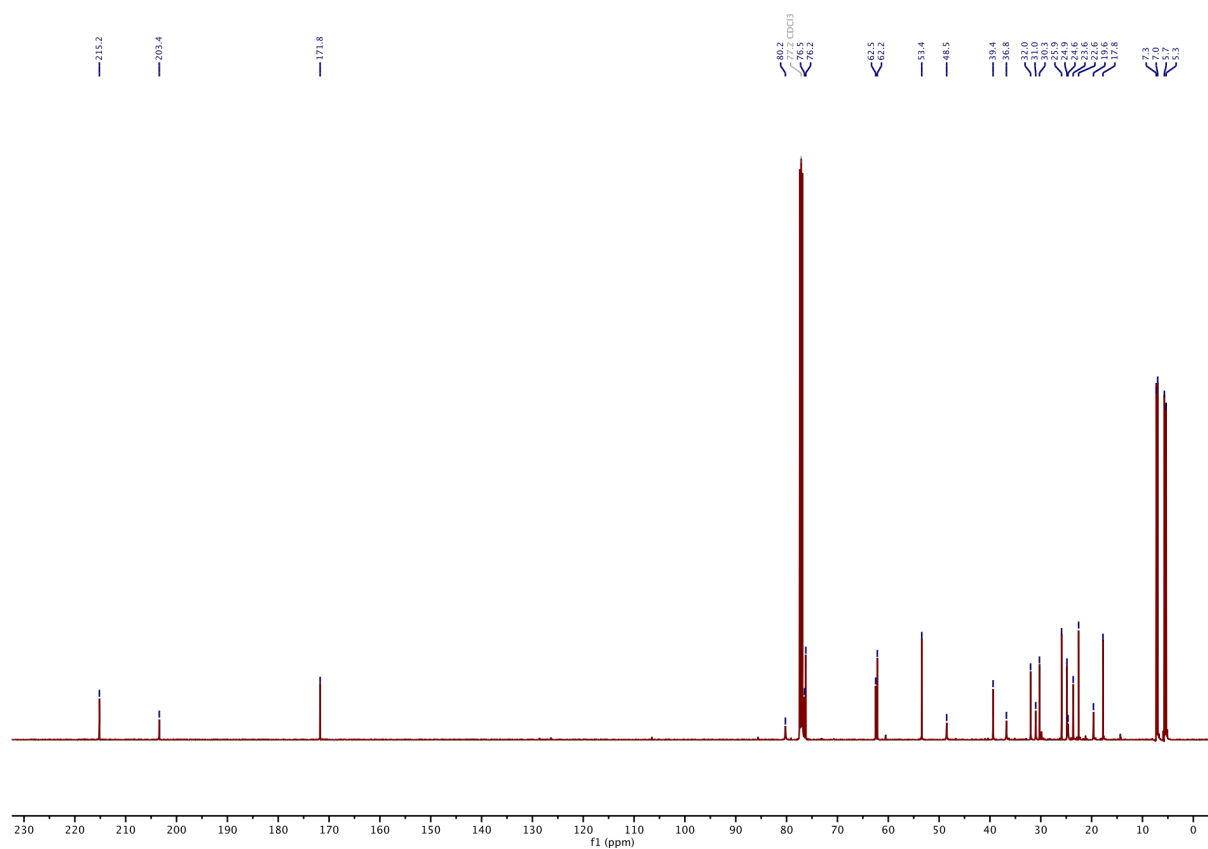

**<sup>1</sup>H-NMR of 3:**

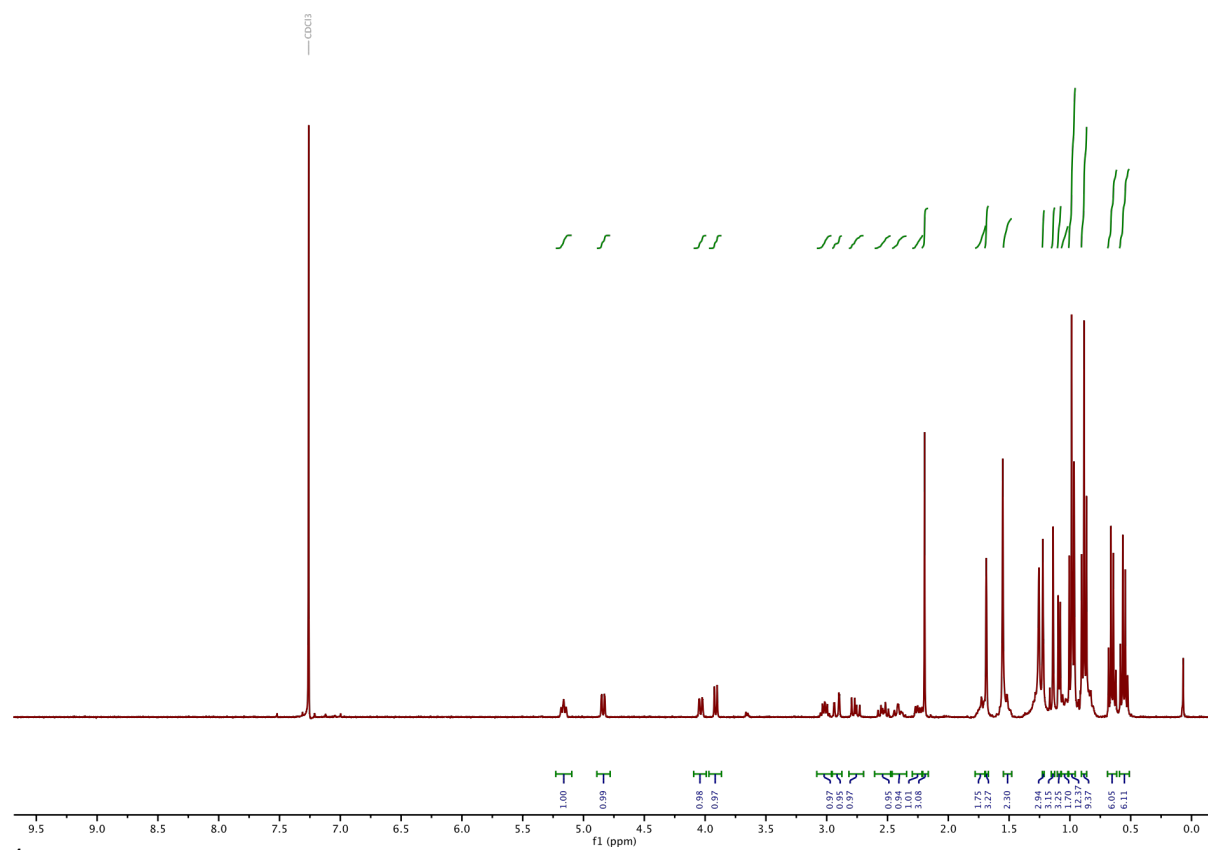

**<sup>1</sup>H-NMR of 4:**

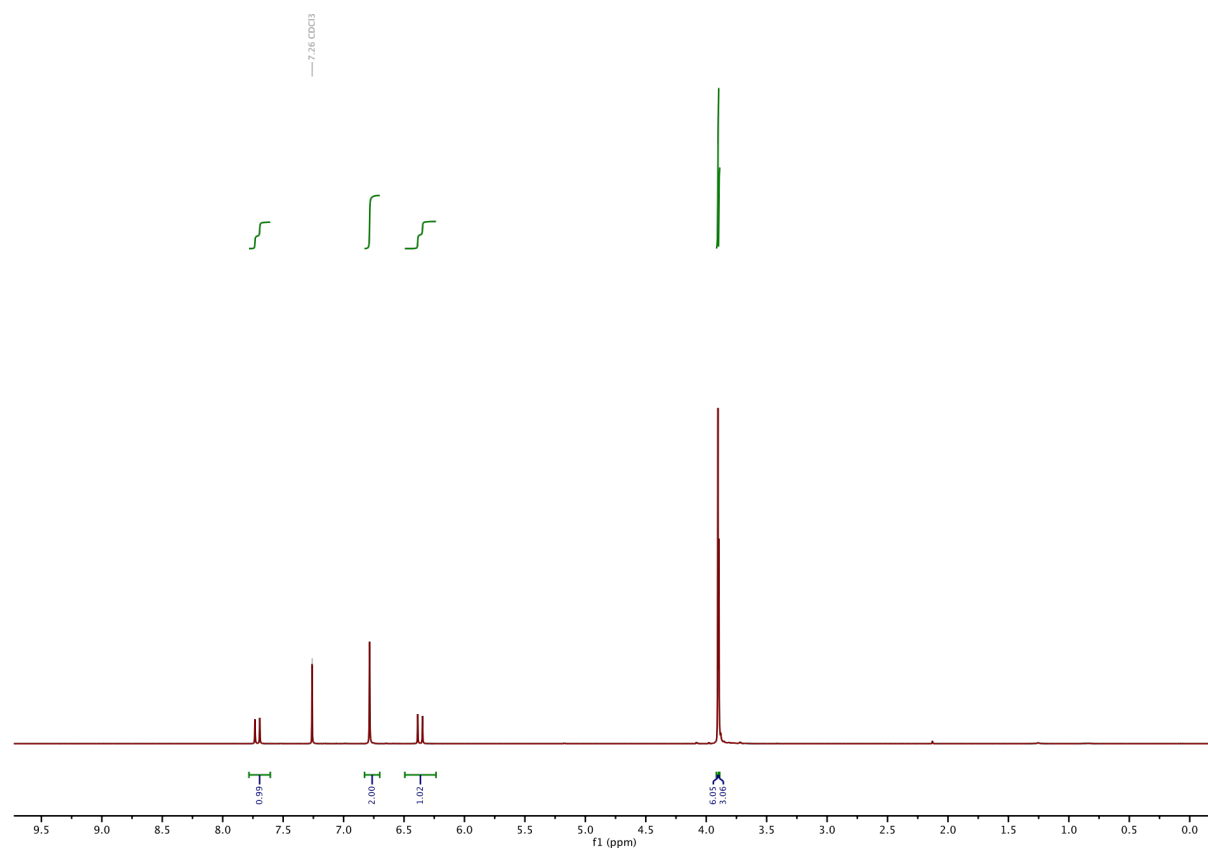

**<sup>13</sup>C-NMR of 4:**

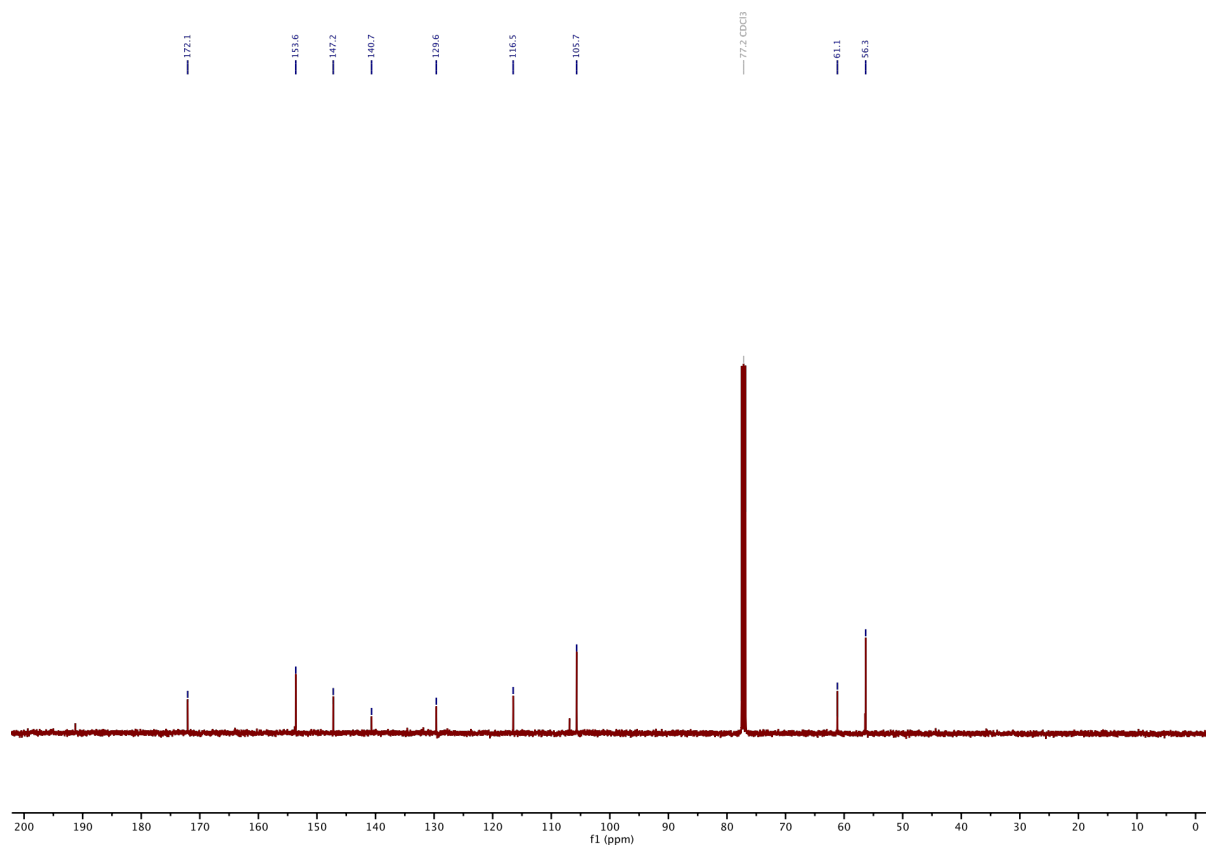

**<sup>1</sup>H-NMR of 5:**

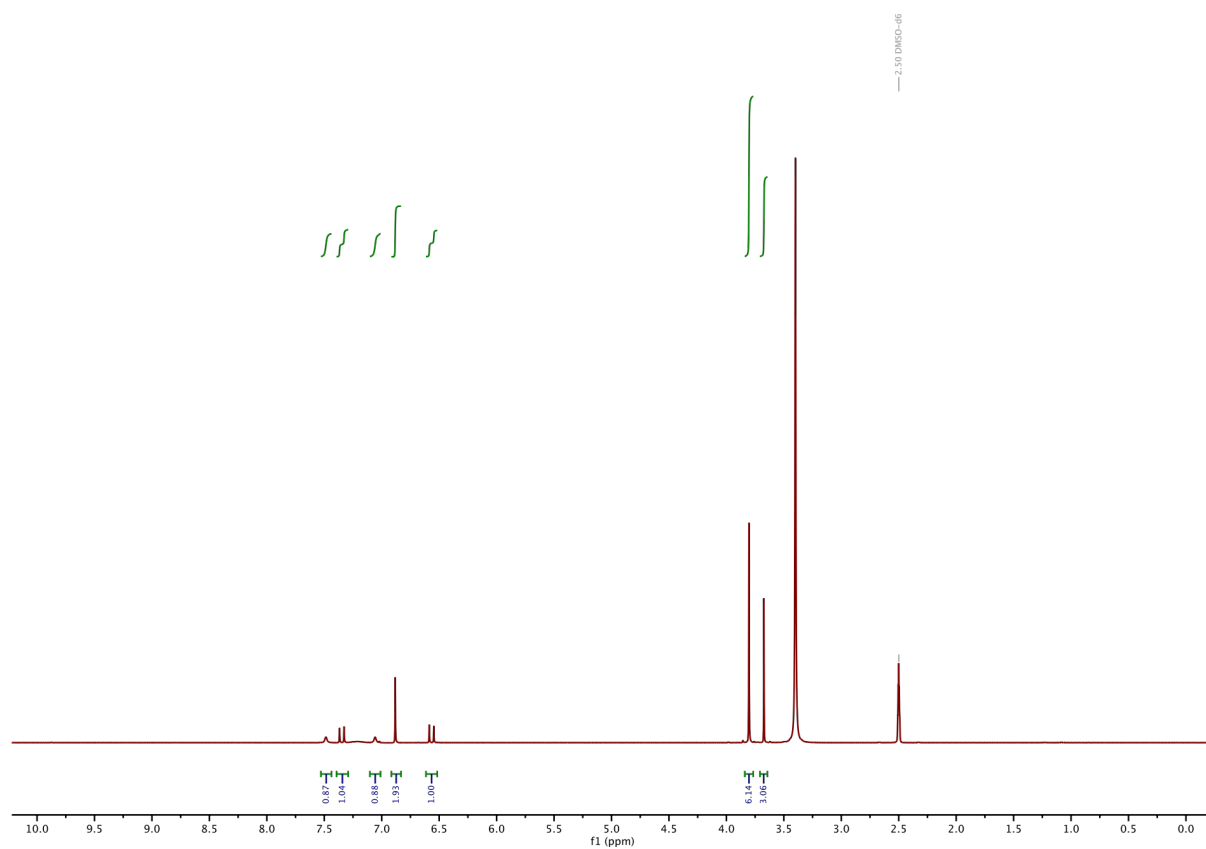

**<sup>13</sup>C-NMR of 5:**

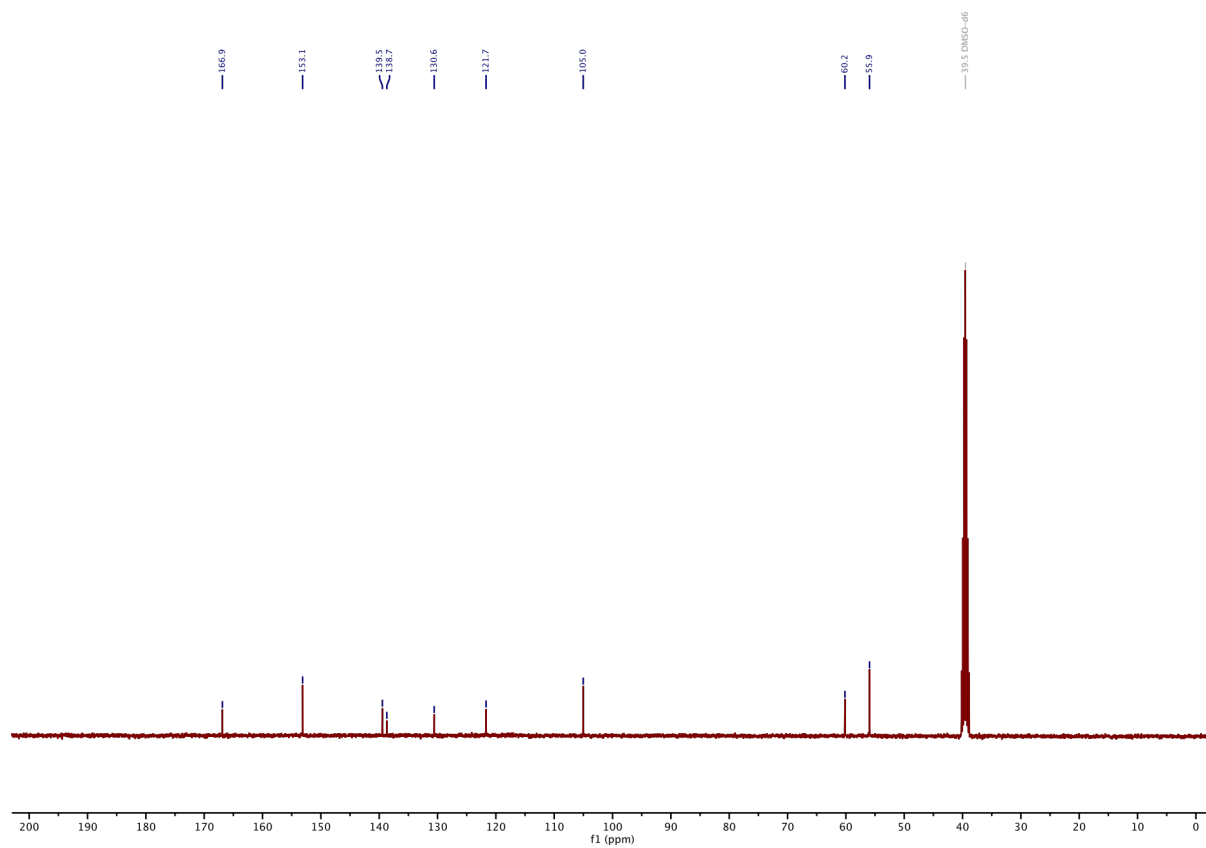

**<sup>1</sup>H-NMR of 6:**

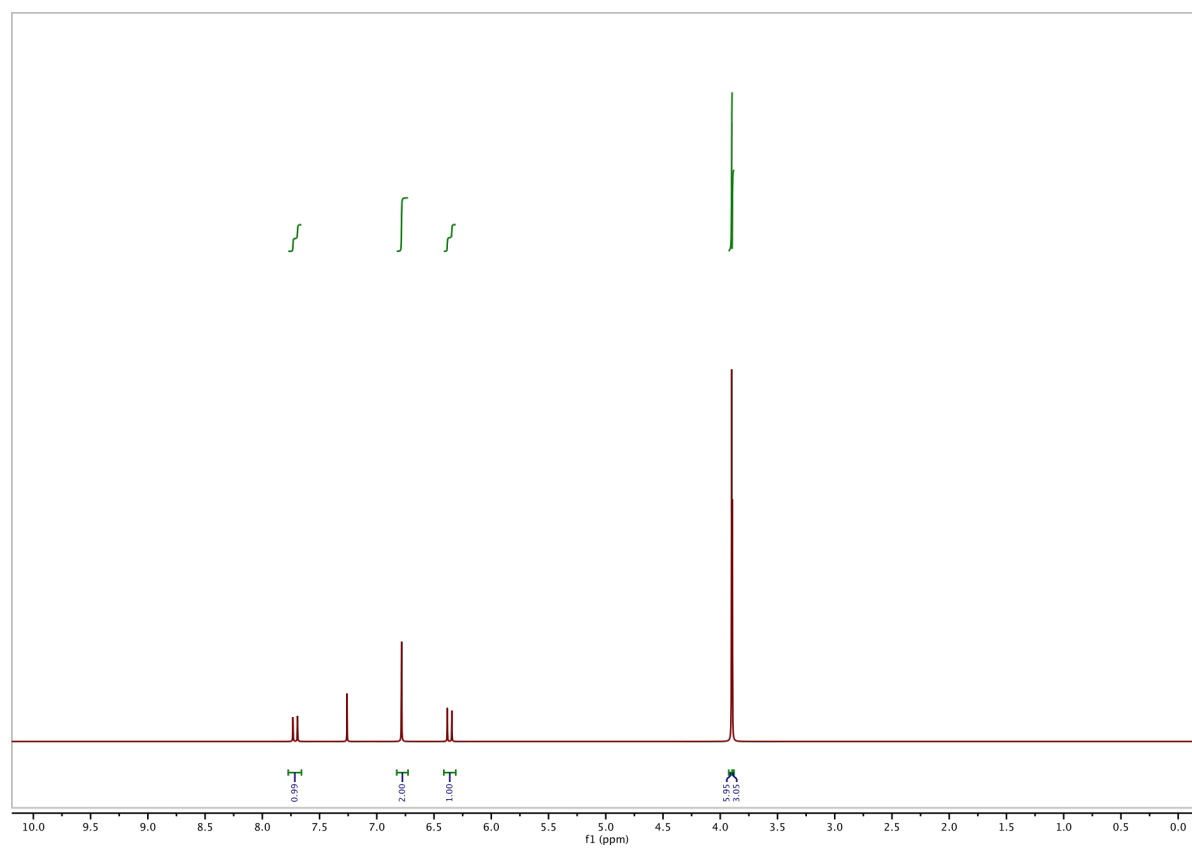



**<sup>13</sup>C-NMR of 6:**

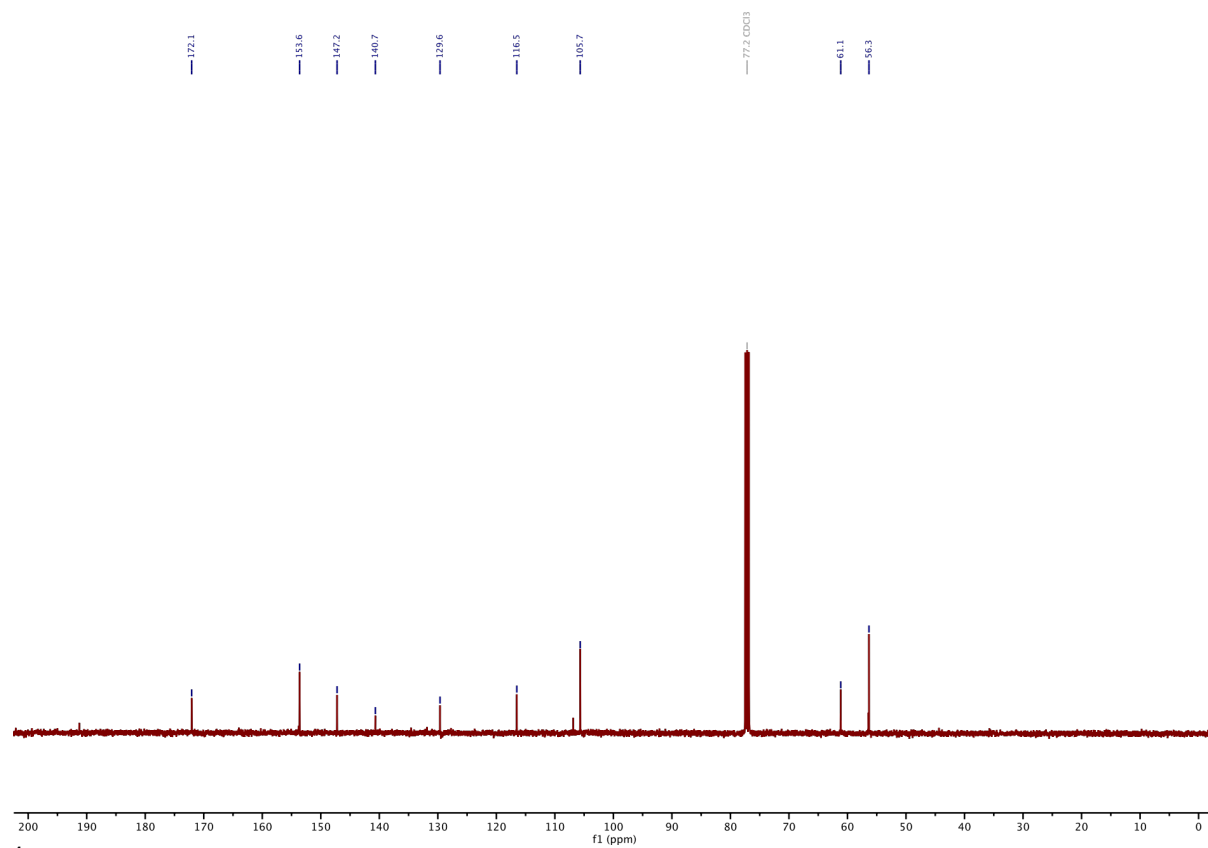

**<sup>1</sup>H-NMR of 7:**

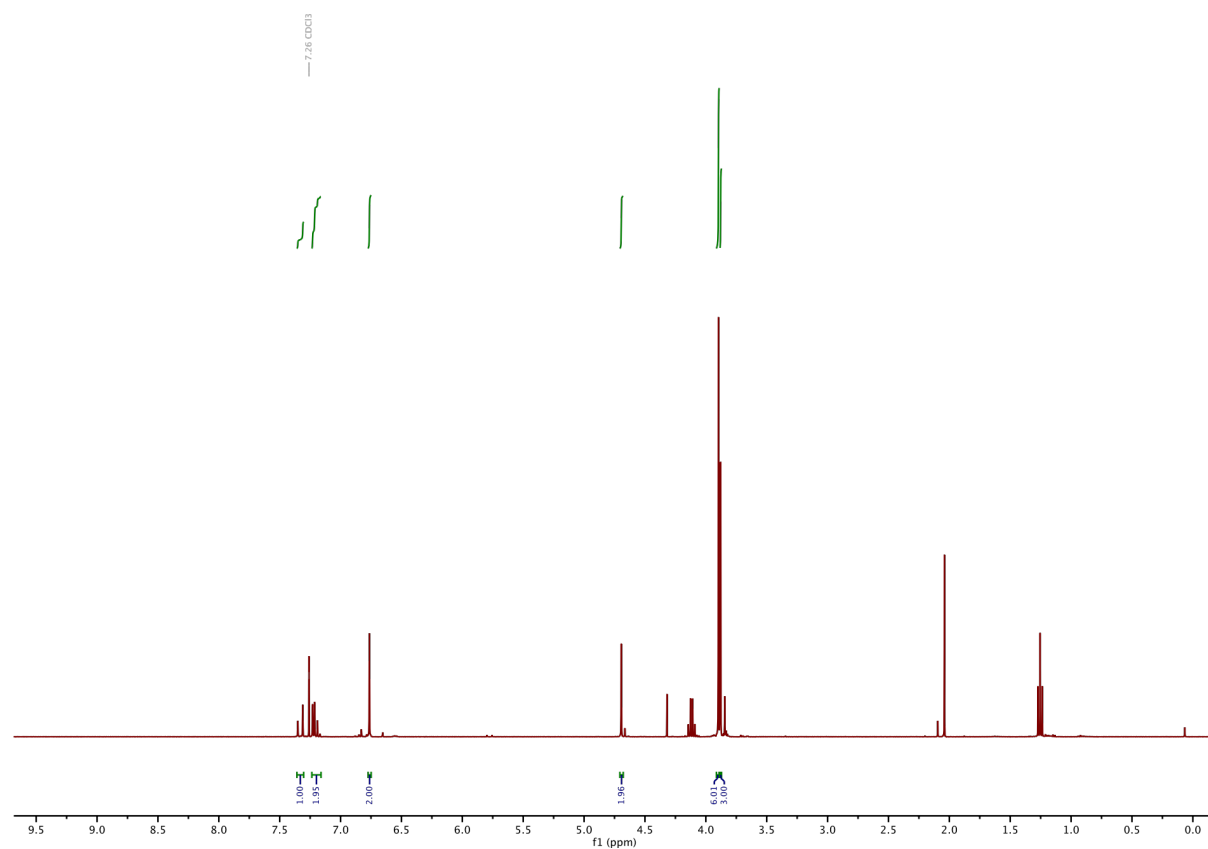

**<sup>13</sup>C-NMR of 7:**

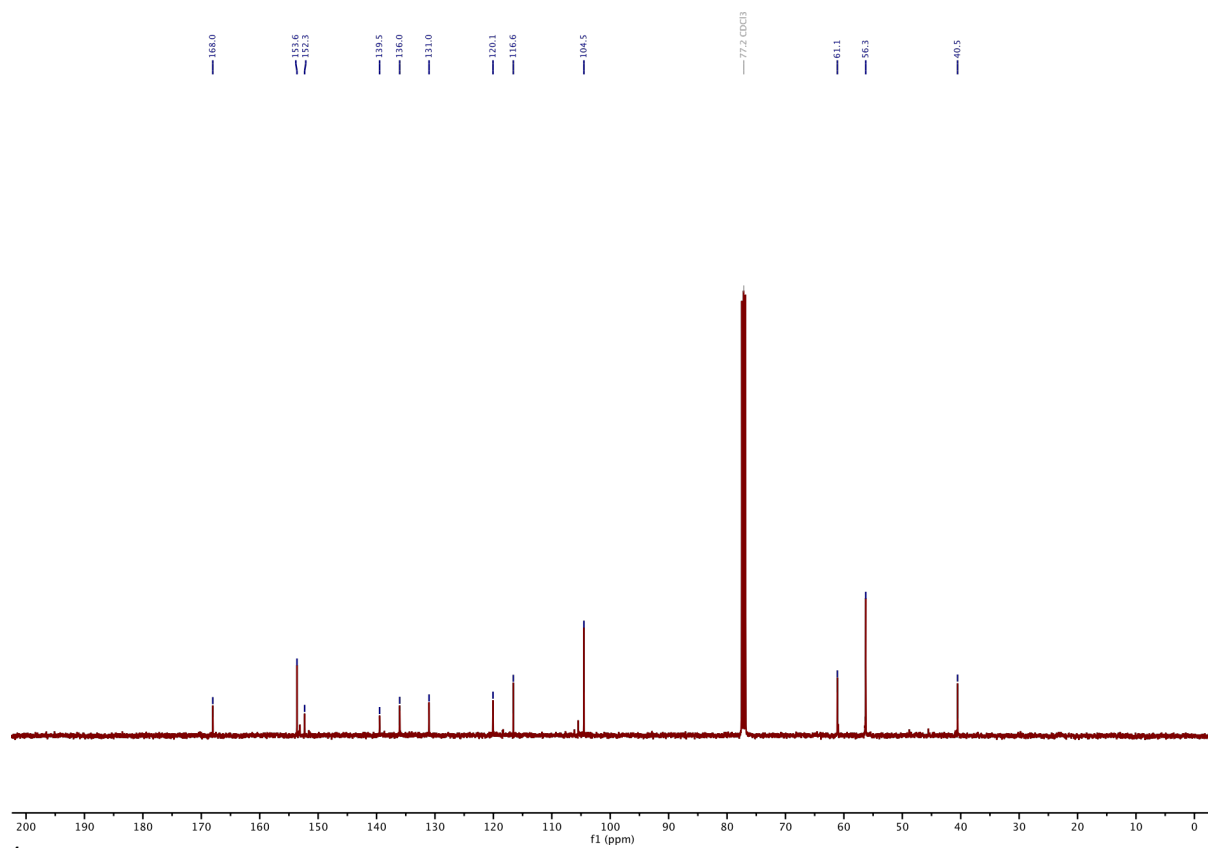

**<sup>1</sup>H-NMR of 8:**

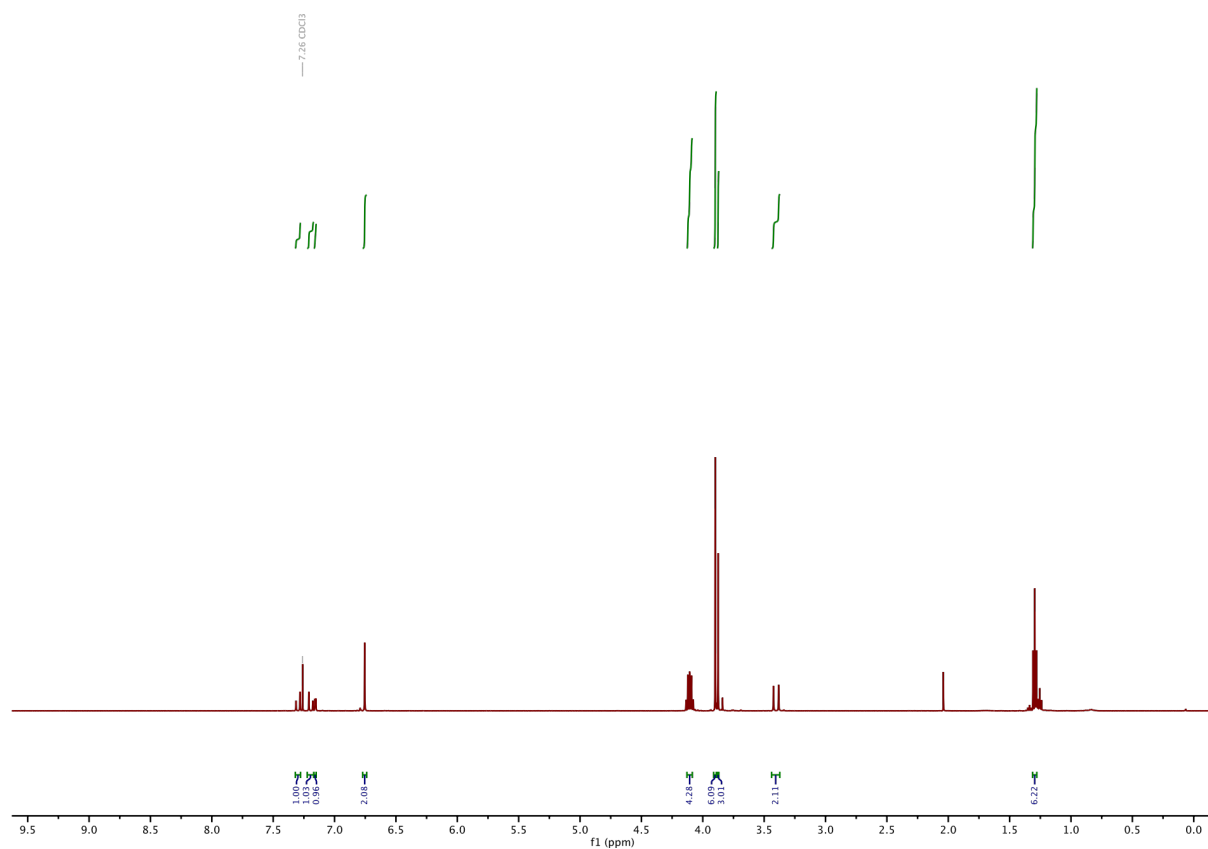

**<sup>13</sup>C-NMR of 8:**

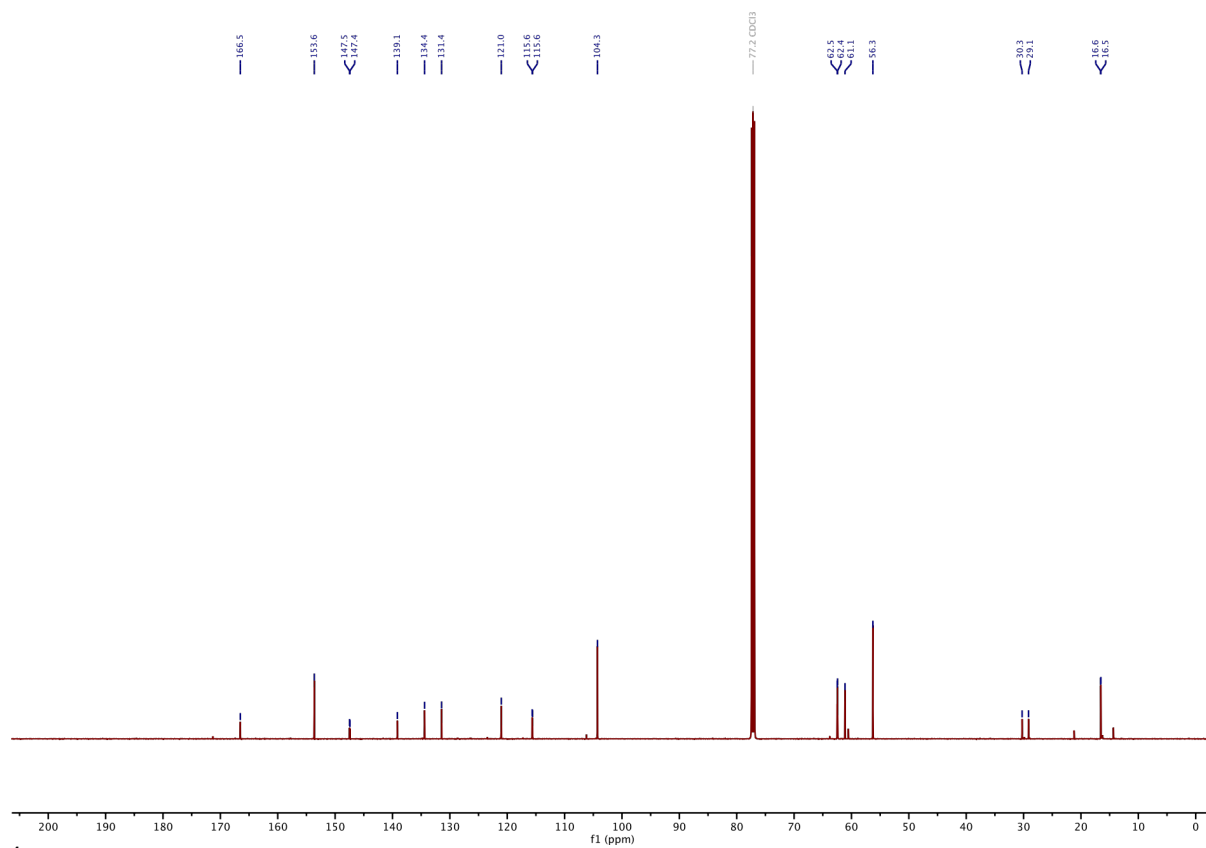

**<sup>1</sup>H-NMR of 11a:**

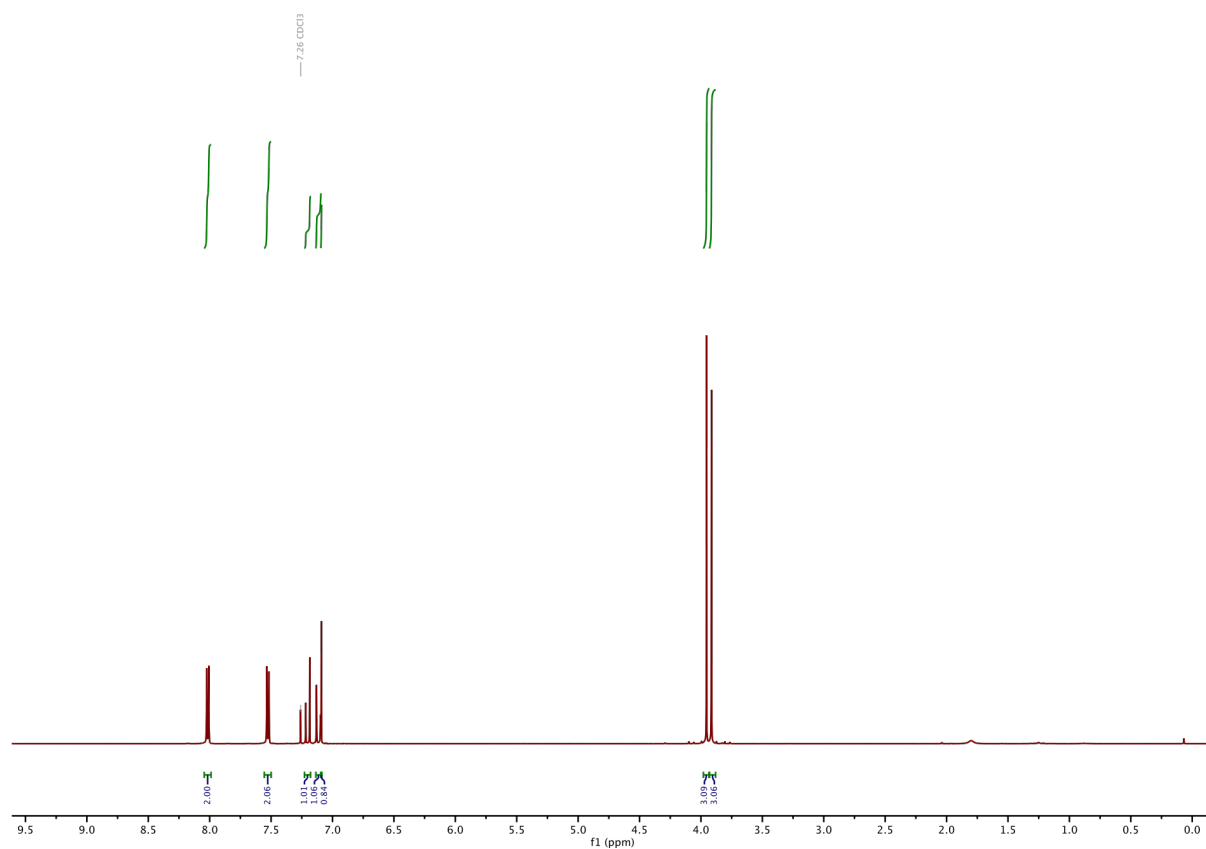

### **<sup>13</sup>C-NMR of 11a:**

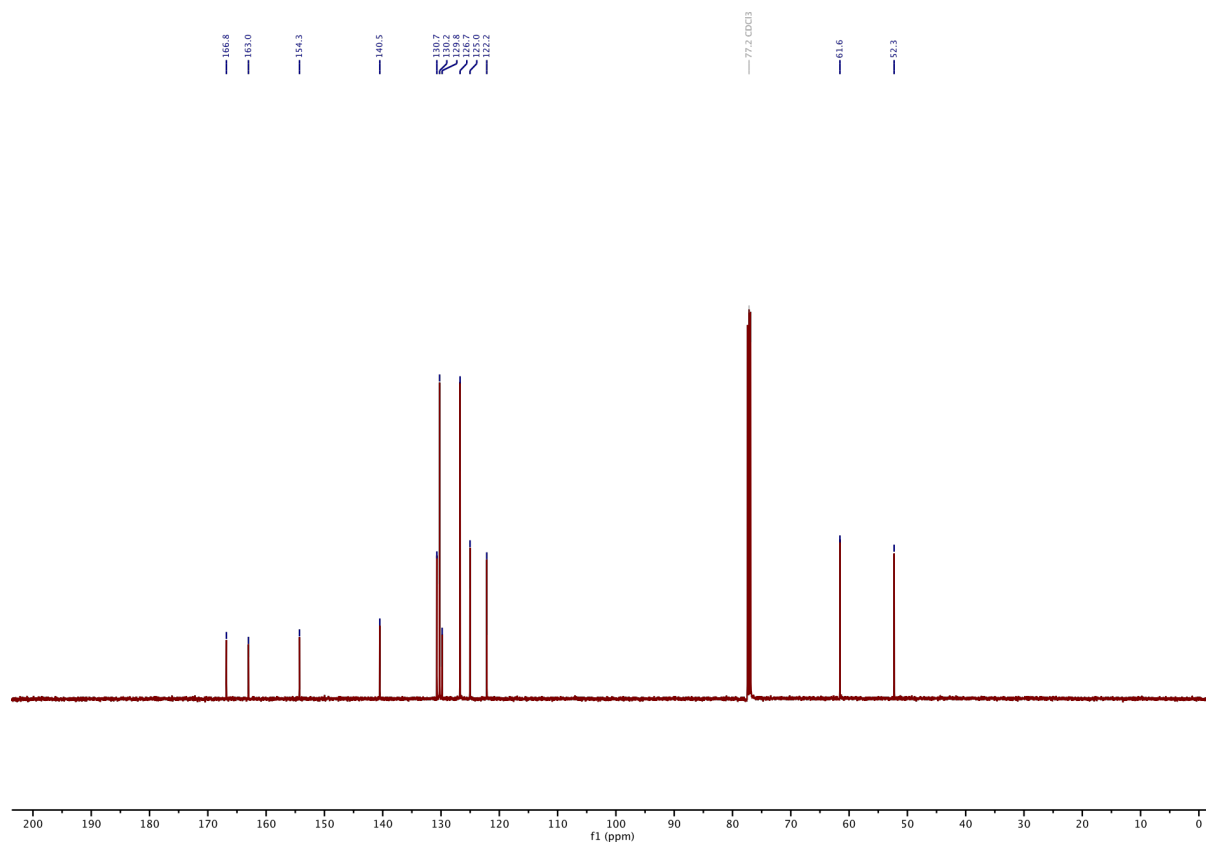

### **<sup>1</sup>H-NMR of S1:**

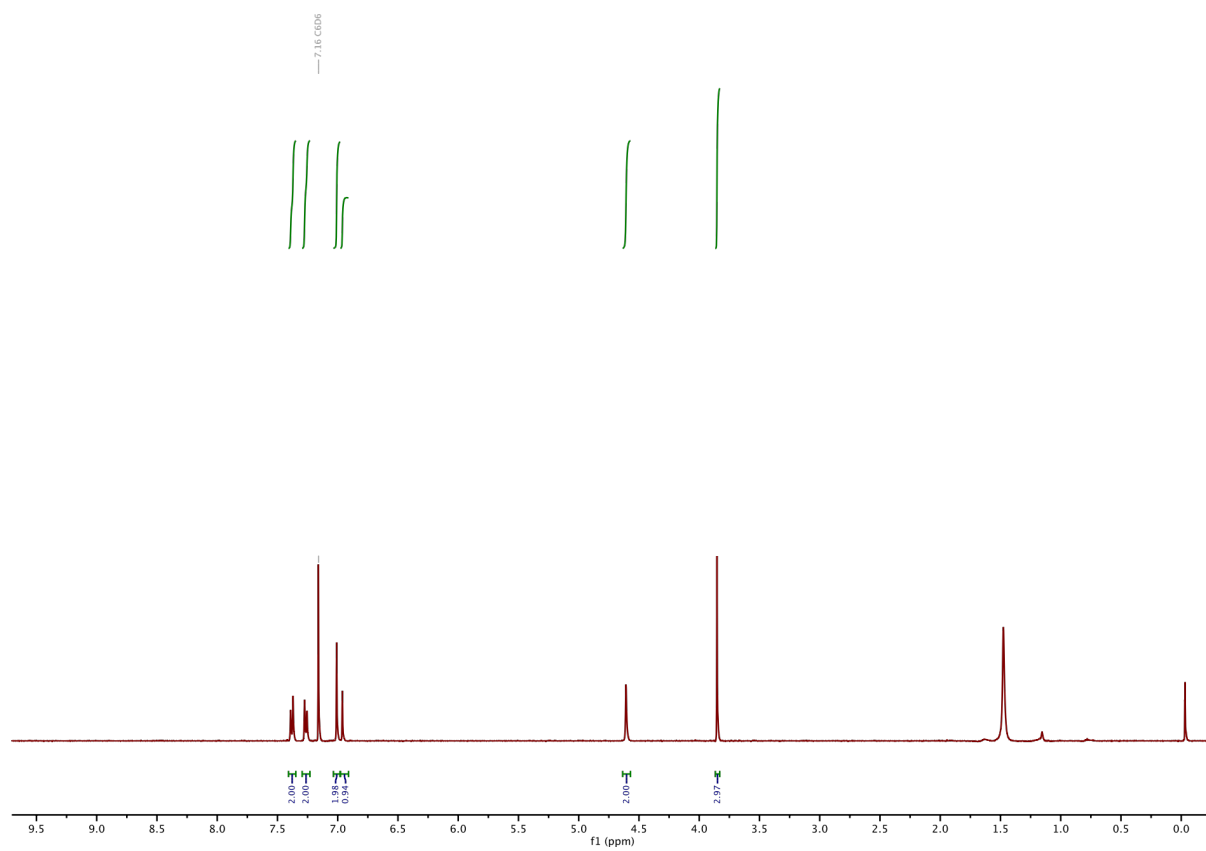

### <sup>13</sup>C-NMR of S1

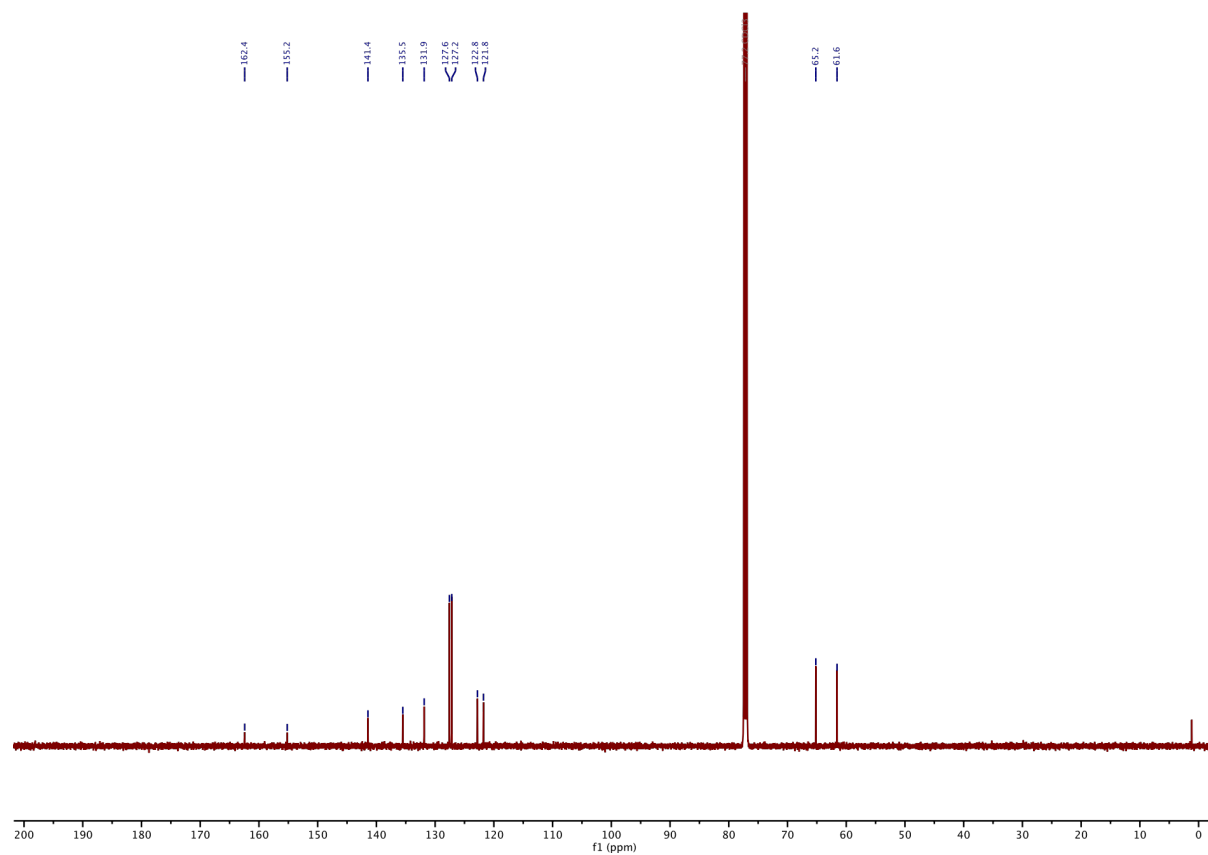

### <sup>1</sup>H-NMR of S2:

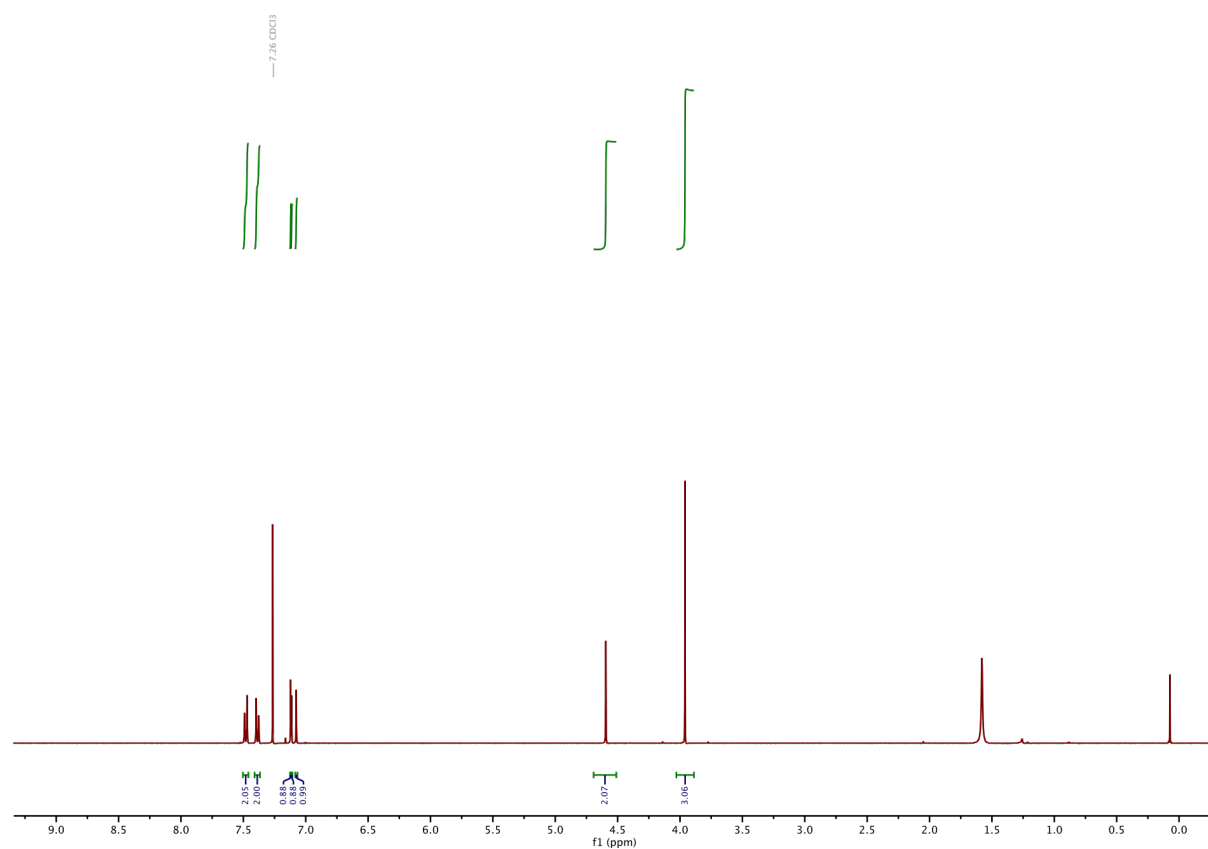

**<sup>13</sup>C-NMR of S2:**

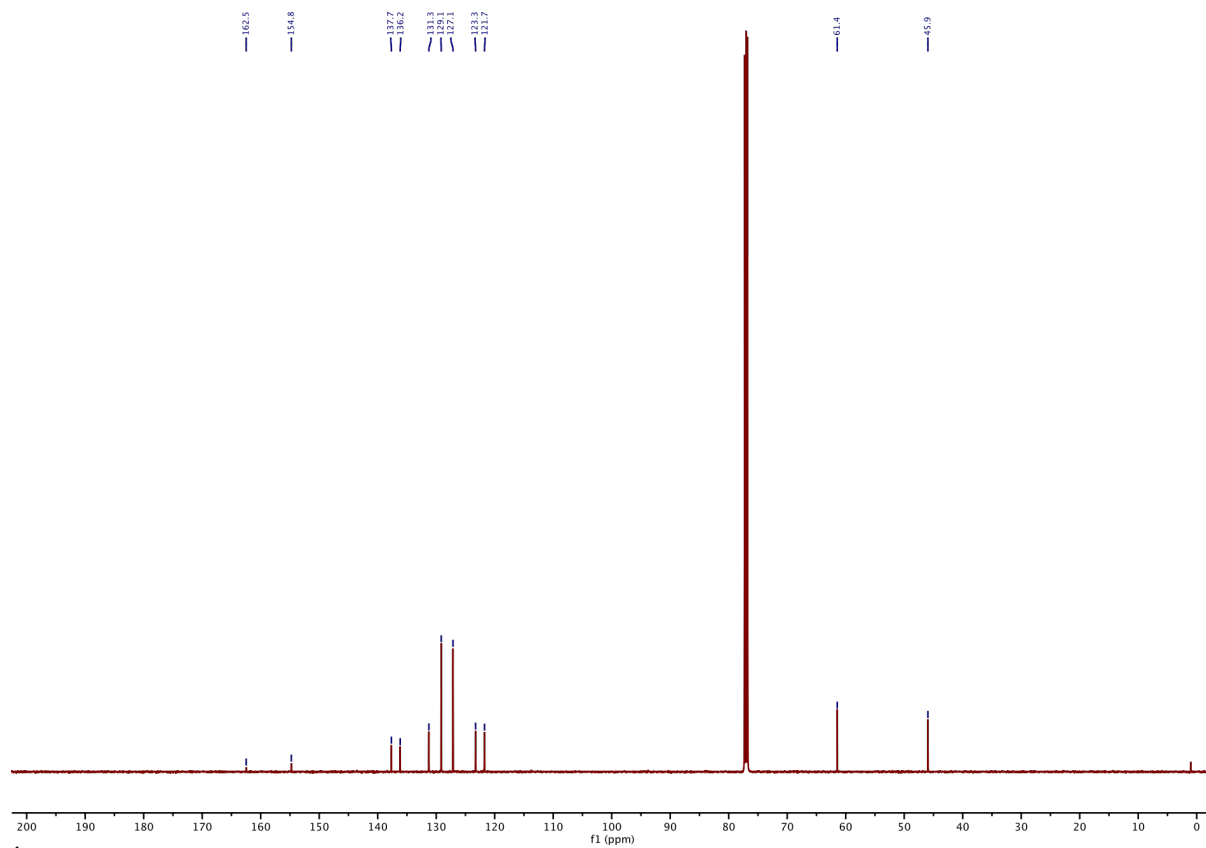

**<sup>1</sup>H-NMR of 12a:**

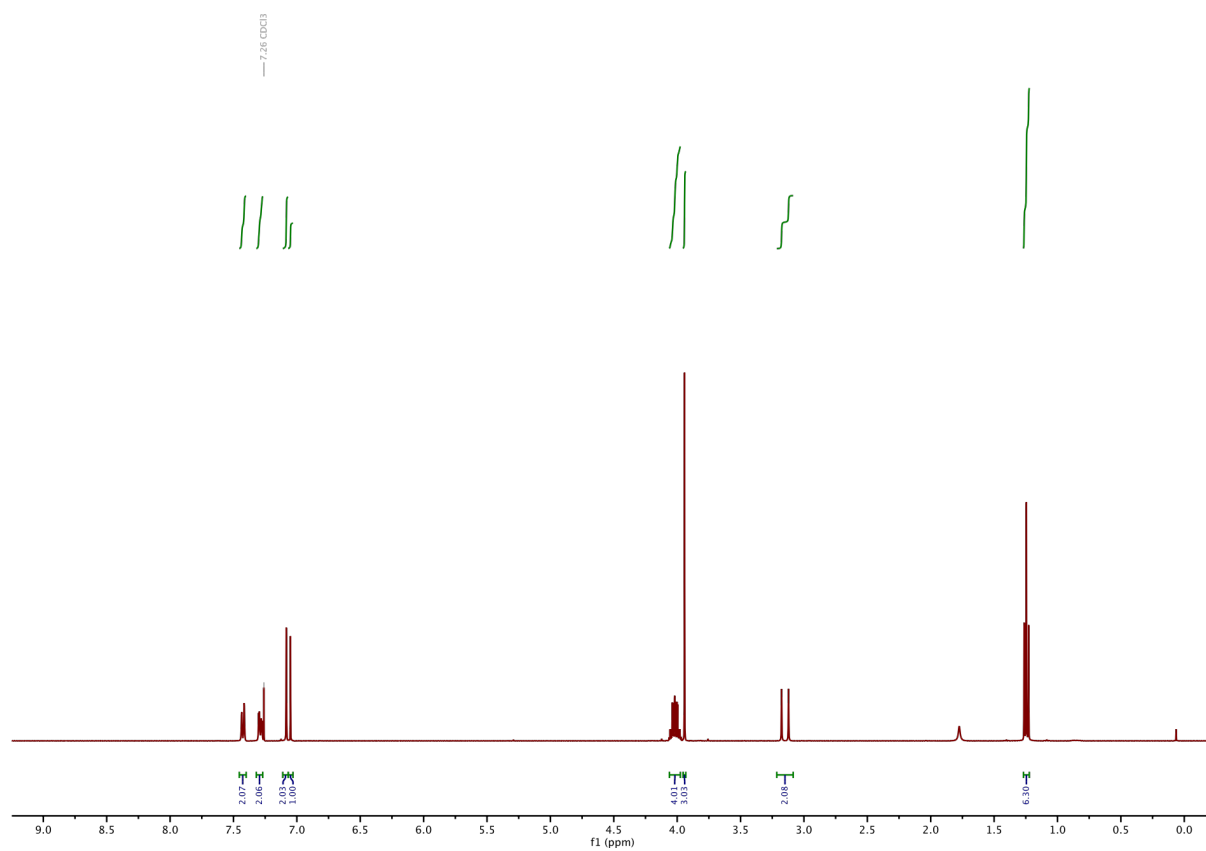

**<sup>13</sup>C-NMR of 12a:**

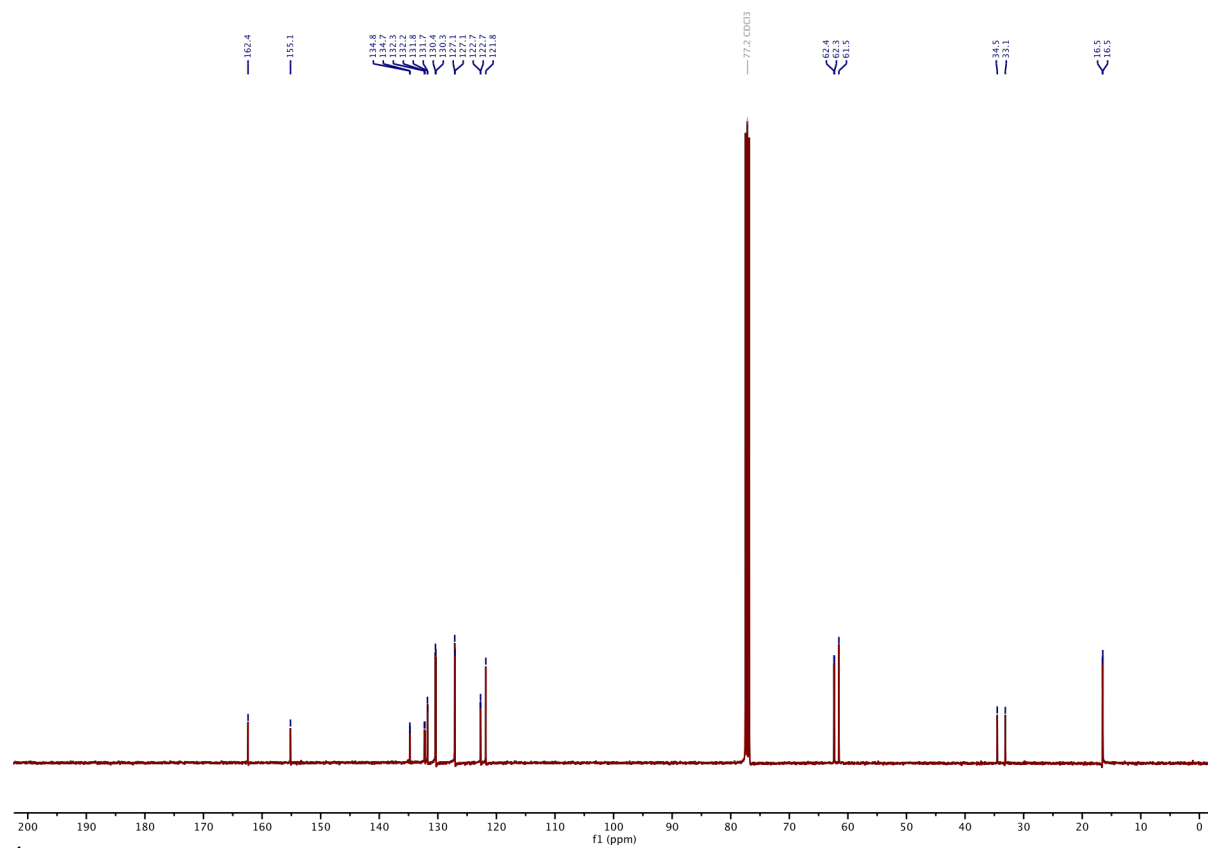

**<sup>1</sup>H-NMR of 11b:**

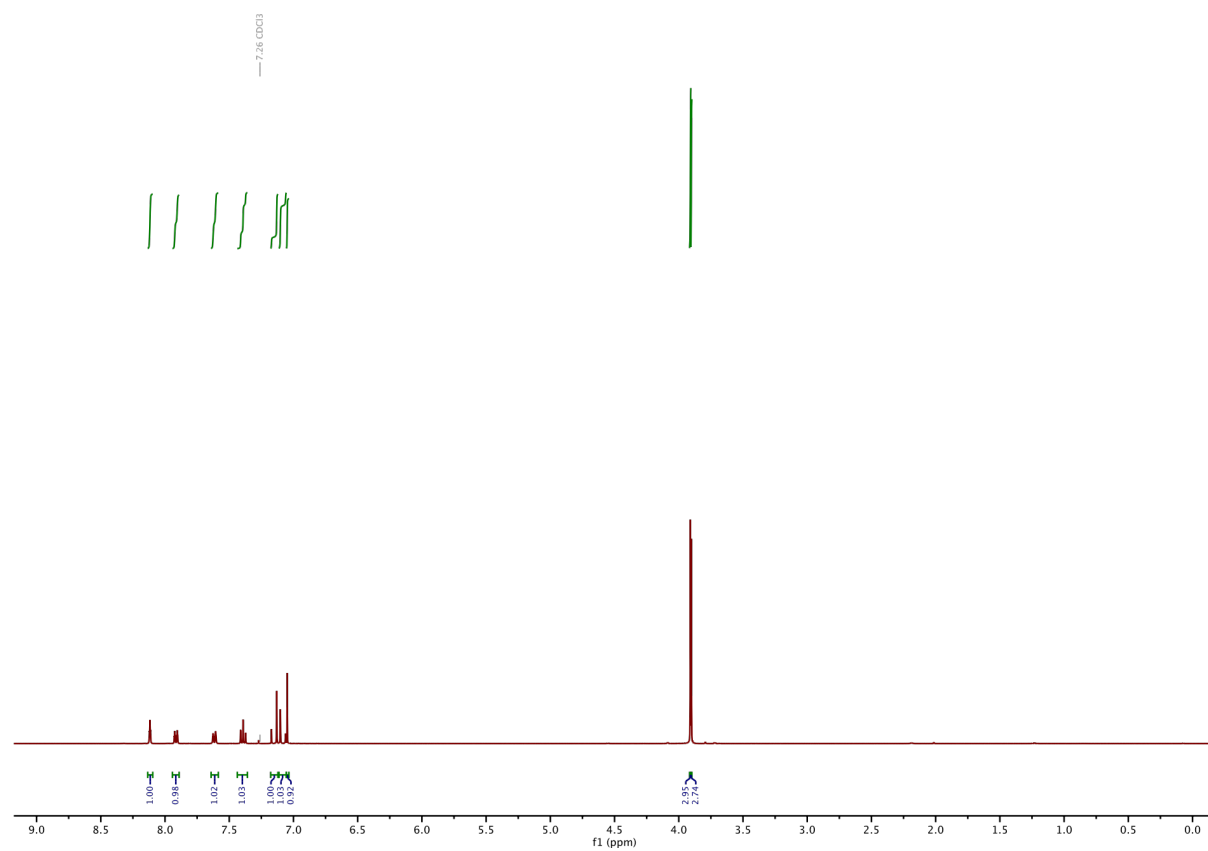

**<sup>13</sup>C-NMR of 11b:**

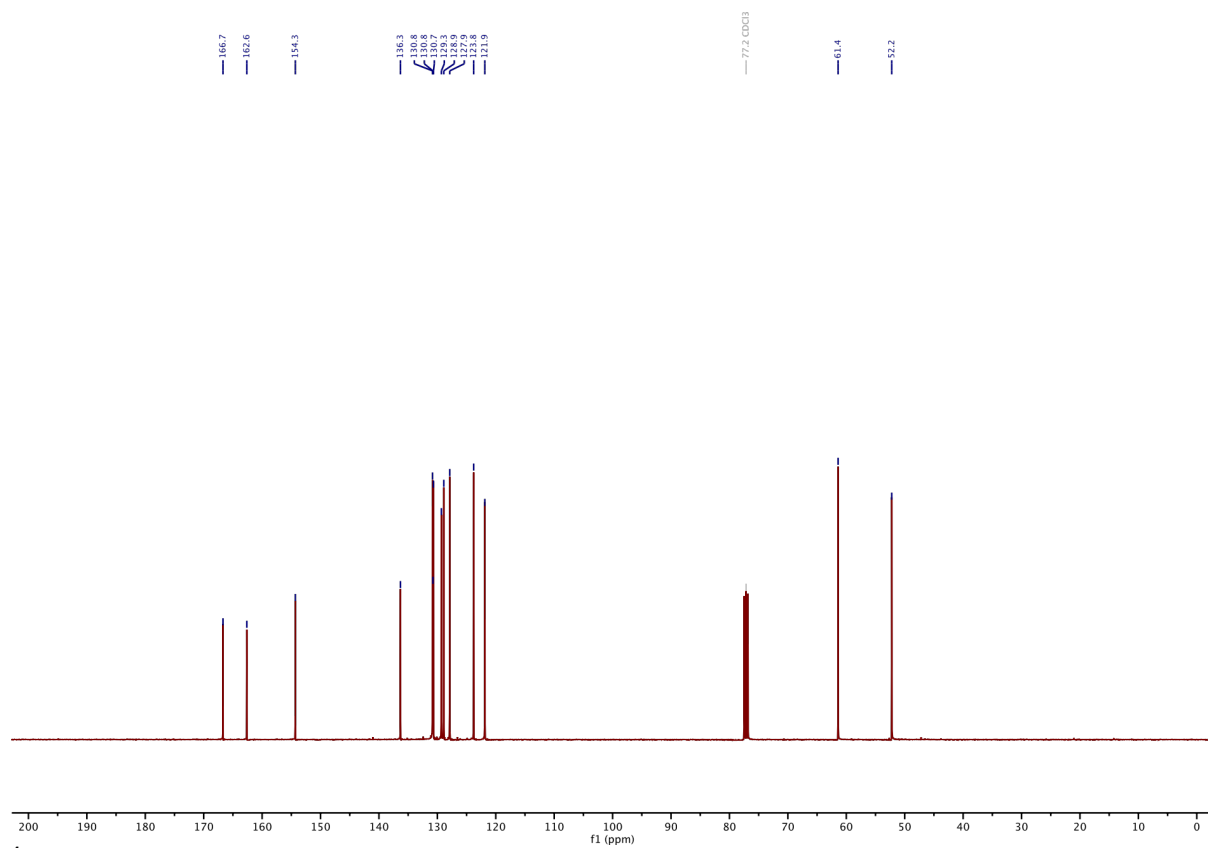

**<sup>1</sup>H-NMR of S3:**

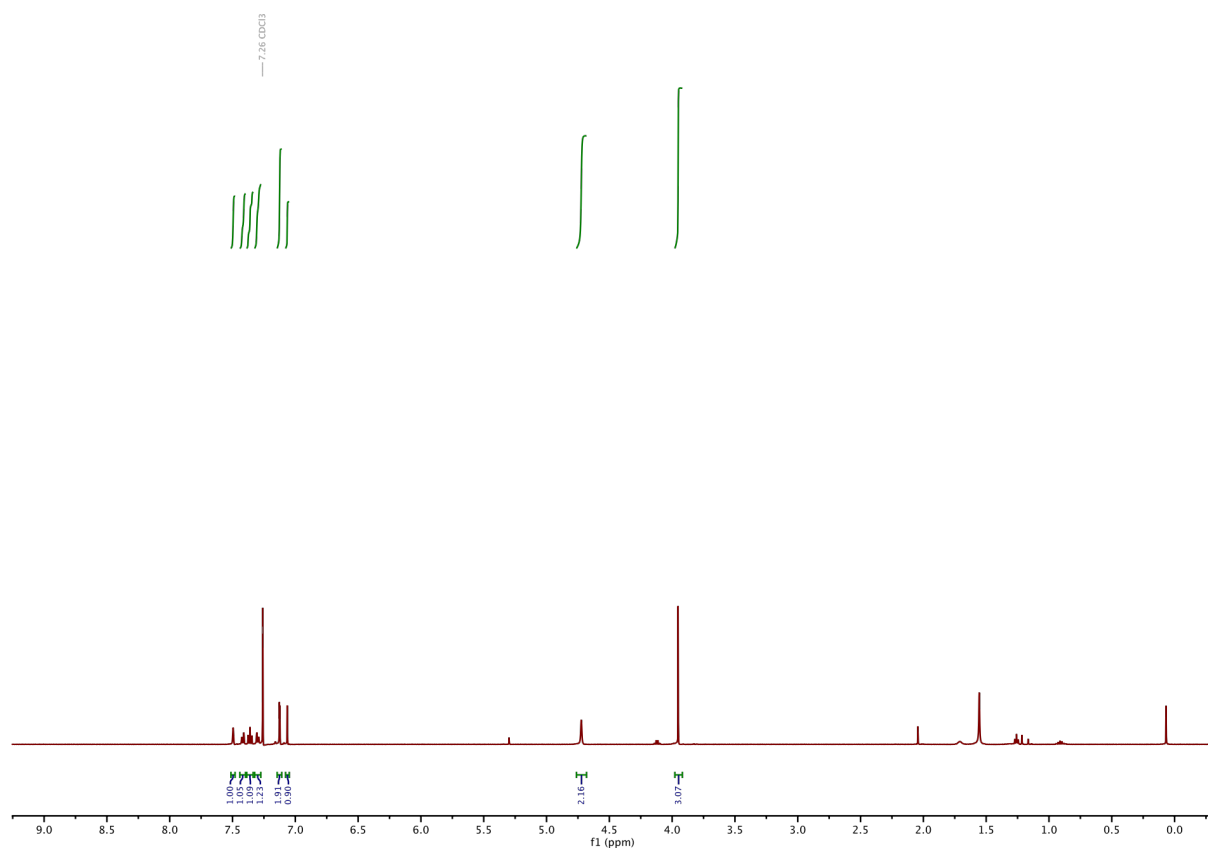



**<sup>13</sup>C-NMR of S3:**

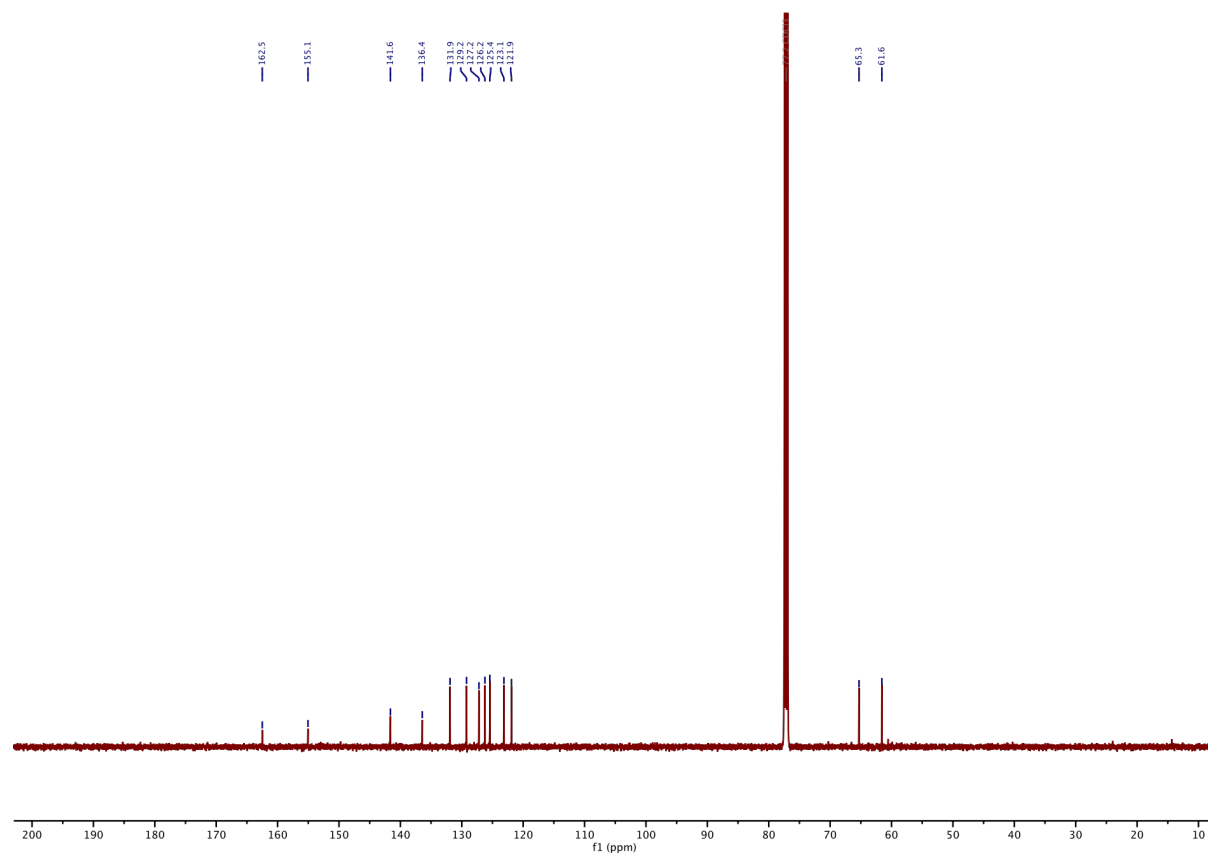

**<sup>1</sup>H-NMR of S4:**

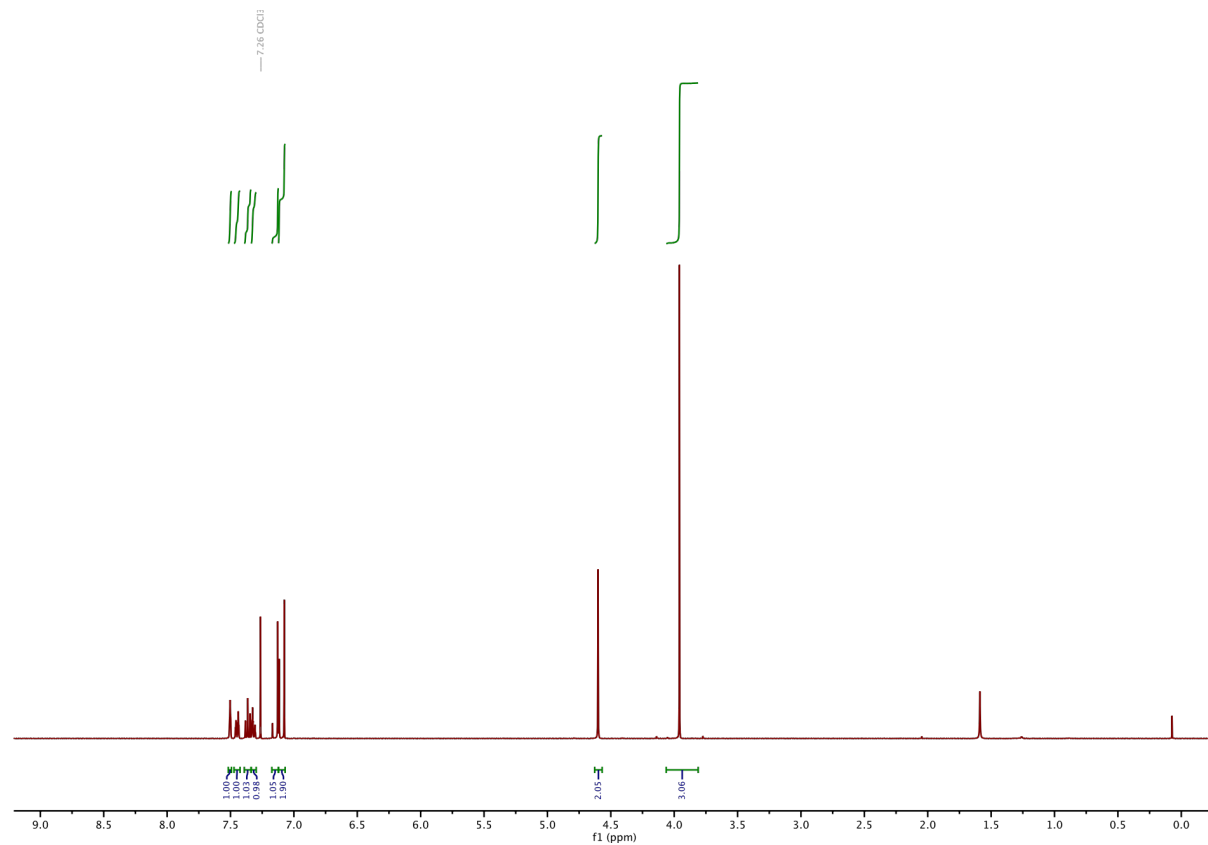

**<sup>13</sup>C-NMR of S4:**

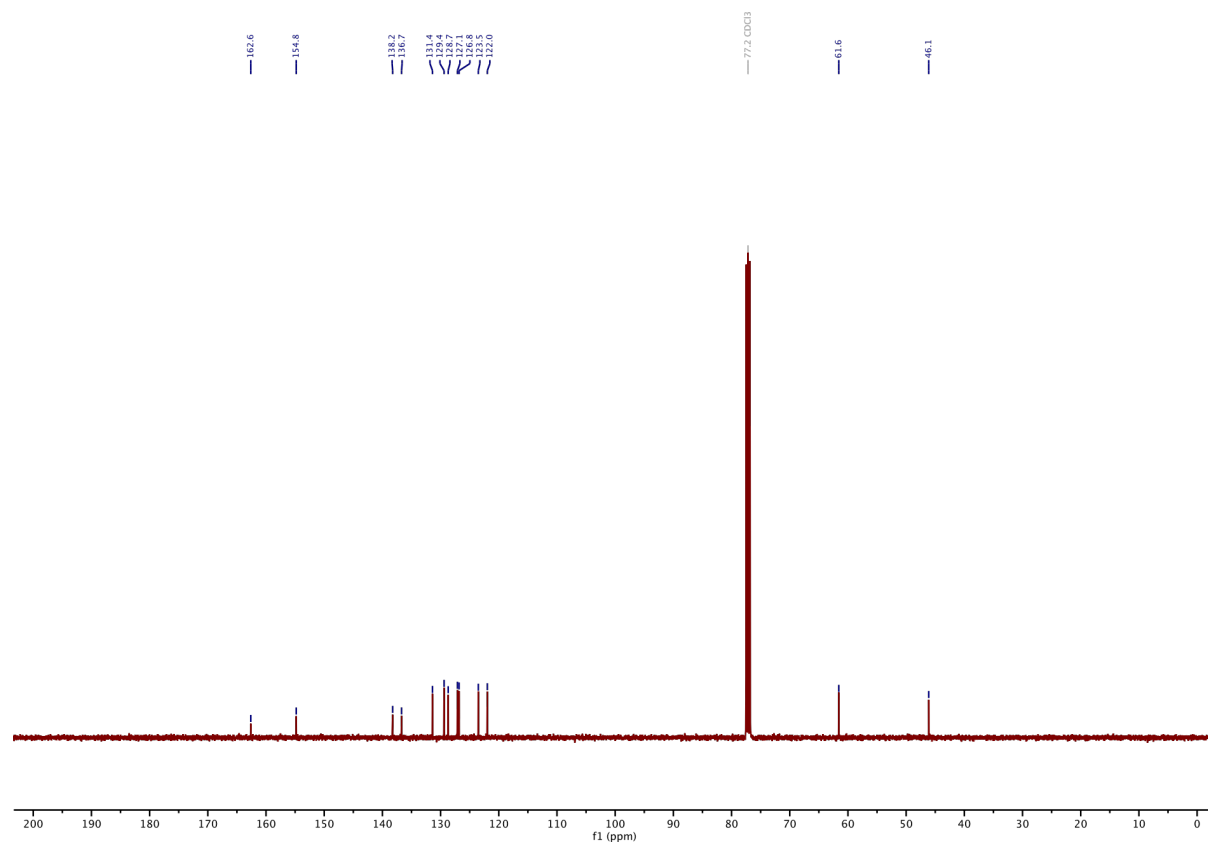

**<sup>1</sup>H-NMR of 12b:**

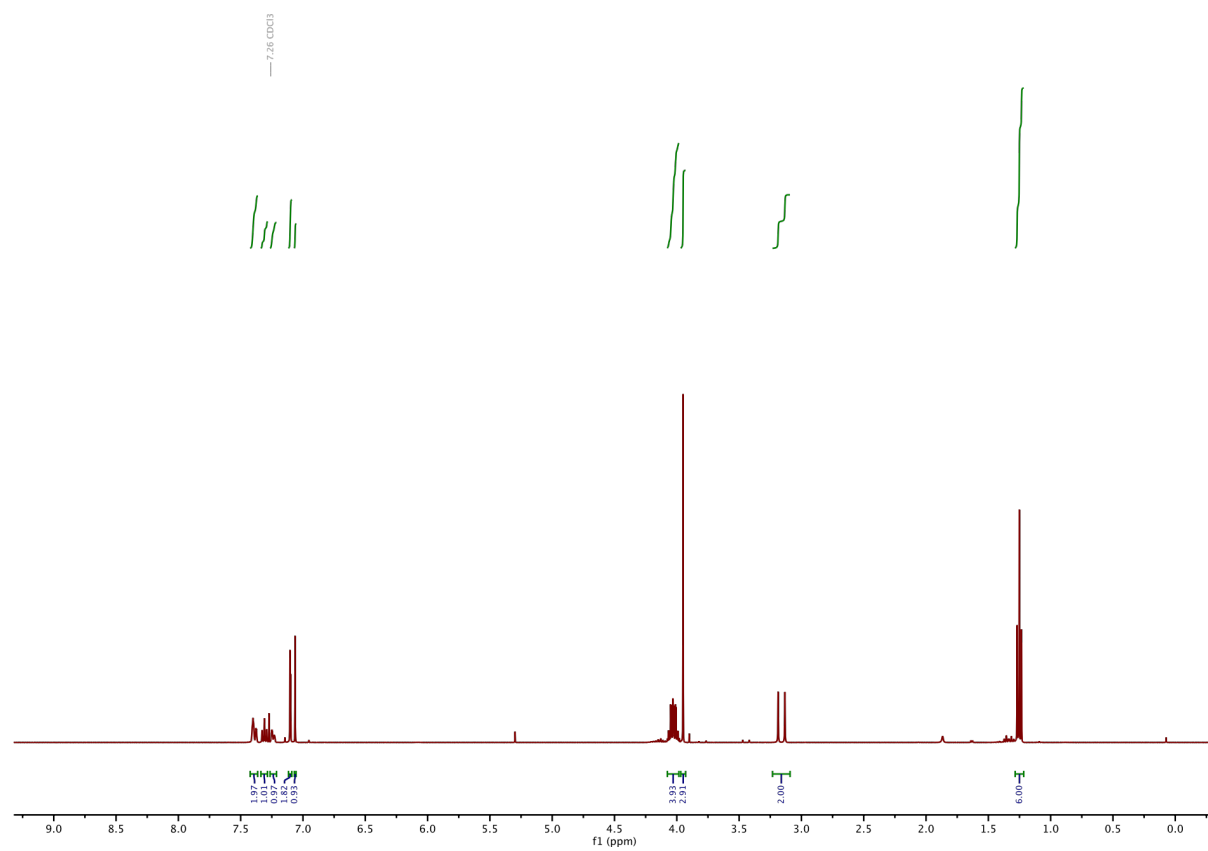

**<sup>13</sup>C-NMR of 12b:**

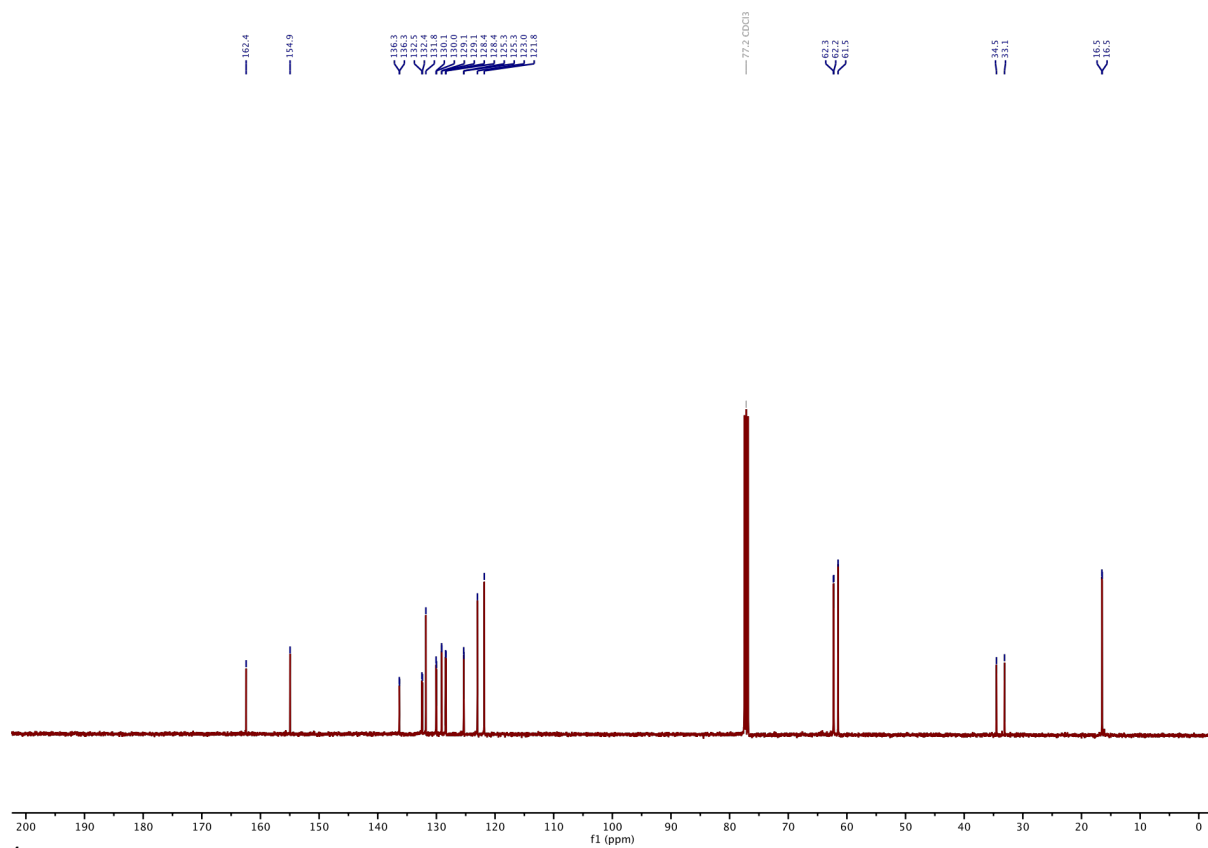

**<sup>1</sup>H-NMR of SBTax:**

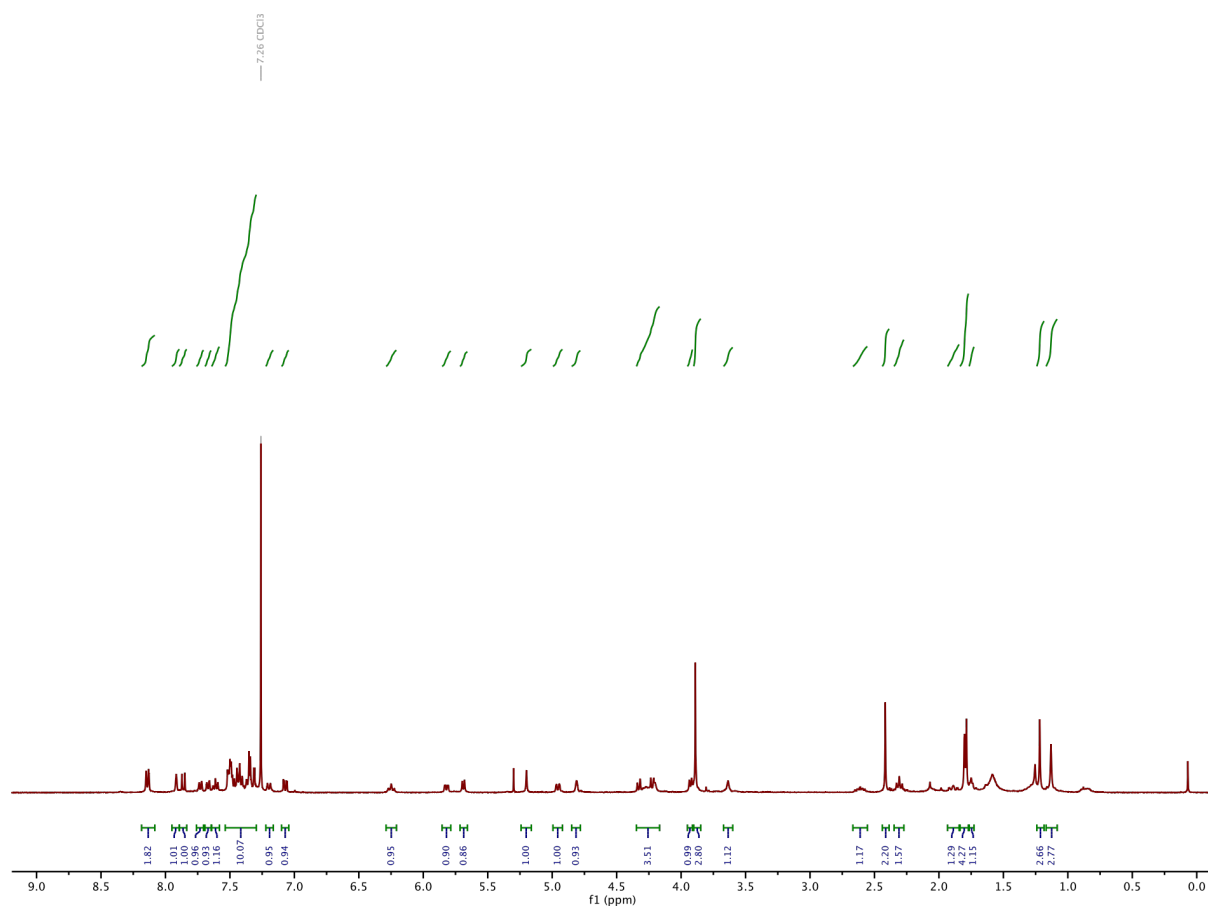

**<sup>13</sup>C-NMR of SBTax:**

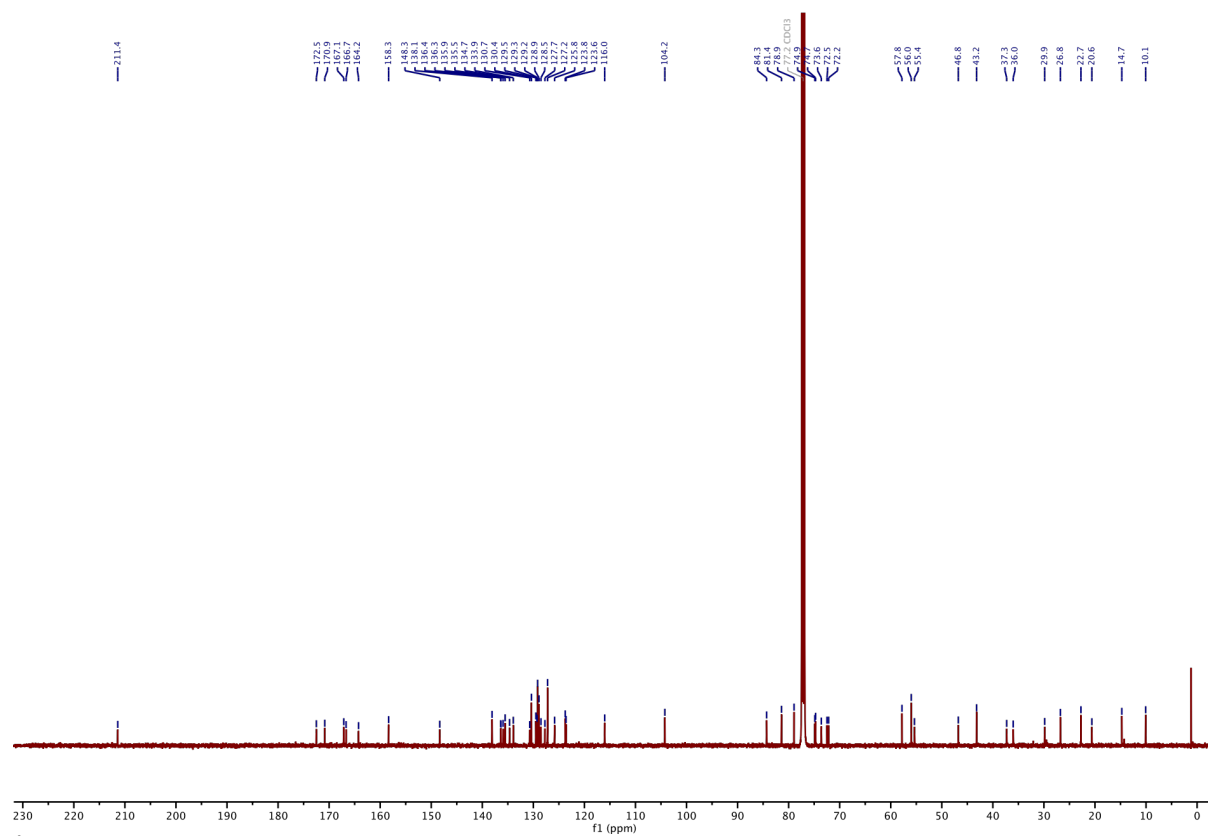

**<sup>1</sup>H-NMR of SBT photoswitch:**

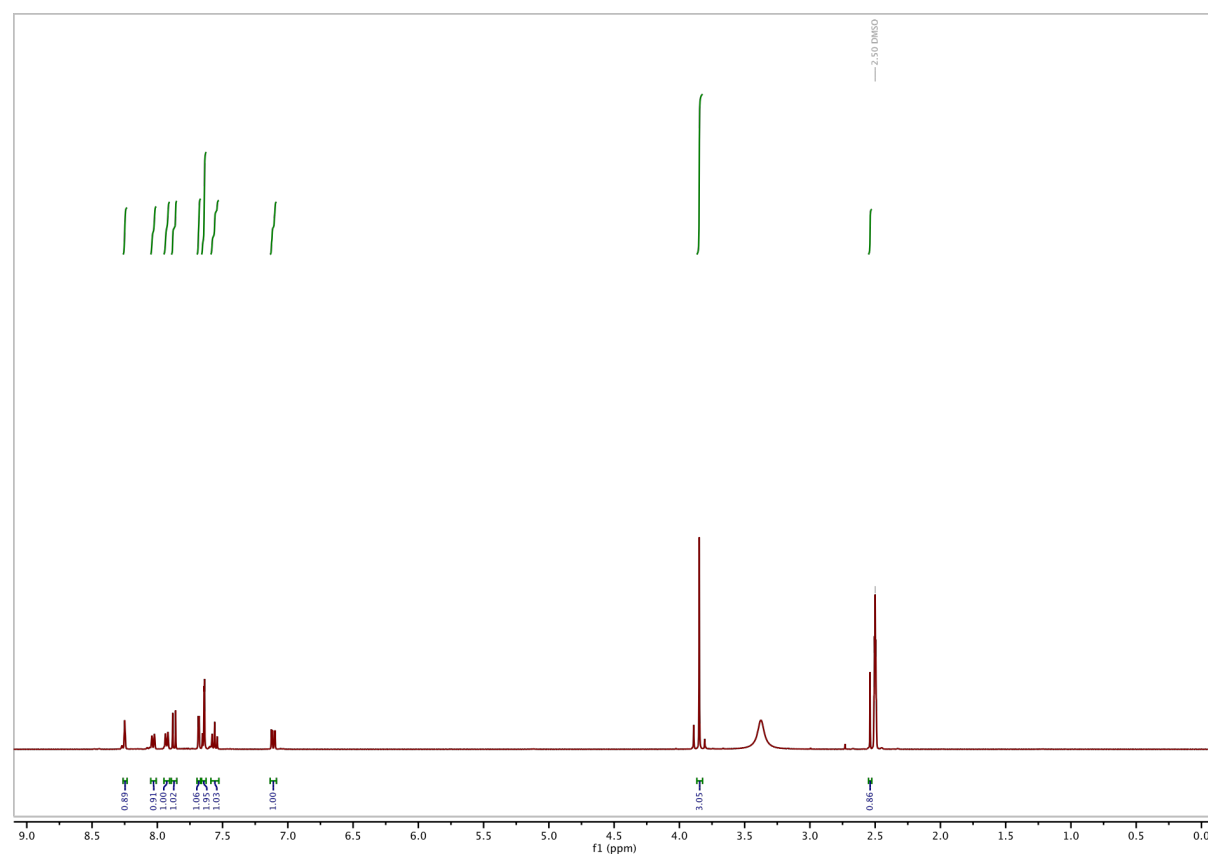

**<sup>13</sup>C-NMR of SBT photoswitch:**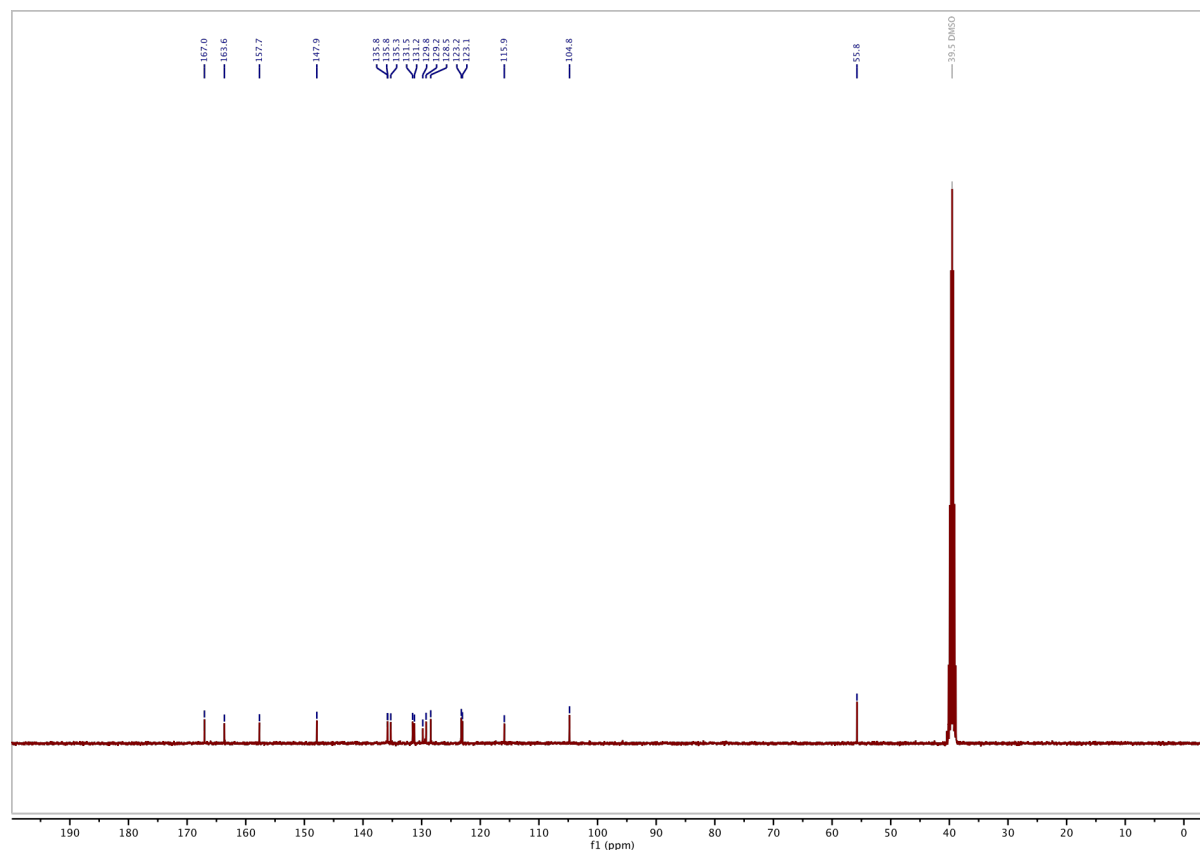**Supporting Information Bibliography**

- (1) Fulmer, G. R.; Miller, A. J.; Sherden, N. H.; Gottlieb, H. E.; Nudelman, A.; Stoltz, B. M.; Bercaw, J. E.; Goldberg, K. I. NMR Chemical Shifts of Trace Impurities: Common Laboratory Solvents, Organics, and Gases in Deuterated Solvents Relevant to the Organometallic Chemist. *Organometallics* **2010**, *29* (9), 2176–2179.
- (2) Nicolaou, K. C.; Rhoades, D.; Wang, Y.; Bai, R.; Hamel, E.; Aujay, M.; Sandoval, J.; Gavriluyk, J. 12,13-Aziridinyl Epothilones. Stereoselective Synthesis of Trisubstituted Olefinic Bonds from Methyl Ketones and Heteroaromatic Phosphonates and Design, Synthesis, and Biological Evaluation of Potent Antitumor Agents. *J. Am. Chem. Soc.* **2017**, *139* (21), 7318–7334. <https://doi.org/10.1021/jacs.7b02655>.
- (3) Nicolaou, K. C.; Shelke, Y. G.; Dherange, B. D.; Kempema, A.; Lin, B.; Gu, C.; Sandoval, J.; Hammond, M.; Aujay, M.; Gavriluyk, J. Design, Synthesis, and Biological Investigation of Epothilone B Analogues Featuring Lactone, Lactam, and Carbocyclic Macrocycles, Epoxide, Aziridine, and 1,1-Difluorocyclopropane and Other Fluorine Residues. *J Org Chem* **2020**, *53*.
- (4) Gao, L.; Meiring, J. C. M.; Kraus, Y.; Wranik, M.; Weinert, T.; Pritzl, S. D.; Bingham, R.; Ntoliou, E.; Jansen, K. I.; Olieric, N.; Standfuss, J.; Kapitein, L. C.; Lohmüller, T.; Ahlfeld, J.; Akhmanova, A.; Steinmetz, M. O.; Thorn-Seshold, O. A Robust, GFP-Orthogonal Photoswitchable Inhibitor Scaffold Extends Optical Control over the Microtubule Cytoskeleton. *Cell Chem. Biol.* **2021**, *28* (2), 228–241.e6. <https://doi.org/10.1016/j.chembiol.2020.11.007>.
- (5) Jorgensen, W. L.; Maxwell, D. S.; Tirado-Rives, J. Development and Testing of the OPLS All-Atom Force Field on Conformational Energetics and Properties of Organic Liquids. *J. Am. Chem. Soc.* **1996**, *118* (45), 11225–11236. <https://doi.org/10.1021/ja9621760>.
- (6) Harder, E.; Damm, W.; Maple, J.; Wu, C.; Reboul, M.; Xiang, J. Y.; Wang, L.; Lupyan, D.; Dahlgren, M. K.; Knight, J. L.; Kaus, J. W.; Cerutti, D. S.; Krilov, G.; Jorgensen, W. L.; Abel, R.; Friesner, R. A. OPLS3: A Force Field Providing Broad Coverage of Drug-like Small Molecules and Proteins. *J. Chem. Theory Comput.* **2016**, *12* (1), 281–296. <https://doi.org/10.1021/acs.jctc.5b00864>.

- (7) Storer, J. W.; Giesen, D. J.; Cramer, C. J.; Truhlar, D. G. Class IV Charge Models: A New Semiempirical Approach in Quantum Chemistry. *J. Comput. Aided Mol. Des.* **1995**, *9* (1), 87–110. <https://doi.org/10.1007/BF00117280>.
- (8) Shivakumar, D.; Harder, E.; Damm, W.; Friesner, R. A.; Sherman, W. Improving the Prediction of Absolute Solvation Free Energies Using the Next Generation OPLS Force Field. *J. Chem. Theory Comput.* **2012**, *8* (8), 2553–2558. <https://doi.org/10.1021/ct300203w>.
- (9) Gao, L.; Meiring, J. C. M.; Varady, A.; Ruider, I. E.; Heise, C.; Wranik, M.; Velasco, C. D.; Taylor, J. A.; Terni, B.; Standfuss, J.; Cabernard, C. C.; Llobet, A.; Steinmetz, M. O.; Bausch, A. R.; Distel, M.; Thorn-Seshold, J.; Akhmanova, A.; Thorn-Seshold, O. In Vivo Photocontrol of Microtubule Dynamics and Integrity, Migration and Mitosis, by the Potent GFP-Imaging-Compatible Photoswitchable Reagents SBTubA4P and SBTub2M. *bioRxiv* **2021**. <https://doi.org/10.1101/2021.03.26.437160>.
- (10) Nicolaou, K.; Scarpelli, R.; Bollbuck, B.; Werschkun, B.; Pereira, M.; Wartmann, M.; Altmann, K.-H.; Zaharevitz, D.; Gussio, R.; Giannakakou, P. Chemical Synthesis and Biological Properties of Pyridine Epothilones. *Chem. Biol.* **2000**, *7* (8), 593–599. [https://doi.org/10.1016/S1074-5521\(00\)00006-5](https://doi.org/10.1016/S1074-5521(00)00006-5).
- (11) Awad, M. K.; El-Hendawy, M. M.; Fayed, T. A.; Etaiw, S. E. H.; English, N. J. Aromatic Ring Size Effects on the Photophysics and Photochemistry of Styrylbenzothiazole. *Photochem Photobiol Sci* **2013**, *12* (7), 1220–1231. <https://doi.org/10.1039/c3pp25367h>.
- (12) Klán, P.; Šolomek, T.; Bochet, C. G.; Blanc, A.; Givens, R.; Rubina, M.; Popik, V.; Kostikov, A.; Wirz, J. Photoremovable Protecting Groups in Chemistry and Biology: Reaction Mechanisms and Efficacy. *Chem. Rev.* **2013**, *113* (1), 119–191. <https://doi.org/10.1021/cr300177k>.
- (13) Thorn-Seshold, O.; Meiring, J. Photocontrolling Microtubule Dynamics with Photoswitchable Chemical Reagents. *ChemRxiv* **2021**. <https://doi.org/10.26434/chemrxiv.14424176.v1>.
- (14) Gao, L.; Meiring, J. C. M.; Varady, A.; Ruider, I. E.; Heise, C.; Wranik, M.; Velasco, C. D.; Taylor, J. A.; Terni, B.; Standfuss, J.; Cabernard, C. C.; Llobet, A.; Steinmetz, M. O.; Bausch, A. R.; Distel, M.; Thorn-Seshold, J.; Akhmanova, A.; Thorn-Seshold, O. In Vivo Photocontrol of Microtubule Dynamics and Integrity, Migration and Mitosis, by the Potent GFP-Imaging-Compatible Photoswitchable Reagents SBTubA4P and SBTub2M. *bioRxiv* **2021**, 2021.03.26.437160. <https://doi.org/10.1101/2021.03.26.437160>.
- (15) Schindelin, J.; Arganda-Carreras, I.; Frise, E.; Kaynig, V.; Longair, M.; Pietzsch, T.; Preibisch, S.; Rueden, C.; Saalfeld, S.; Schmid, B.; Tinevez, J.-Y.; White, D. J.; Hartenstein, V.; Eliceiri, K.; Tomancak, P.; Cardona, A. Fiji: An Open-Source Platform for Biological-Image Analysis. *Nat. Methods* **2012**, *9* (7), 676–682. <https://doi.org/10.1038/nmeth.2019>.
- (16) Bieling, P.; Laan, L.; Schek, H.; Munteanu, E. L.; Sandblad, L.; Dogterom, M.; Brunner, D.; Surrey, T. Reconstitution of a Microtubule Plus-End Tracking System in Vitro. *Nature* **2007**, *450* (7172), 1100–1105. <https://doi.org/10.1038/nature06386>.
- (17) Rai, A.; Liu, T.; Glauser, S.; Katrukha, E. A.; Estévez-Gallego, J.; Rodríguez-García, R.; Fang, W.-S.; Díaz, J. F.; Steinmetz, M. O.; Altmann, K.-H.; Kapitein, L. C.; Moores, C. A.; Akhmanova, A. Taxanes Convert Regions of Perturbed Microtubule Growth into Rescue Sites. *Nat. Mater.* **2020**, *19* (3), 355–365. <https://doi.org/10.1038/s41563-019-0546-6>.
